# Supplementary material
Source: PubMed Central journal article supplement (PMC10060707)

## SUPPLEMENTARY DATA

### Implementation of a practical Markov chain Monte Carlo sampling algorithm in PyBioNetFit

Jacob Neumann<sup>1</sup>, Yen Ting Lin<sup>2</sup>, Abhishek Mallela<sup>4</sup>, Ely F. Miller<sup>1</sup>, Joshua Colvin<sup>1</sup>, Abell T. Duprat<sup>1</sup>, Ye Chen<sup>1</sup>, William S. Hlavacek<sup>3\*</sup> and Richard G. Posner<sup>1\*</sup>

<sup>1</sup>Department of Biological Sciences, Northern Arizona University, Flagstaff, Arizona 86011, USA

<sup>2</sup>Computer, Computational, and Statistical Sciences Division and <sup>3</sup>Theoretical Division, Los Alamos National Laboratory, Los Alamos, New Mexico 87545, USA

<sup>4</sup>Department of Mathematics University of California, Davis, California 95616, USA

\*Corresponding authors: W.S.H. ([wish@lanl.gov](mailto:wish@lanl.gov)), R.G.P. ([richard.posner@nau.edu](mailto:richard.posner@nau.edu))

**PyBioNetFit documentation:** <https://pybnf.readthedocs.io/en/latest/>

**PyBioNetFit source code:** <https://github.com/lanl/pybnf>

### Supplementary Information:

1. Cover sheet and table of contents – p. 1
2. References cited in Supplementary Information – p. 2
3. Supplementary Methods – included in this PDF file (pp. 3–7)
4. Supplementary Table S1 – included in this PDF file (p. 8) [Effective sample sizes for *am* and *mh* for Test Problem 3]
5. Supplementary Fig. S1 – included in this PDF file (pp. 9–13) [Results from Test Problem 1]
6. Supplementary Fig. S2–S4 – included in this PDF file (pp. 14–28) [Results from Test Problems 2A–2C]
7. Supplementary Fig. S5 – included in this PDF file (pp. 29–33) [Results from Test Problem 3]
8. Supplementary Figs. S6–S20 – included in this PDF file (pp. 34–108) [Results from Test Problems 4A–4O]
9. Supplementary File S1 (in ZIP file) [CONF, BNGL, and EXP files for Test Problem 1] – these files are also available at [https://github.com/lanl/PyBNF/tree/master/examples/LinearRegression\\_aMCMC](https://github.com/lanl/PyBNF/tree/master/examples/LinearRegression_aMCMC)
10. Supplementary File S2 (in ZIP file) [CONF, BNGL, and EXP files for Test Problems 2A–2C] – these files are also available at [https://github.com/lanl/PyBNF/tree/master/examples/HIVdynamics\\_aMCMC](https://github.com/lanl/PyBNF/tree/master/examples/HIVdynamics_aMCMC)
  - 10.1. The subdirectory pt303 contains files for Patient 303 viral decay dynamics
  - 10.2. The subdirectory pt403 contains files for Patient 403 viral decay dynamics
  - 10.3. The subdirectory pt409 contains files for Patient 409 viral decay dynamics
11. Supplementary File S3 (in ZIP file) [CONF, BNGL, and EXP files for Test Problem 3] – these files are also available at [https://github.com/lanl/PyBNF/tree/master/examples/Degranulation\\_aMCMC](https://github.com/lanl/PyBNF/tree/master/examples/Degranulation_aMCMC)
12. Supplementary File S4 (in ZIP file) [CONF, BNGL, and EXP files for Test Problems 4A–4O] – these files are also available at [https://github.com/lanl/PyBNF/tree/master/examples/COVID19forecasting\\_aMCMC](https://github.com/lanl/PyBNF/tree/master/examples/COVID19forecasting_aMCMC)
  - 12.1. The subdirectory BigApple contains files for the New York City MSA epidemic
  - 12.2. The subdirectory LaLaLand contains files for the Los Angeles MSA epidemic
  - 12.3. The subdirectory WindyCity contains files for the Chicago MSA epidemic
  - 12.4. The subdirectory BigD contains files for the Dallas MSA epidemic
  - 12.5. The subdirectory HTown contains files for the Houston MSA epidemic
  - 12.6. The subdirectory DC contains files for the Washington DC MSA epidemic
  - 12.7. The subdirectory MagicCity contains files for the Miami MSA epidemic
  - 12.8. The subdirectory BrotherlyLove contains files for the Philadelphia MSA epidemic
  - 12.9. The subdirectory Hotlanta contains files for the Atlanta MSA epidemic
  - 12.10. The subdirectory Valley\_of\_the\_Sun contains files for the Phoenix MSA epidemic
  - 12.11. The subdirectory Beantown contains files for the Boston MSA epidemic
  - 12.12. The subdirectory Frisco contains files for the San Francisco MSA epidemic
  - 12.13. The subdirectory InlandEmpire contains files for the Riverside MSA epidemic
  - 12.14. The subdirectory MotorCity contains files for the Detroit MSA epidemic
  - 12.15. The subdirectory EmeraldCity contains files for the Seattle MSA epidemic

**References cited in Supplementary Information:**

- Andrieu, C. *et al.* (2003) An introduction to MCMC for machine learning. *Mach. Learn.*, **50**, 5–43.
- Andrieu, C. and Thoms, J. (2008) A tutorial on adaptive MCMC. *Stat. Comput.*, **18**, 343–373.
- Faeder, J.R., Blinov, M.L., and Hlavacek, W.S. (2009) Rule-based modeling of biochemical systems with BioNetGen. *Methods Mol. Biol.*, **500**, 113–167.
- Gelman, A., Gilks, W.R., Roberts, G.O. (1997) Weak convergence and optimal scaling of random walk Metropolis algorithms. *Ann. Appl. Probab.*, **7**, 110–120.
- Gelman, A. *et al.* (2014) *Bayesian Data Analysis*, Third Edition. CRC Press, Boca Raton, FL
- Harmon, B. *et al.* (2017) Timescale separation of positive and negative signaling creates history-dependent responses to IgE receptor stimulation. *Sci. Rep.*, **7**, 15586.
- Ho, D.D. *et al.* (1995) Rapid turnover of plasma virions and CD4 lymphocytes in HIV-1 infection. *Nature*, **373**, 123–126.
- Keating, S.M. *et al.* (2020) SBML Level 3: an extensible format for the exchange and reuse of biological models. *Mol. Syst. Biol.*, **16**, e9110.
- Lin, Y.T. *et al.* (2021) Daily forecasting of regional epidemics of Coronavirus Disease with Bayesian uncertainty quantification, United States. *Emerg. Inf. Dis.*, **27**, 767–778.
- Mitra, E.D. *et al.* (2019) PyBioNetFit and the Biological Property Specification Language. *iScience*, **19**, 1012–1036.
- Perelson, A.S. *et al.* (1996) HIV-1 dynamics in vivo: virion clearance rate, infected cell life-span, and viral generation time. *Science*, **271**, 1582–1586.
- Somogyi E.T. *et al.* (2015) LibRoadRunner: a high performance SBML simulation and analysis library. *Bioinformatics*. **31**:3315–3321.

## Supplementary Methods

This report is about version 1.1.9 of the PyBioNetFit (PyBNF) software package (Mitra et al., 2019) (<https://github.com/lanl/PyBNF/>). Features introduced in version 1.1.9 are summarized in the release history: <https://github.com/lanl/PyBNF/releases>

Version 1.1.9 can be installed using the following command:

```
pip install pybnf==1.1.9
```

Additional information about installation is available in the online documentation:

<https://pybnf.readthedocs.io/en/latest/>

The documentation has been updated to cover usage of new features. Tutorial videos are available:

[https://www.youtube.com/channel/UCJfIDUiRIUR6-MZAt1k\\_Pg](https://www.youtube.com/channel/UCJfIDUiRIUR6-MZAt1k_Pg)

The most significant change in 1.1.9 is addition of the `am` method, an adaptive Markov chain Monte Carlo (aMCMC) sampler. Below, this sampler is explained, as are the test problems that we used to evaluate the sampler. We also discuss calculation of effective sample sizes, trace plots, and pairs plots, which are important diagnostic tools for assessing sampling efficiency, and posterior predictive checking, which is important for assessing model fit to data.

### Methodological background and overview of PyBNF's `am` method

**MCMC sampling with PyBNF.** We will be concerned with MCMC sampling (Andrieu et al., 2003) as used to solve Bayesian inference problems wherein inference is conditioned on a specified model with  $N$  parameters  $\theta \in \mathbb{R}^N$  taken to have uncertain values. PyBNF, through its interfaces to BioNetGen (Faeder et al., 2009) and libRoadRunner (Somogyi et al., 2015), is compatible with models specified in BNGL and SBML formats (Faeder et al., 2009; Keating et al., 2020). Given a dataset  $D$  (providing information about  $\theta$ ), the goal of Bayesian inference is to find the posterior probability density function  $p(\theta|D)$ , which is often called the parameter posterior or simply the posterior. Problematically,  $p(\theta|D)$  is not analytically tractable except in special cases. MCMC methods generate samples of the parameter posterior by leveraging Bayes' formula. This formula states that  $p(\theta|D) = p(D|\theta) p(\theta)/Z$ , where  $p(D|\theta)$  is the probability density of  $D$  given  $\theta$ ,  $p(\theta)$  is the prior (which is specified so as to capture available information about  $\theta$  that is external to  $D$ ), and  $Z$  is a normalization constant. If no information about  $\theta$  is available except for  $D$ , it is common to specify a flat or uniform prior, which may be proper (i.e., constant over a specified range for each parameter and 0 elsewhere) or improper (taken to be constant everywhere). PyBNF supports specification of proper uniform priors, as well as normal priors. PyBNF supports various types of model-constrained likelihood functions, i.e., specific functional forms for the likelihood  $\mathcal{L}(\theta|D) = p(D|\theta)$ . Currently, the best supported are a normal likelihood function  $\mathcal{N}(\mu, \sigma^2)$ , wherein the hyperparameter  $\sigma$  may be fixed before inference or jointly inferred with model parameters, and a negative binomial likelihood function  $\text{NB}(p, r)$ , wherein the hyperparameter  $r$  may be fixed before inference or jointly inferred with model parameters. The normalization constant  $Z := p(D) = \int p(D|\theta) p(\theta) d\theta$  is often referred to as the Bayes evidence or marginalized likelihood. Calculation of  $Z$  is usually difficult (even computationally) as it entails high-dimensional integration over the entire parameter space. This difficulty is bypassed with MCMC sampling, which relies on calculating ratios of posterior densities (in the Metropolis–Hastings sampling criterion, which is discussed below). These ratios do not depend on  $Z$ . MCMC sampling can be viewed as a special kind of random movement of a walker or sampler within  $N$ -dimensional parameter space. This movement, a discrete-time Markov stochastic process, is designed such that the long-time stationary distribution of the process converges to the posterior  $p(D|\theta)$ . Thus, if the stochastic process is performed for a sufficiently long time, the distribution of the samples collected along the process trajectory through parameter space will provide a reasonable approximation of  $p(D|\theta)$ . MCMC sampling methods akin to the well-known Metropolis–Hastings sampler, like the aMCMC sampler implemented in PyBNF, involve many iterations of three key steps. The first step is generation of a random proposal parameter set  $\theta'$ . The proposal  $\theta'$  may depend on  $\theta_t$ , the location of the sampler in parameter space at time  $t$  (i.e., the initial parameter set at  $t = 0$  or the last accepted parameter set at time  $t > 0$ ). The proposal is usually generated from a proposal kernel, which we will denote as  $K(\theta'|\theta_t)$ . (The proposal kernel is discussed below.) The second step is to determine whether the proposal should be accepted. The proposal is accepted with probability given by

$$\min \left\{ 1, \frac{p(D|\theta') p(\theta')}{p(D|\theta_t) p(\theta_t)} \right\}$$

which is called the Metropolis–Hastings sampling criterion. Finally, if the proposal  $\theta'$  is accepted, the location of the sampler is updated using the mapping  $\theta_{t+1} \leftarrow \theta'$ . Otherwise,  $\theta_{t+1} \leftarrow \theta_t$ . When the proposal kernel  $K$  is designed such that the stochastic process is ergodic (that is, there is non-zero probability to visit any given point in parameter space from any starting point) and Metropolis–Hastings sampling criterion is used to accept/reject move proposals, the long-time statistics of the stochastic process converges to  $p(D|\theta) p(\theta)$ , which is proportional to  $p(\theta|D)$ .

**The proposal kernel  $K$  is critical for efficient MCMC sampling.** During MCMC sampling, the convergence rate to the target (posterior) distribution strongly depends on the choice of the proposal kernel  $K$ , despite the fact that an ergodic process with any proposal kernel is guaranteed to converge given a sufficiently long trajectory. PyBNF implements a commonly chosen proposal kernel:  $K(\theta'|\theta_t) \sim \mathcal{N}(\theta_t, \Sigma)$ , where  $\Sigma$  is the covariance matrix of the multivariate Gaussian distribution. It is known that the optimal choice of  $\Sigma$  is inference problem-specific and is related to the covariance matrix of the target density  $p(\theta|D)$ , i.e.,  $\Sigma_{\theta|D} := \int (\theta_i - \bar{\theta}_i)(\theta_j - \bar{\theta}_j) p(\theta|D) d\theta$ , where the mean of the  $i^{\text{th}}$  and  $j^{\text{th}}$  parameter are given by  $\bar{\theta}_i := \int \theta_i p(\theta|D) d\theta$  and  $\bar{\theta}_j :=$

$\int \theta_j p(\theta|D) d\theta$ , respectively. Ideally,  $\Sigma = f \cdot \Sigma_{\theta|D}$  where  $f = 2.38^2/N$  (Andrieu and Thoms, 2008). However,  $\Sigma_{\theta|D}$  is generally not known *a priori*, and the prefactor  $f$  potentially depends on higher-moment statistics of the target distribution  $p(\theta|D)$ . This situation has motivated development of a family of adaptive methods for learning the optimal prefactor  $f$  and  $\Sigma_{ij}^*$  (an approximation of  $\Sigma_{\theta|D}$ ) *on-the-fly* from MCMC trajectories (Andrieu and Thomas, 2008).

**How PyBNF’s adaptive MCMC sampler works.** In our update of PyBNF to version 1.1.9, we implemented the adaptive MCMC algorithm labeled as Algorithm 4 in Andrieu and Thoms (2008). We found this method to be useful for solving challenging Bayesian inference problems in an epidemiological forecasting study (Lin et al., 2021). For pseudo code, we refer the reader to Andrieu and Thoms (2008). Here, we explain how the adaptive algorithm learns the prefactor  $f$  and  $\Sigma_{ij}^*$  (the approximation of  $\Sigma_{\theta|D}$ ) *on-the-fly* as understanding this procedure is important for proper use of PyBNF’s *am* method. Use of this method to solve an inference problem consists of four sampling phases, which are defined by three user-supplied settings for the algorithmic parameters  $n_{\text{burn-in}}$ ,  $n_{\text{adaptive}}$ , and  $n_{\text{stationary}}$ . The four phases are described as follows. **(1) Burn-in phase.** The MCMC chain is initiated at a point in parameter space corresponding to user-specified initial guesses for the uncertain parameters,  $\theta_0$ , and move proposals are made on the basis of a multivariate Gaussian kernel having a user-specified covariance matrix,  $\Sigma_0$ . Sampling during the burn-in phase proceeds until iteration  $n_{\text{burn-in}}$ . The goal of burn-in is to allow the chain to relax to a high-density region of the posterior distribution  $p(\theta|D)$ . If  $\theta_0$  is known *a priori* to be located within a high-density region, the burn-in phase can be bypassed (by setting  $n_{\text{burn-in}} = 0$ ). **(2) Mixing phase.** MCMC sampling on the basis of  $\Sigma_0$  continues until the current iteration reaches  $n_{\text{burn-in}} + n_{\text{adaptive}}$ . The  $n_{\text{adaptive}}$  samples collected during the mixing phase are used to compute an empirical covariance matrix  $\hat{\Sigma}$ , which is an  $N \times N$  positive definite matrix. The user should check to make sure that the move acceptance rate during mixing was large enough to produce enough samples to enable learning the covariance matrix. **(3) Adaptation phase.** At iteration  $n_{\text{burn-in}} + n_{\text{adaptive}}$ , the empirical covariance matrix  $\hat{\Sigma}$  (defined on the basis of samples generated during the mixing phase) is used to initialize  $\Sigma_{ij}^*$ . The prefactor  $f$  is also initialized, on the basis of a user-supplied setting. During the adaptation phase,  $f$  and  $\Sigma_{ij}^*$  are updated *on-the-fly* as new samples are generated. The algorithm imposes a decaying weight on samples such that the learned settings for  $f$  and  $\Sigma_{ij}^*$  eventually stabilize. The weight is proportional to  $1/n$ , where  $n$  is the number of iterations after the start of adaptation. (After  $1/n$  becomes small, which stabilizes settings for  $f$  and  $\Sigma_{ij}^*$ , the *am* algorithm behaves like a standard MCMC algorithm.) The purpose of the adaptation phase is to make  $\Sigma_{ij}^*$  as close to  $\Sigma_{\theta|D}$  as possible and to find a setting for  $f$  that yields an acceptance rate close to the optimal acceptance rate of 0.234 (Gelman et al., 1997). *NB:* the adaptation phase may fail to achieve these goals. Importantly, if  $\Sigma_{ij}^*$  is deemed *not* to be close to  $\Sigma_{\theta|D}$  after adaptation (which will manifest as inefficient sampling, which can be detected as discussed below), one should restart sampling at the mixing phase, ideally using a better choice for  $\Sigma_0$ . *NB:* trying to remedy inefficient sampling because of failure of the adaptation phase by generating a large number of samples in the stationary phase (which is discussed below) will be unnecessarily wasteful of computational resources and is likely to be unhelpful. **(4) Stationary phase.** At iteration  $n_{\text{stationary}}$ , samples will begin to be collected for the purpose of defining the posterior distribution  $p(\theta|D)$ . We recommend selecting  $n_{\text{stationary}}$  such that  $\Delta n := n_{\text{stationary}} - (n_{\text{burn-in}} + n_{\text{adaptive}})$  is at least  $10^3$ . In test applications, we set  $n_{\text{stationary}}$  such that  $\Delta n > 10^4$ . Sampling during the stationary phase should initially be conservative so as to allow efficiency of sampling to be assessed before committing to the generation of a large number of samples (needed for fine resolution of the parameter posterior). PyBNF supports sampling restarts; we refer the reader to the online documentation for details.

**Assessing the efficiency of MCMC sampling.** The quality and efficiency of sampling should always be assessed. There are numerous ways to accomplish this task. Here, for selected chains which were deemed to be long and mixed enough to approximate the posterior distribution, we calculated the effective sample size (ESS), which provides a metric for estimating the number of independent samples generated for a specified estimand (Gelman et al., 2014). We used the TensorFlow Probability Python library (<https://www.tensorflow.org/probability>) to calculate ESS for parameters follows:

```
import tensorflow_probability as tfp
ESS = tfp.mcmc.effective_sample_size(parLog).numpy()
```

where *parLog* is the 2-dimensional array of an MCMC chain wherein each column corresponds to a particular parameter and each row is a sample along the MCMC chain. An output file of PyBNF, for example, `fileForDegran_mh.txt`, can be loaded via the `genfromtxt` function in the NumPy library, i.e., `parLog = np.genfromtxt('fileForDegran_mh.txt')`. An ESS is computed for each parameter (i.e., each column in the array), so the returned ESS is a 1-dimensional array with  $N$  entries, where  $N$  is the number of free/adjustable parameters. Results of ESS calculations are shown in Supplementary Table S1. A small ESS value relative to the total number of samples in the full chain corresponds to a highly temporally correlated chain, which is indicative of inefficient sampling. Larger values allow for better coverage of the parameter posterior. We inspected log-likelihood and parametric trace plots (parameter value vs. iteration/position in the chain), which are shown in panel C of Supplementary Figs. S1–S20. A trace plot should indicate stationarity and good mixing (i.e., exploration of the posterior in the region of high density). We inspected pairs plots, which are shown in panels D and E of Supplementary Figs. S1–S20. A pairs plot is a matrix of 1- and 2-dimensional marginalizations of a multivariate parameter posterior. The 1-dimensional marginalizations (or marginal posteriors) appear on a diagonal (top left to bottom right). The other elements of the matrix are the 2-dimensional marginalizations. These plots, which provide visual insights into the shape of the parameter posterior, may be generated as histograms or as contour plots, which are found through kernel density estimation (KDE). The 2-dimensional marginalizations



shown in Supplementary Figs. S1–S20 are contour plots. These plots were made using `seaborn.kdeplot` in the Python `seaborn` module (<https://seaborn.pydata.org/generated/seaborn.kdeplot.html>) with default settings, that is, a Gaussian kernel with the bandwidth set by Scott’s rule. We used KDE to generate contour plots (vs. showing two-dimensional histograms) because our pairs plots are based on large-size collections of samples. KDE was used as a data dimension reduction technique to pare figure file sizes down to manageable sizes.

**Posterior predictive checking.** Visualizations of posterior predictive distributions (Gelman et al., 2014) are shown in panel A of Supplementary Figs. S1–S20. These visualizations are useful for assessing a model’s explanatory power. Here, a posterior predictive is a distribution of model outputs generated by re-sampling from the parameter posterior and using the sampled parameter values to perform simulations that generate predictions (or other model-based calculations of outputs). Thus, the posterior predictive captures uncertainty in predictions arising from uncertainty in parameter values. The posterior predictive may be defined so as to also capture measurement noise. Injecting measurement noise into the posterior predictive allows for assessment of model consistency with data. A 95% credible interval, for example, for such a posterior predictive should cover 95% of the data used in inference.

### Test problems used to evaluate PyBNF’s `am` method

**Test Problem 1.** We contrived a linear regression problem to illustrate the power of PyBNF’s adaptive MCMC sampler (`am`) over PyBNF’s conventional MH-MCMC sampler (`mh`). Consider an affine transformation  $f: \mathbb{R}^{10 \times 1} \rightarrow \mathbb{R}^1$  mapping a 10-dimensional input vector  $x$  to a 1-dimensional real number  $y$ :

$$y = f(x) + \varepsilon = w^T \cdot x + b + \varepsilon,$$

with weight vector  $w \in \mathbb{R}^{10 \times 1}$  and bias  $b \in \mathbb{R}^1$ . For each input  $x$ , we injected normally and independently distributed noise  $\varepsilon \sim \mathcal{N}(0, \sigma^2)$ . Our goal is to quantify the posterior distribution of  $(w, b)$  given a set of  $N$  input-output pairs  $\{x^{[i]}, y^{[i]}\}_{i=1}^N$ . We assume that noise statistics,  $\varepsilon \sim \mathcal{N}(0, \sigma^2)$ , have been characterized, i.e., we know  $\sigma$ . In this problem, we set  $N = 256$  and  $\sigma = 1/2$ . To facilitate derivation of an analytical expression for the posterior, we take the prior for  $(w, b)$  to be everywhere uniform. This prior is improper. In the PyBNF job setup, we specified a proper uniform prior for  $(w, b)$  that is functionally equivalent to an everywhere-uniform improper prior. (PyBNF only supports proper uniform priors.) An everywhere-uniform improper prior means that  $P(\theta) = \text{constant}$  for every  $\theta$  in the parameter space. The value of the constant is unimportant for MCMC sampling, as it does not enter the ratio in the Metropolis–Hastings criterion. Because PyBNF only supports proper uniform priors, practically, we can achieve an improper uniform prior by setting bounds on parameters that are far away from the high-density region of parameter space. With this approach, the sampler is unlikely to reach the bounds in a chain of finite length. In this particular problem, bounds were imposed at  $x_i = \pm 10$  (cf. the `CONF` file in Supplementary File S1). These bounds are far from the high-density region of parameter space (cf. Panel B in Supplementary Fig. S1).

We assume that the input distribution,  $p(x)$ , is a zero-mean multivariate Gaussian with a diagonal covariance matrix  $C$ . We assign values to the diagonal entries of the covariance matrix that are spread over several multiple scales:  $C_{ii} := 2^{-i+1}$ ,  $i = 1 \dots 10$ . As will be seen below, such a construction leads to a Gaussian posterior distribution with a wide range of variances in the high-dimensional parameter space. We assume a set of ground-truth parameters  $w = [1, 1, \dots, 1]^T$  and  $b = 0$  to generate the synthetic dataset. We first generate  $N$  multivariate Gaussian  $x^{[i]}$ ’s and univariate Gaussian  $\varepsilon^{[i]}$ ’s, then carry out the affine transformation with the ground-truth parameters to obtain the synthetic  $y^{[i]}$ ’s. The dataset is provided in Supplementary File S1. In the ZIP archive, the inputs can be found in the `BNGL` file and the outputs can be found in the `EXP` file.

Because the noise statistics are known—recall that  $\varepsilon \sim \mathcal{N}(0, \sigma^2)$ —the log-likelihood of an input-output pair has the follow functional form:

$$\log \mathcal{L}(w, b | \{x^{[i]}, y^{[i]}\}) = \frac{1}{2\sigma^2} [y^{[i]} - (w^T \cdot x^{[i]} + b)]^2 + \log \sigma.$$

Note that the choice of  $\sigma = 1/2$  leads to the sum-of-squares likelihood implemented in `PyBioNetFit`. Because each pair in the data set is independently distributed, the full log-likelihood of the dataset is the sum of the log-likelihood of each input-output pair:

$$\log \mathcal{L}(w, b | \{x^{[i]}, y^{[i]}\}_{i=1}^N) = \frac{1}{2\sigma^2} \sum_{i=1}^N [y^{[i]} - (w^T \cdot x^{[i]} + b)]^2 + N \cdot \log \sigma$$

From the prior being everywhere uniform, it follows that the posterior is also multivariate Gaussian:

$$p(w, b | \{x^{[i]}, y^{[i]}\}_{i=1}^N) \sim \exp \sum_{i=1}^N [y^{[i]} - (w^T \cdot x^{[i]} + b)]^2 \sim \mathcal{N}\left(0, \sigma^2 = \frac{1}{2}\right).$$

Given the dataset  $\{x^{[i]}, y^{[i]}\}_{i=1}^N$ , an analytical equation for the posterior distribution exists. Let us introduce  $\theta$  to represent the augmented model parameters  $(w, b)$  and introduce  $d^{[i]}$  to represent the augmented input vector (accounting for bias):

$$\theta := [w_1, w_2, \dots, w_{10}, b]^T \in \mathbb{R}^{11 \times 1}, \text{ and } d^{[i]} := [x_1^{[i]}, x_2^{[i]} \dots x_{10}^{[i]}, 1]^T \in \mathbb{R}^{11 \times 1},$$

The sample second moments can then be expressed as follows:

$$\Lambda := \frac{1}{N} \sum_{k=1}^N d^{[k]} \cdot (d^{[k]})^T \in \mathbb{R}^{11 \times 11} \text{ and } \phi := \frac{1}{N} \sum_{k=1}^N d^{[k]} \cdot y^{[k]} \in \mathbb{R}^{11 \times 1}.$$

It is straightforward to find the following expression for the posterior density:

$$p\left(\theta \mid \{x^{[i]}, y^{[i]}\}_{i=1}^N\right) \sim \mathcal{N}(\text{mean} = \Lambda^{-1} \cdot \phi, \text{covariance} = \Lambda^{-1} \sigma^2).$$

Note that the posterior density inherits the wide spectrum of the input covariance matrix  $C$ , because the first  $10 \times 10$  submatrix of  $\Lambda$  carries the sample statistics of the multivariate Gaussian random variable  $x$  with the covariance matrix  $C$ . Consistent with Bayesian reasoning, the maximum *a posteriori* estimate (MAP) of the model parameters  $\Lambda^{-1} \cdot \phi$  depends on the given dataset, and are not equal to the ground-truth parameters.

The PyBNF job setup files for Test Problem 1 are provided in Supplementary File S1. Results obtained with PyBNF's `am` method are compared those obtained with PyBNF's `mh` method and results from the analytical posterior (Supplementary Fig. S1).

**Test Problem 2.** In this test problem, we analyze patient data from Ho et al. (1995) using a two-phase exponential decay model for HIV dynamics under antiretroviral therapy (Perelson et al., 1996). We consider three sets of patient data, for Patients 303, 403, and 409 (Ho et al., 1995). The model can be expressed as follows:

$$\log V(t) = \begin{cases} \log V_0 & \text{for } 0 < t < \tau \\ \log[V_0(Ae^{-d_1(t-\tau)} + (1-A)e^{-d_2(t-\tau)})] & \text{for } t \geq \tau \end{cases}$$

The model has four uncertain patient-specific parameters:  $V_0$ , the baseline plasma viral load, which is assumed to be in a steady state from time  $t = 0$  (the time at which plasma viral load in each patient began to be monitored) to  $t = \tau$  (the start time of therapy); a dimensionless constant  $A$ , which lies between 0 and 1; and two strictly positive decay constants,  $d_1$  and  $d_2$ . The constants  $d_1$  and  $d_2$  are taken to characterize a fast phase of viral decay during therapy and a subsequent, slow phase of decay. As a simplification (to break the symmetry of  $d_1$  and  $d_2$ ), we constrain  $d_2$  to be less than  $d_1$ , i.e., we designate  $d_2$  to be the constant characterizing the slow phase of decay. The model has one known parameter:  $\tau = 7$  d, the start time of therapy. Inferences of the parameter posterior for  $\theta = (V_0, A, d_1, d_2)$  are conditioned on the model (as usual) and the fixed setting for  $\tau$ , which can be viewed as part of the model. We assume that errors in measurements of  $\log V(t)$  are normally distributed identically and independently across all measurement times. In this problem, we take the standard deviation of the noise kernel,  $\sigma$ , to be a hyperparameter, which we infer jointly together with the uncertain model parameters. The inference problem can be stated more precisely as follows. The dataset for a given patient consists of  $N$  measurements of viral load:  $V_i$  (at time  $t_i$ ) for  $i = 1, \dots, N$ . From the assumptions stated above, we find the following expression for the log-likelihood of the model parameters  $\theta$  and the hyperparameter  $\sigma \{V_0, A, d_1, d_2, \sigma\}$  given the data  $\{t_i, V_i\}_{i=1}^N$ :

$$\log \mathcal{L}((V_0, A, d_1, d_2, \sigma) \mid \{t_i, V_i\}_{i=1}^N) = \frac{1}{2\sigma^2} \sum_{i=1}^N [\log V_i - \log V(t = t_i)]^2 + N \cdot \log \sigma$$

We chose priors for model parameters as follows:

$$\begin{aligned} V_0 &\sim \text{Unif}(0, 2000) \\ A &\sim \text{Unif}(0, 1) \\ (d_1, d_2) &\sim \text{Unif}([0, 1]^2) \text{ s.t. } d_1 \geq d_2 \\ \sigma &\sim \text{Unif}(0, 10) \end{aligned}$$

The units of  $V_0$  are viral RNA copies per  $\mu\text{L}$  of plasma as in Fig. 1 of Ho et al. (1995). The units of  $d_1$  and  $d_2$  are  $\text{d}^{-1}$  (because time  $t$  has units of d). Recall that  $A$  is dimensionless.

The PyBNF job setup files for Test Problem 2 are provided in Supplementary File S2. This ZIP archive file includes a subdirectory with setup files for each of the three patients. Results obtained with PyBNF's `am` method are compared to those obtained with a problem-specific code in Supplementary Figs. S2–S4. These figures show results from inferences based on the datasets available for Patient 303 (Test Problem 2A), Patient 403 (Test Problem 2B), and Patient 409 (Test Problem 2C).

**Test Problem 3.** In this test problem, we analyze measured degranulation responses of mast cells to stimulation of IgE receptor signaling using a model for IgE receptor signaling (Harmon et al., 2017). This problem was previously used to evaluate PyBNF's `mh` method (Mitra et al., 2019). We refer the reader to Harmon et al. (2017) and Mitra et al. (2019) for additional details.

The PyBNF job setup files for Test Problem 3 are provided in Supplementary File S3. Results obtained with PyBNF's `am` method are compared to those obtained with PyBNF's `mh` method in Supplementary Fig. S5.

**Test Problem 4.** In this test problem, we analyze regional COVID-19 surveillance data (daily reports of new cases) using a compartmental model (Lin et al., 2021). We consider 15 regions, the metropolitan statistical areas (MSAs) encompassing the following cities (listed in order of population size, from largest to smallest): A) New York City, New York; B), Los Angeles, California; C) Chicago, Illinois; D) Dallas, Texas; E) Houston, Texas; F) Washington, DC; G) Miami, Florida; H) Philadelphia, Pennsylvania; I) Atlanta, Georgia; J) Phoenix, Arizona; K) Boston, Massachusetts; L) San Francisco, California; M) Riverside, California; N) Detroit, Michigan; and O) Seattle, Washington. We refer the reader to Lin et al. (2021) for a full description of the inference problems: the compartmental model used for all regions, the fixed and adjustable model parameters, the prior distributions for adjustable parameters, the probabilistic model of case detection, and the datasets. It should be noted that each inference is MSA-specific and that the number of uncertain/free/adjustable parameters in a model depends on the setting for  $n$ ,

the number of distinct social-distancing periods considered beyond the initial social-distancing period. Each social-distancing period is characterized by three parameters. The setting for  $n$  was determined through a model selection procedure (Lin et al., 2021). Inferences are conditioned on the model, the setting for  $n$ , and several fixed parameter estimates taken to be certain and applicable for all MSAs (Lin et al., 2021).

The PyBNF job setup files for Test Problem 4 are provided in Supplementary File S4. This ZIP archive file includes a subdirectory with setup files for each of the 15 MSAs. Results obtained with PyBNF's `am` method are compared to those obtained using the problem-specific code of Lin et al. (2021) in Supplementary Figs. S6–S20. These figures show results from inferences based on MSA-specific datasets for New York City (Test Problem 4A), Los Angeles (Test Problem 4B), Chicago (Test Problem 4C), Dallas (Test Problem 4D), Houston (Test Problem 4E), Washington DC (Test Problem 4F), Miami (Test Problem 4G), Philadelphia (Test Problem 4H), Atlanta (Test Problem 4I), Phoenix (Test Problem 4J), Boston (Test Problem 4K), San Francisco (Test Problem 4L), Riverside (Test Problem 4M), Detroit (Test Problem 4N), and Seattle (Test Problem 4O).

**Supplementary Table S1.** Effective sample sizes (ESSs)<sup>a</sup> of chains generated using PyBNF's *am* and *mh* methods.

| Parameter <sup>b</sup> | ESS <sub>am</sub> | ESS <sub>mh</sub> | Ratio (ESS <sub>am</sub> /ESS <sub>mh</sub> ) |
|------------------------|-------------------|-------------------|-----------------------------------------------|
| X_tot                  | 422               | 61.4              | 6.9                                           |
| k_Xoff                 | 780               | 72.6              | 10.7                                          |
| k_Xon                  | 655               | 41.1              | 15.9                                          |
| kase                   | 1050              | 52.0              | 20.1                                          |
| kdegX                  | 243               | 57.6              | 4.2                                           |
| kdegran                | 2010              | 72.6              | 27.7                                          |
| km_Ship1               | 388               | 74.4              | 5.2                                           |
| km_Syk                 | 817               | 76.0              | 10.8                                          |
| km_x                   | 738               | 43.2              | 17.1                                          |
| koff                   | 435               | 42.7              | 10.2                                          |
| kp_Ship1               | 473               | 136               | 3.5                                           |
| kp_Syk                 | 566               | 74.6              | 7.6                                           |
| kp_x                   | 214               | 70.6              | 3.0                                           |
| kpten                  | 584               | 58.7              | 10.0                                          |
| ksynth1                | 1080              | 68.7              | 15.7                                          |
| pase                   | 818               | 55.4              | 14.7                                          |

<sup>a</sup>Effective sample size was calculated for each adjustable model parameter as described in Supplementary Methods.

<sup>b</sup>Parameters are identified by their names in the BNGL file included in Supplementary File S3. The model is that of Harmon et al. (2017). The inference problem considered here was previously used to evaluate the *mh* method (Mitra et al., 2019).

## SUPPLEMENTARY FIGURE S1 – PANEL A

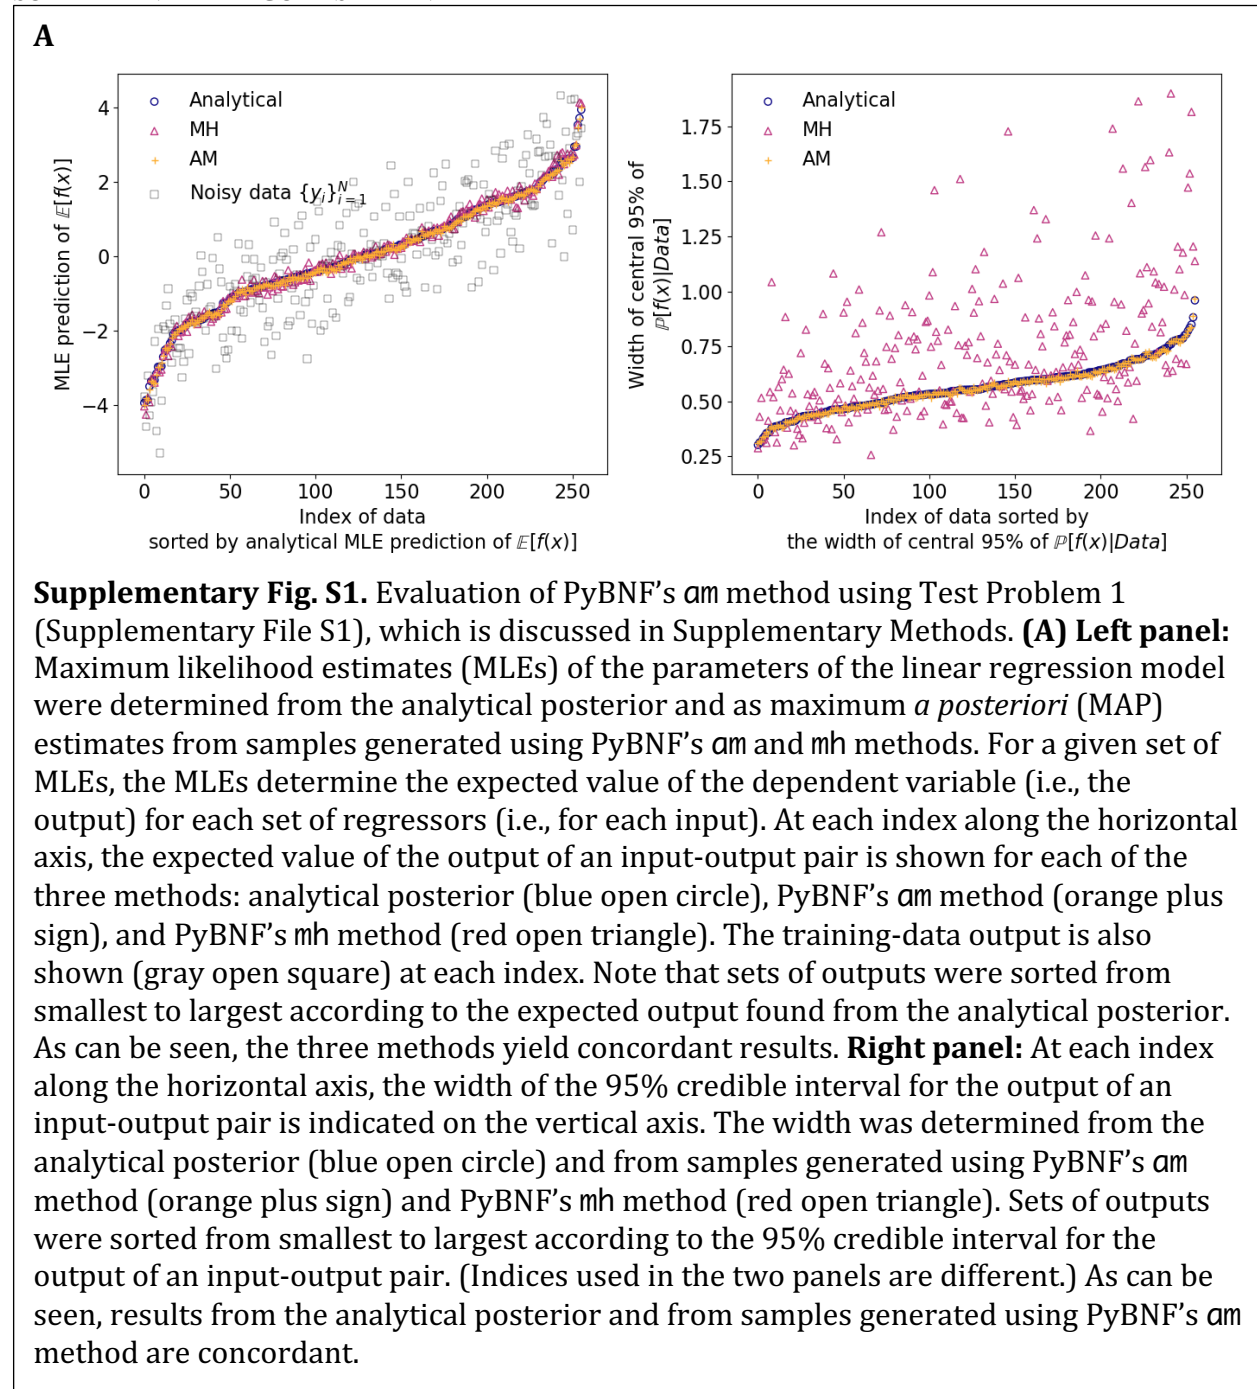

## SUPPLEMENTARY FIGURE S1 – PANEL B

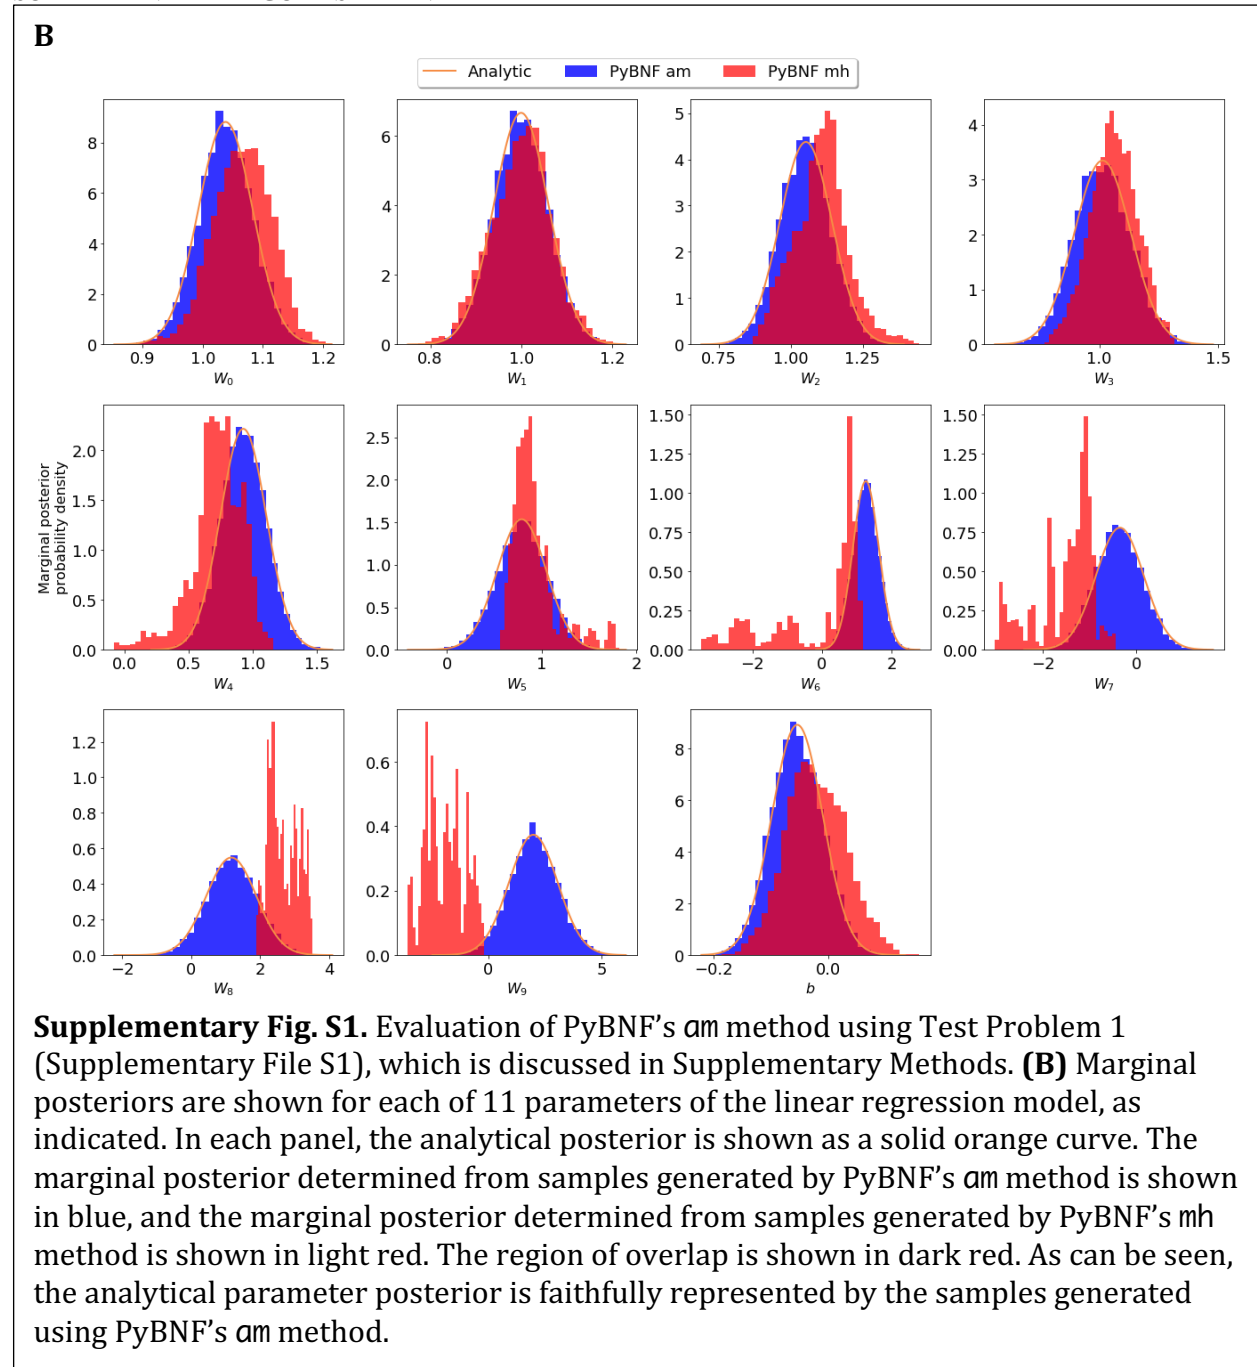



## SUPPLEMENTARY FIGURE S1 – PANEL C

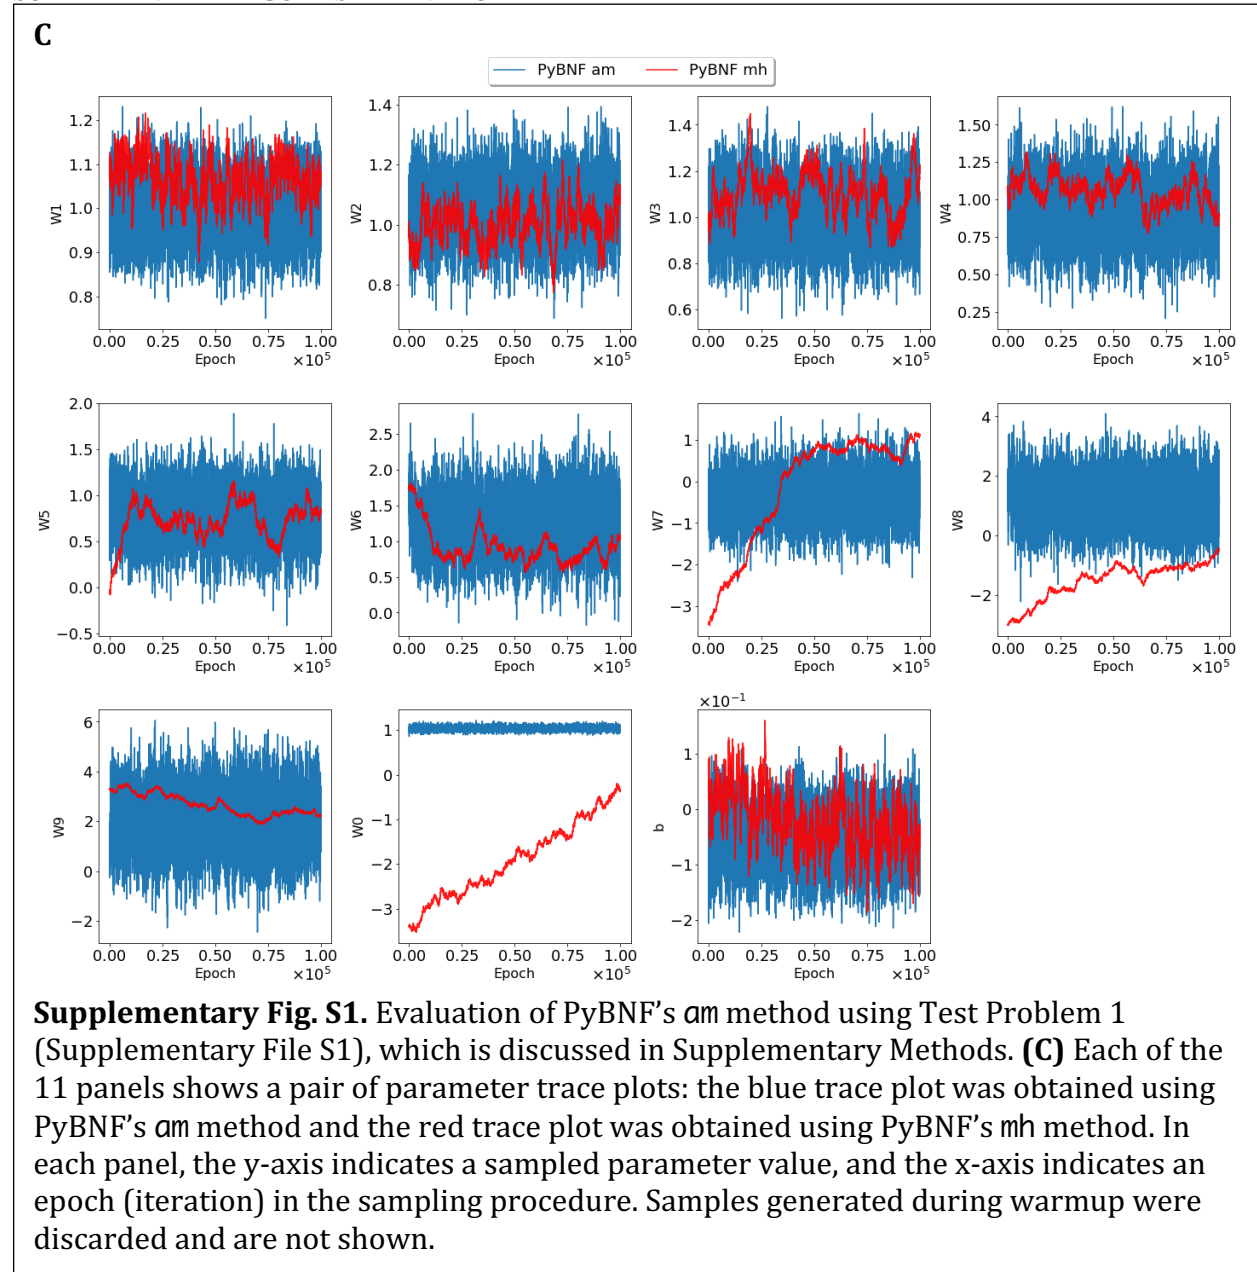

## SUPPLEMENTARY FIGURE S1 – PANEL D

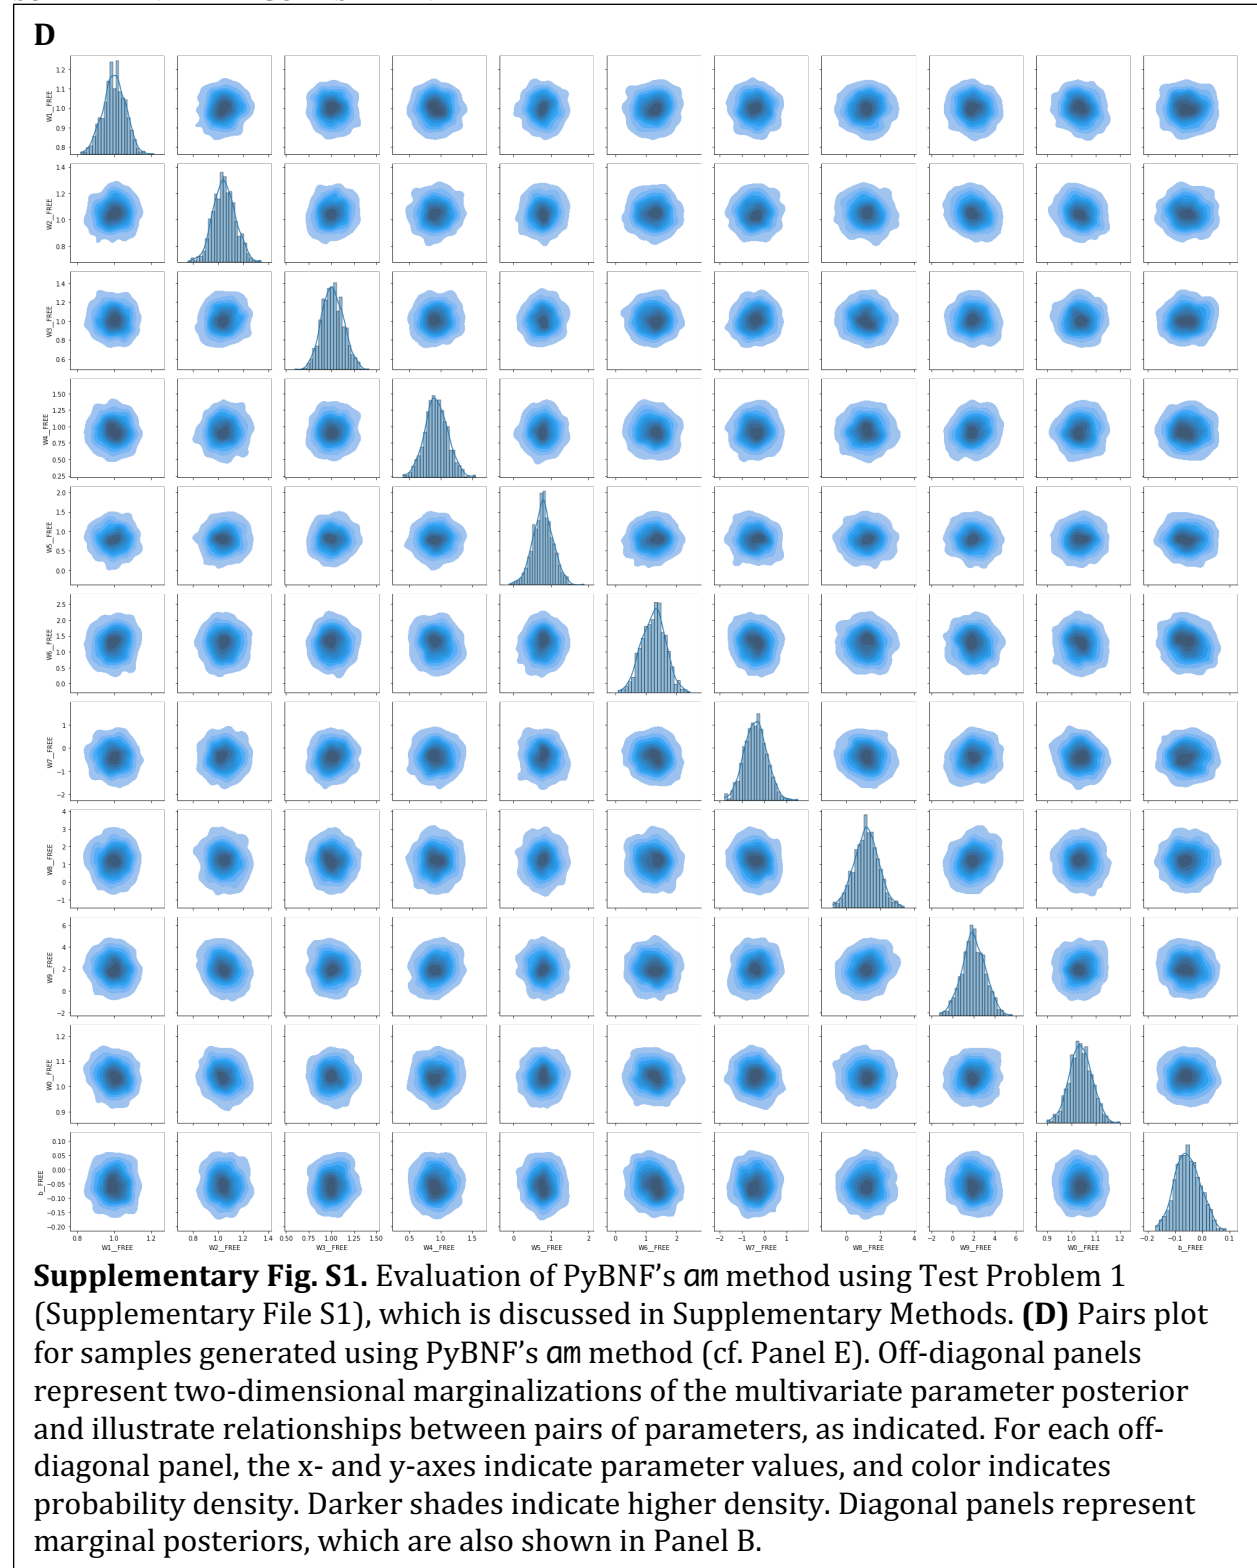

**SUPPLEMENTARY FIGURE S1 – PANEL E**

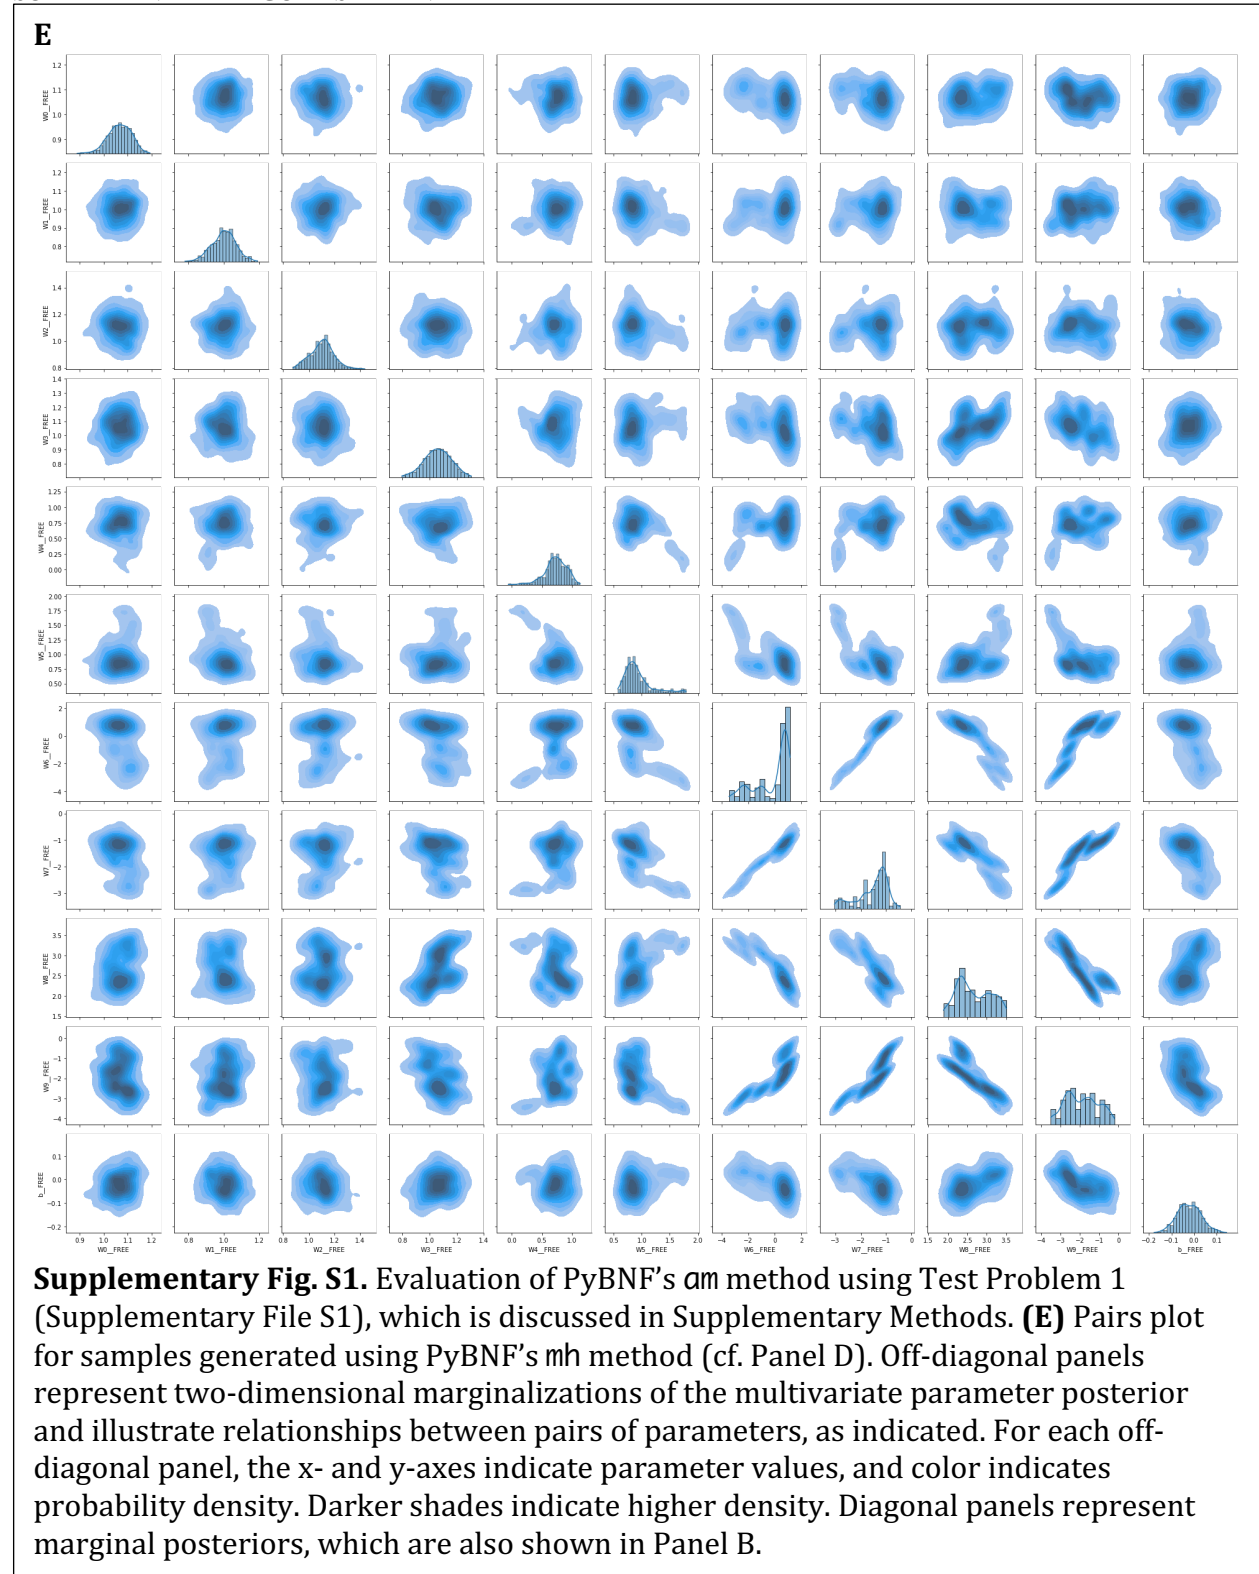

## SUPPLEMENTARY FIGURE S2 – PANEL A

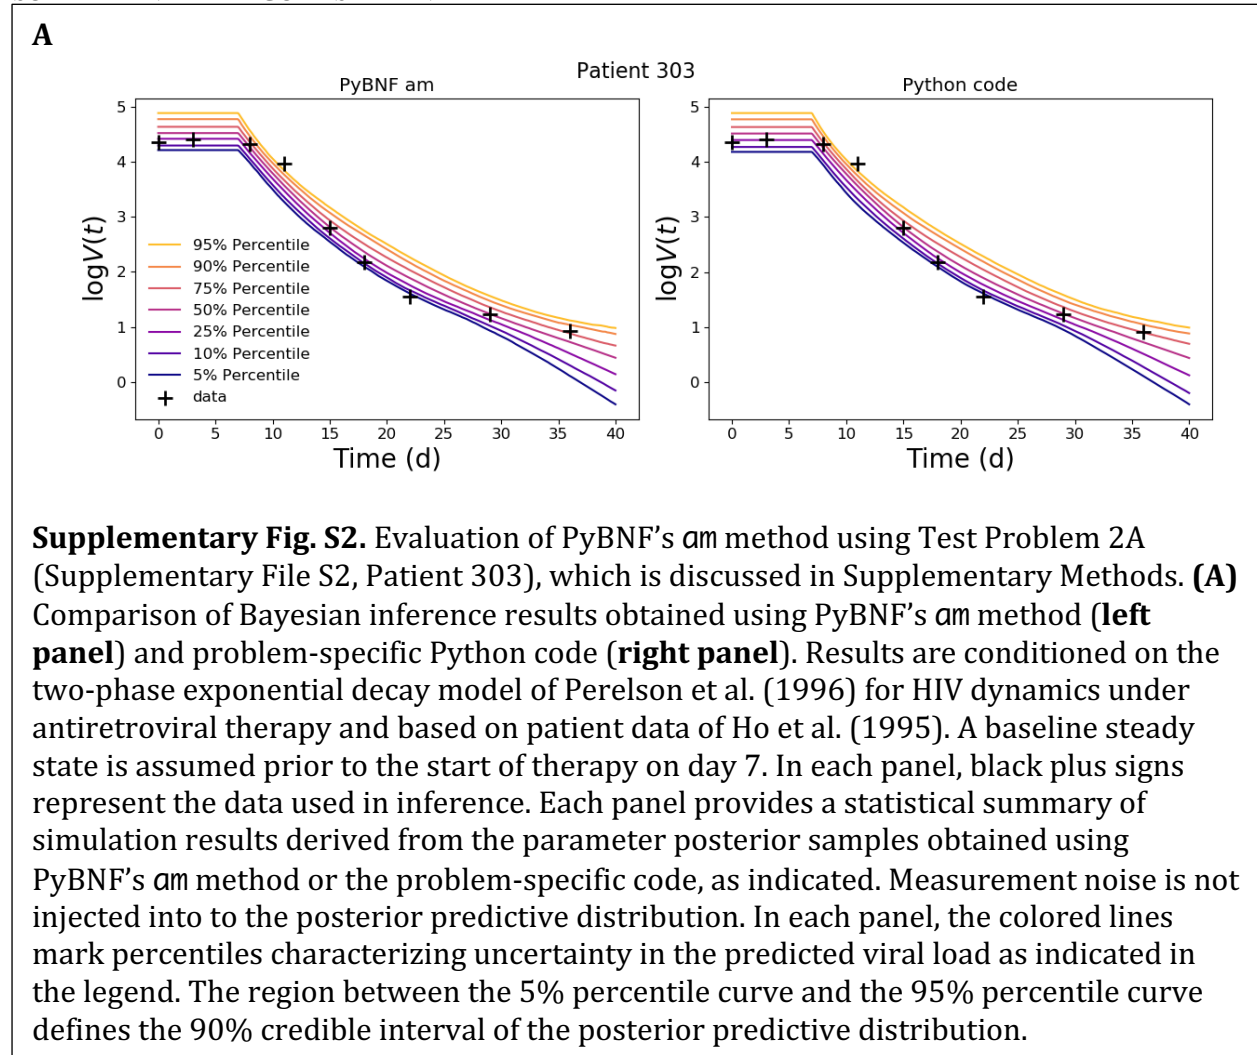

## SUPPLEMENTARY FIGURE S2 – PANEL B

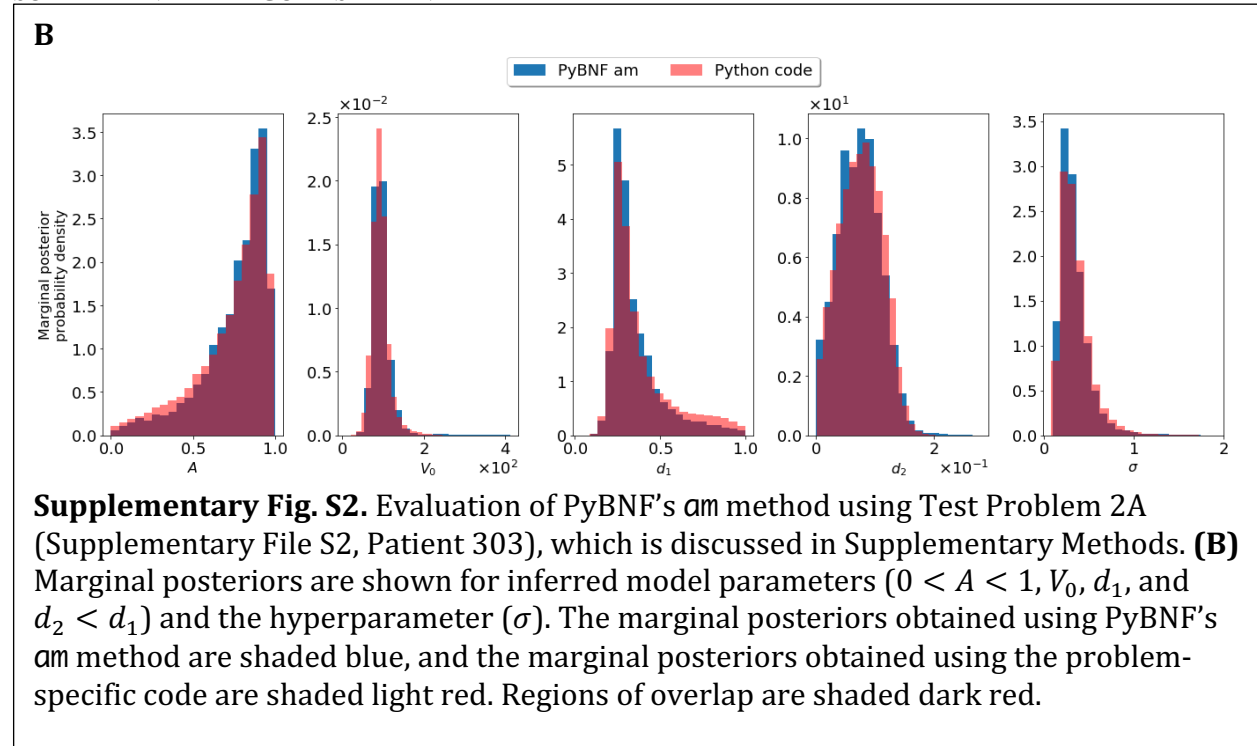

## SUPPLEMENTARY FIGURE S2 – PANEL C

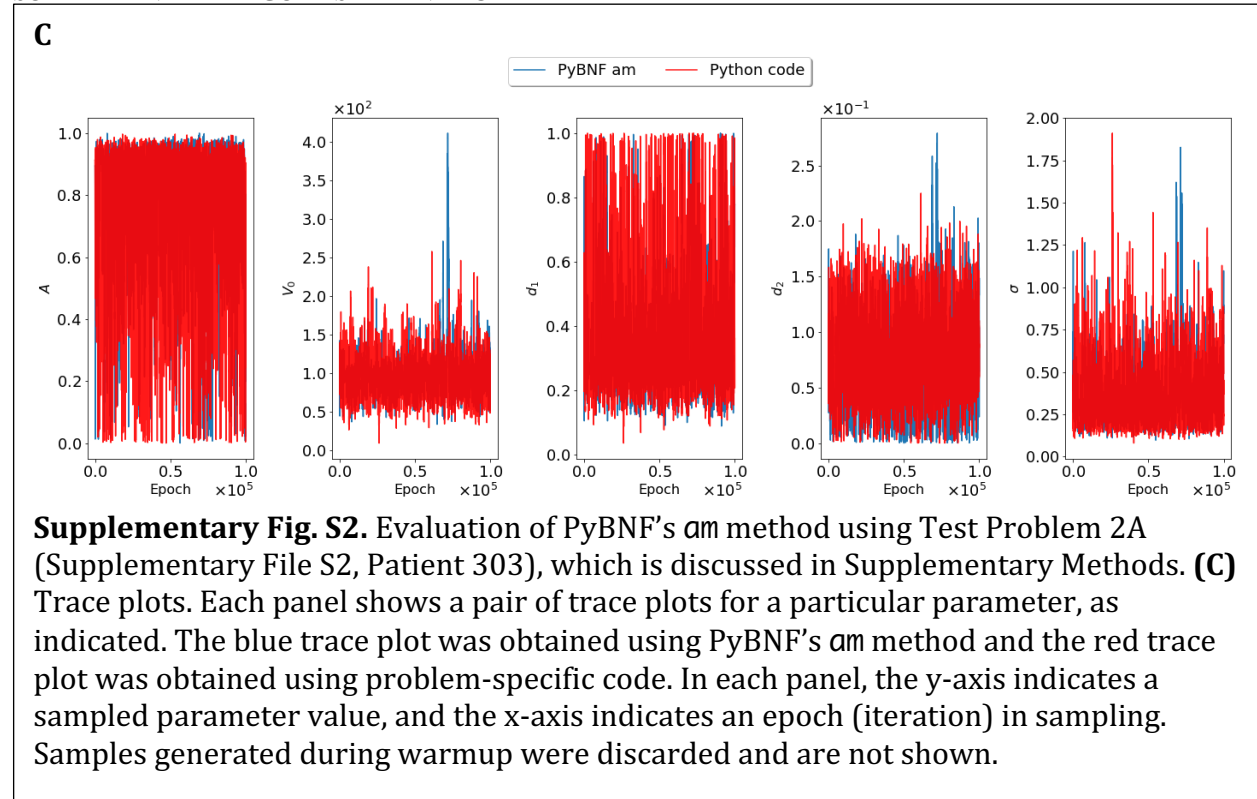



## SUPPLEMENTARY FIGURE S2 – PANEL D

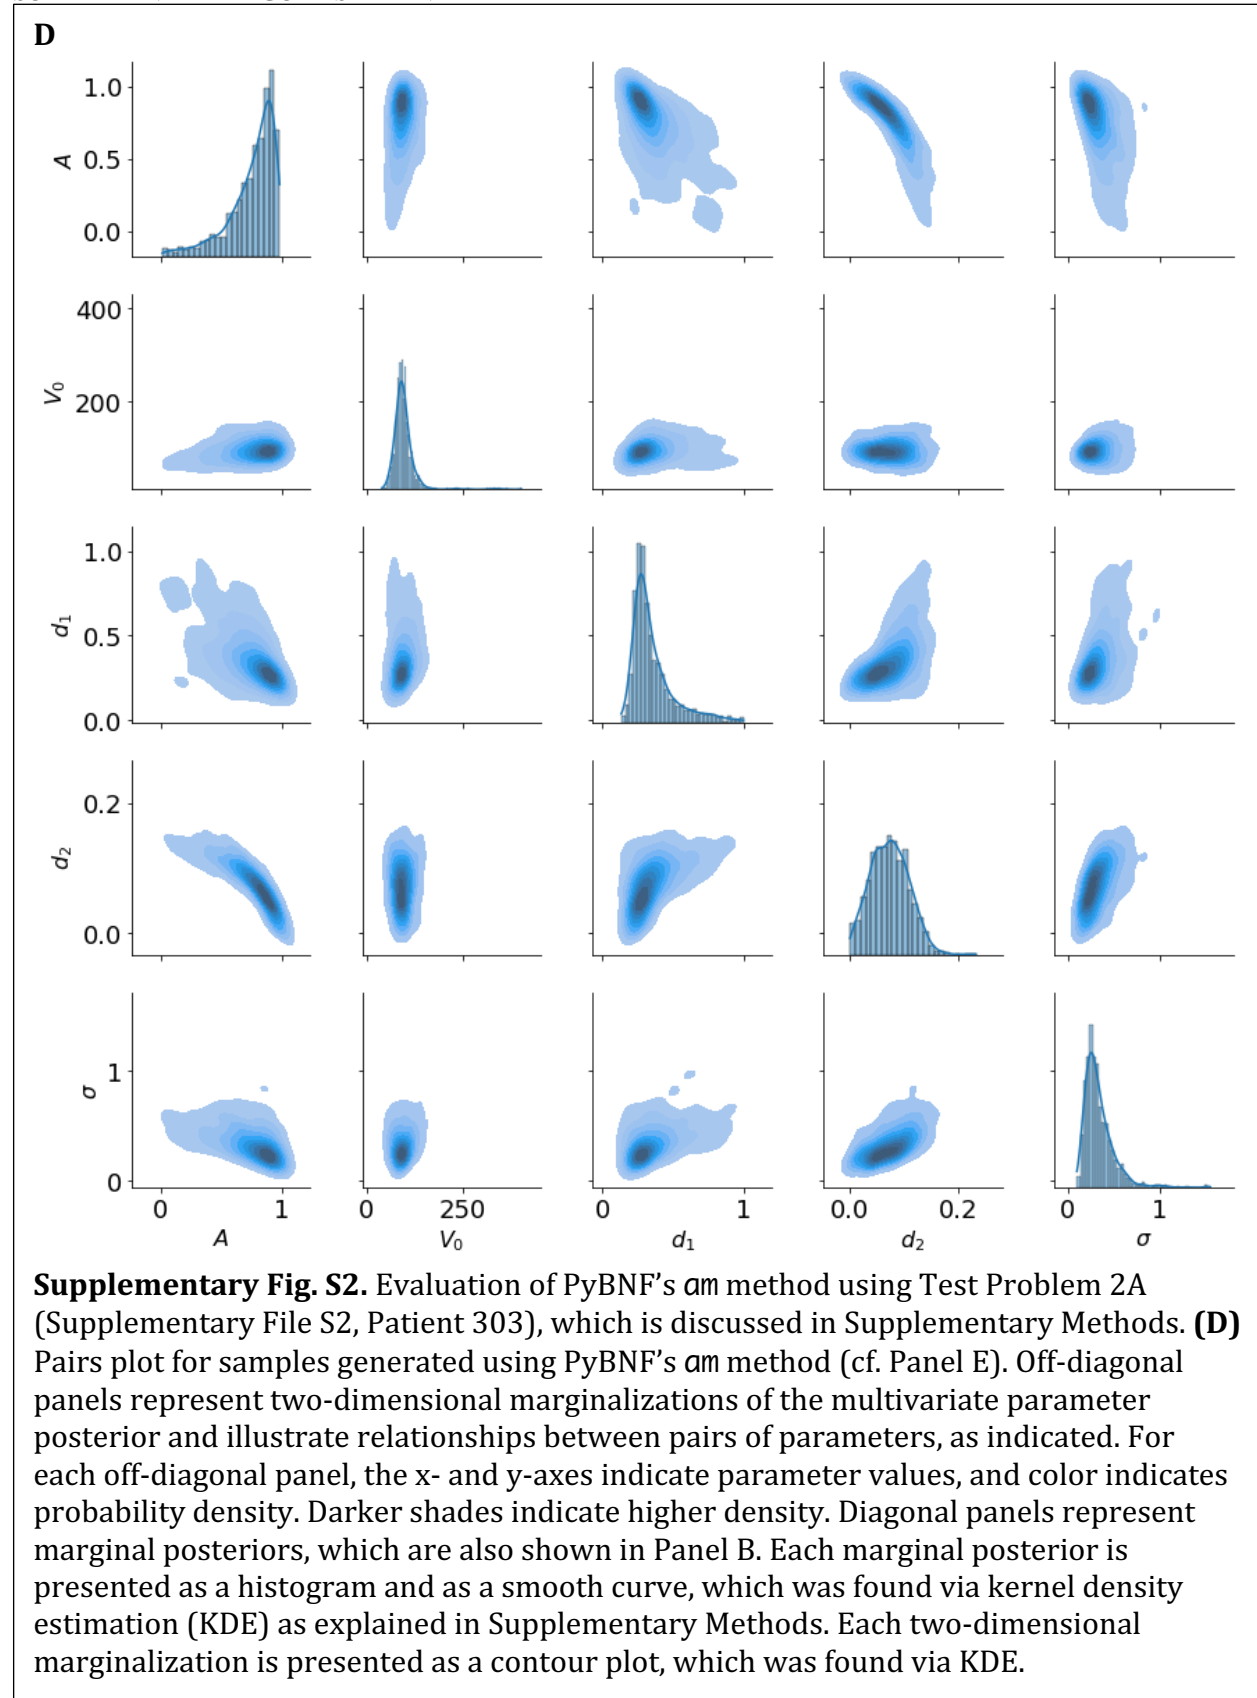

## SUPPLEMENTARY FIGURE S2 – PANEL E

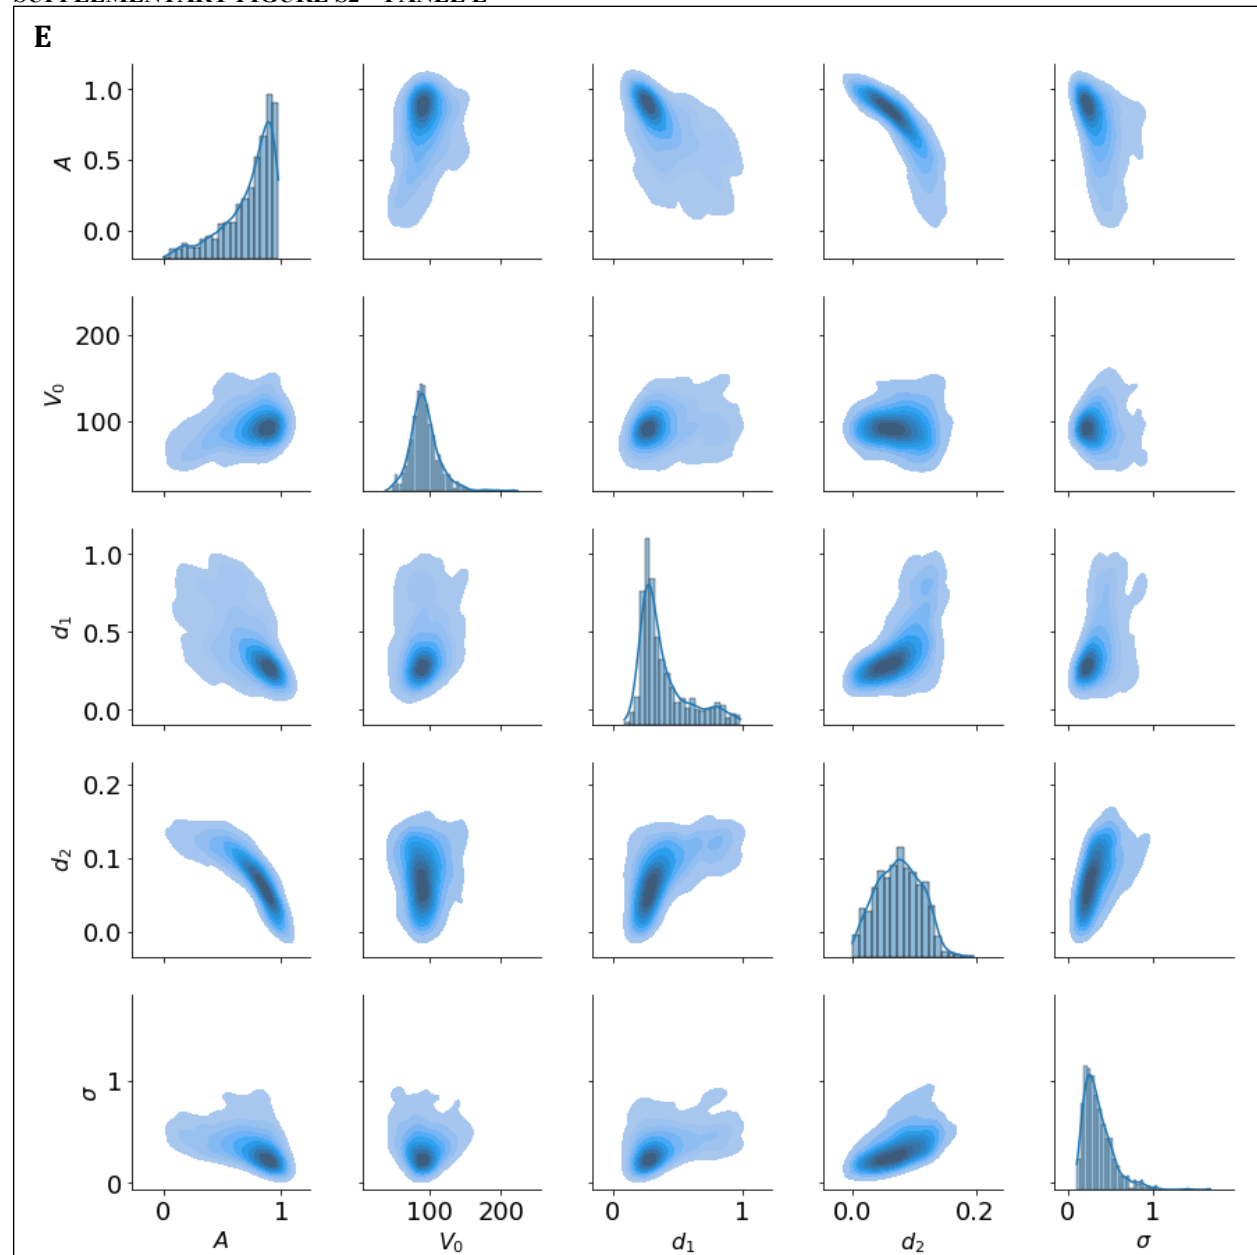

**Supplementary Fig. S2.** Evaluation of PyBNF’s *am* method using Test Problem 2A (Supplementary File S2, Patient 303), which is discussed in Supplementary Methods. **(E)** Pairs plot for samples generated using problem-specific code (cf. Panel D). Off-diagonal panels represent two-dimensional marginalizations of the multivariate parameter posterior and illustrate relationships between pairs of parameters, as indicated. For each off-diagonal panel, the x- and y-axes indicate parameter values, and color indicates probability density. Darker shades indicate higher density. Diagonal panels represent marginal posteriors, which are also shown in Panel B. Each marginal posterior is presented as a histogram and as a smooth curve, which was found via kernel density estimation (KDE) as explained in Supplementary Methods. Each two-dimensional marginalization is presented as a contour plot, which was found via KDE.

## SUPPLEMENTARY FIGURE S3 – PANEL A

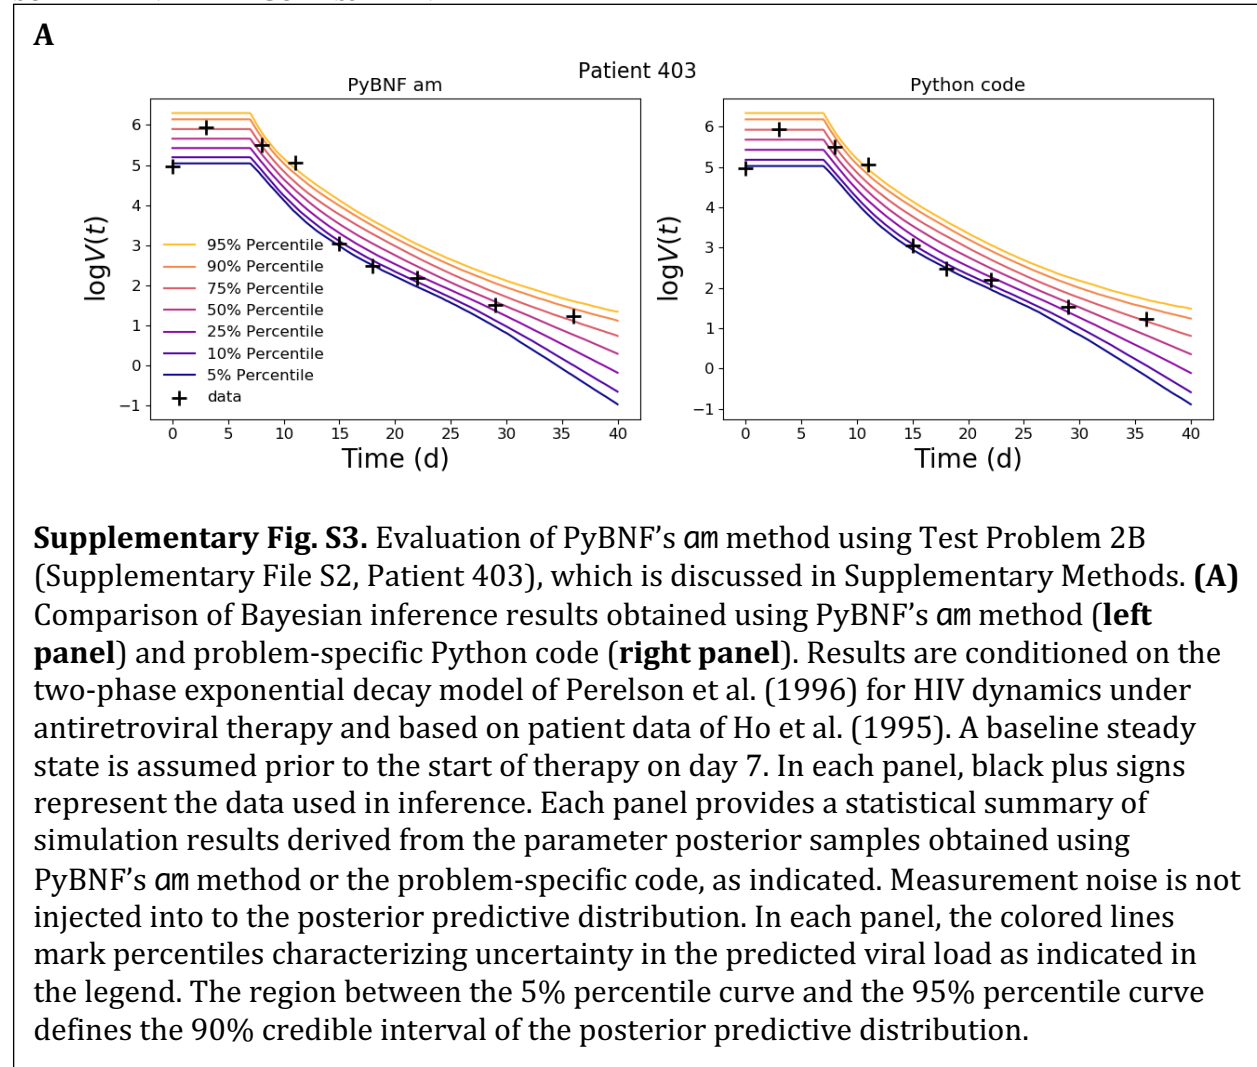

## SUPPLEMENTARY FIGURE S3 – PANEL B

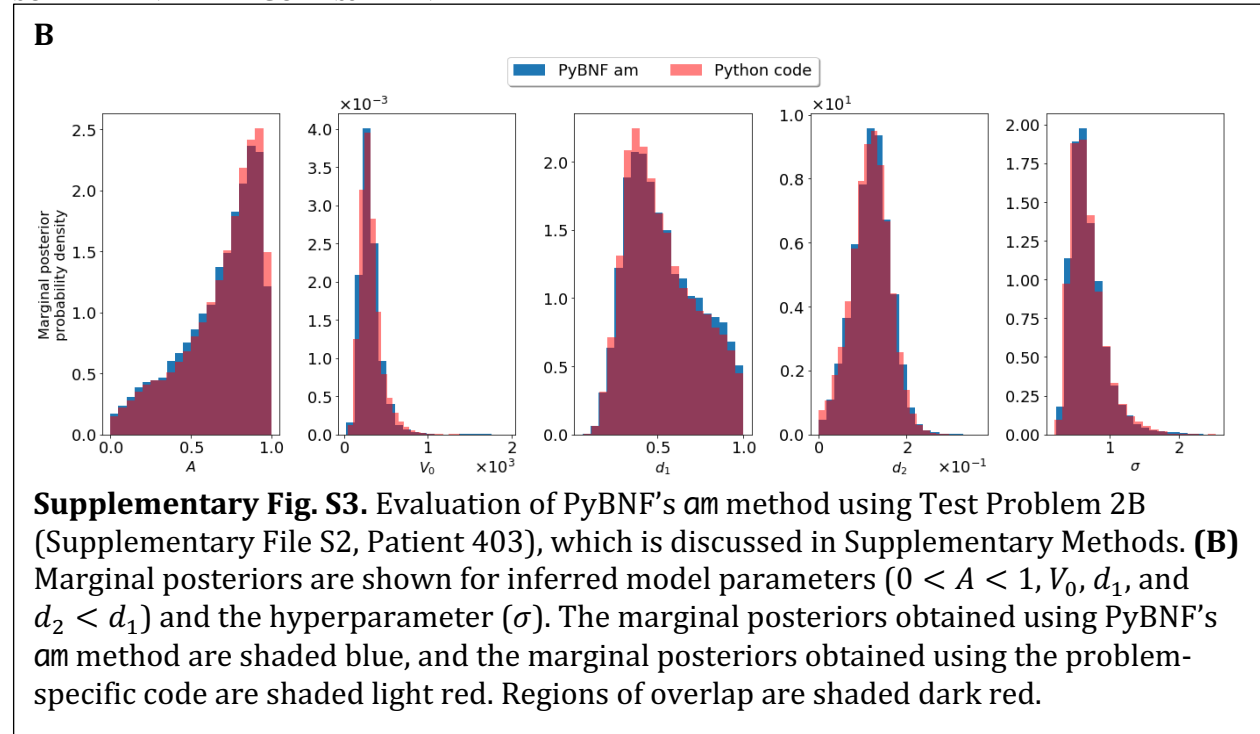

## SUPPLEMENTARY FIGURE S3 – PANEL C

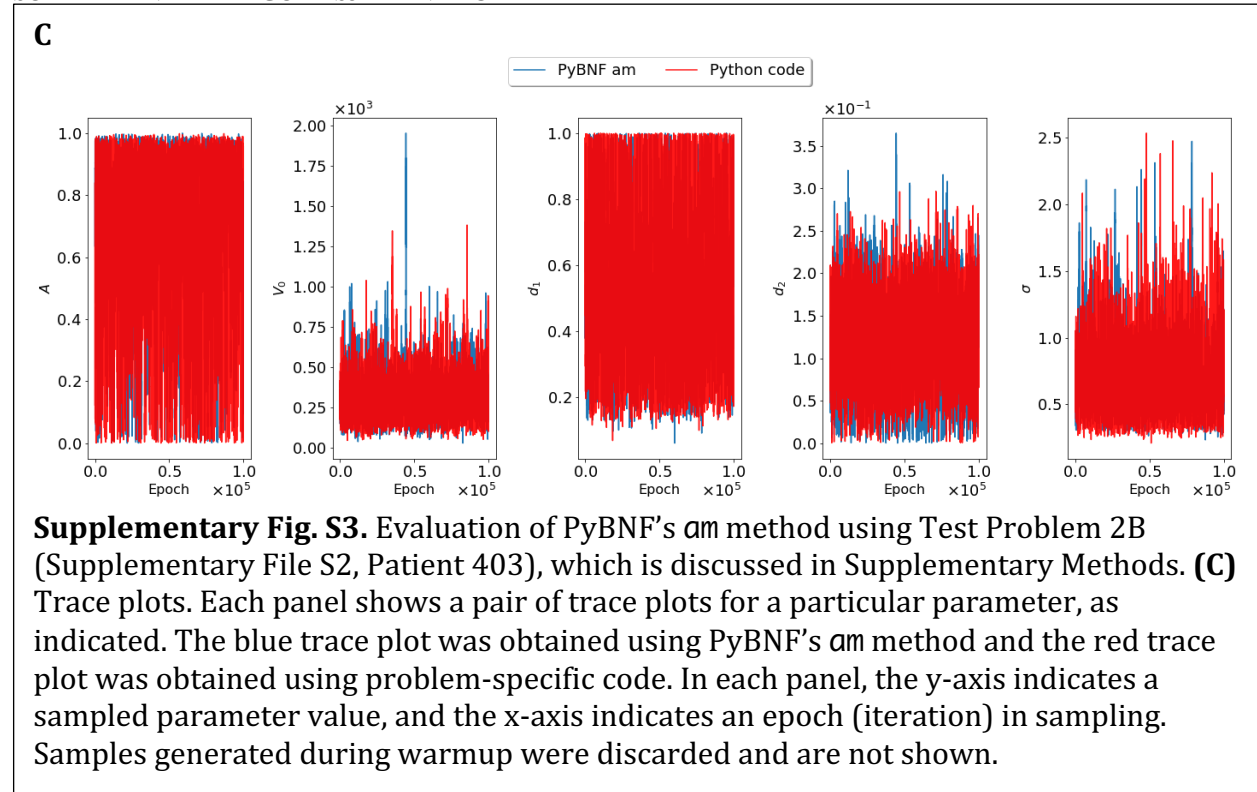

## SUPPLEMENTARY FIGURE S3 – PANEL D

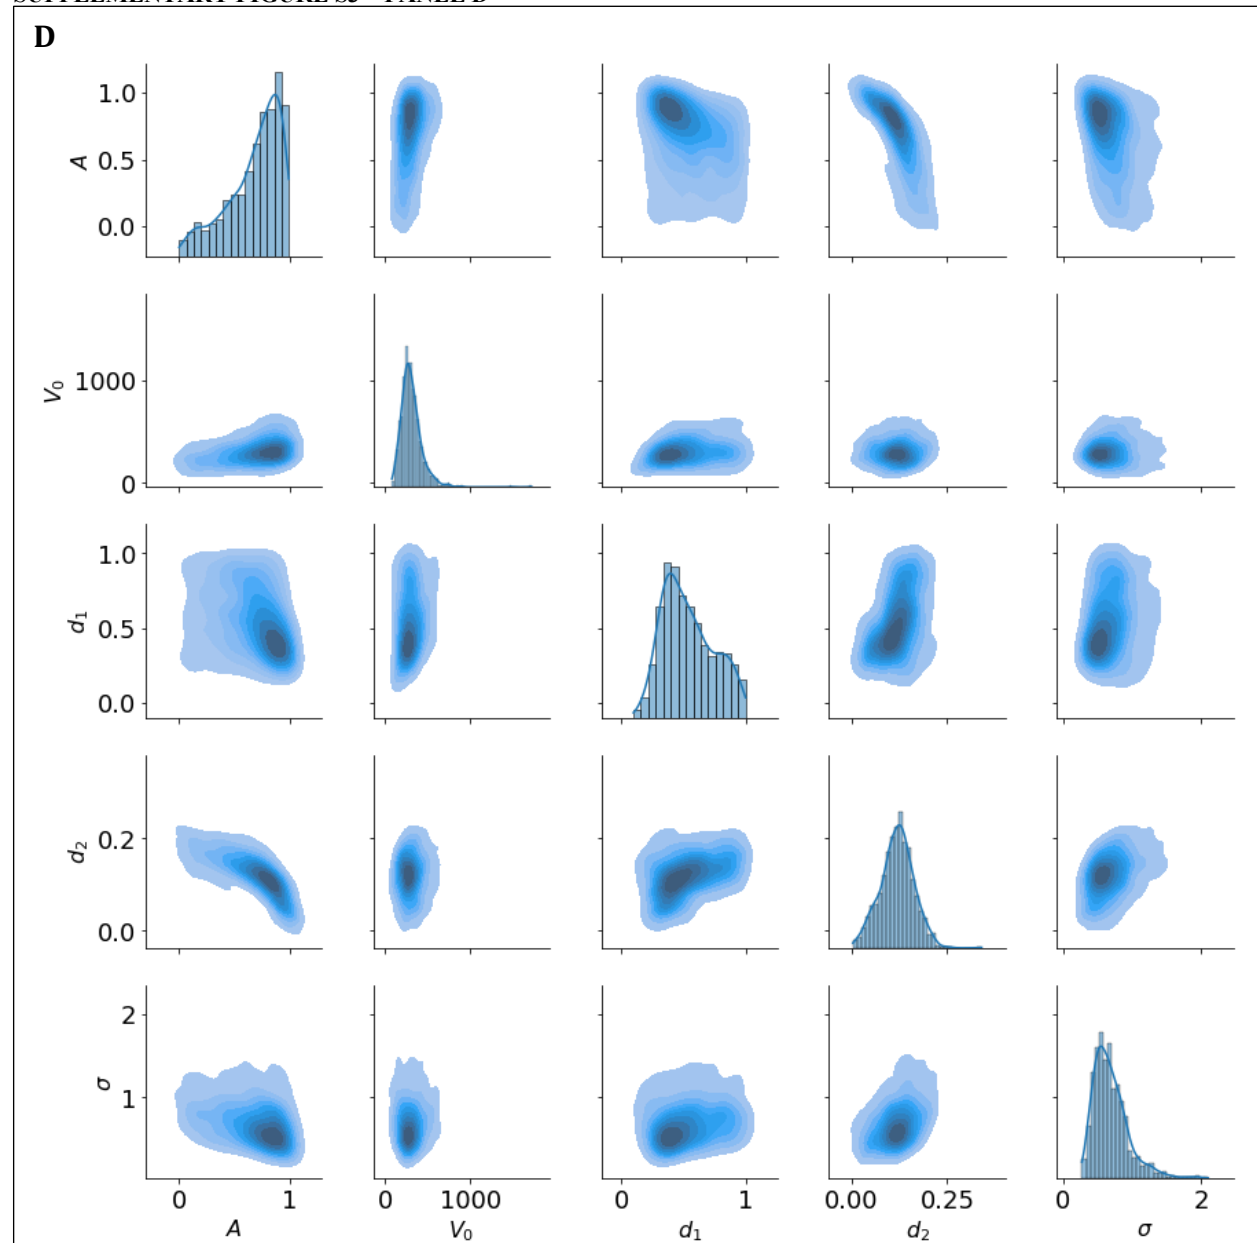

**Supplementary Fig. S3.** Evaluation of PyBNF’s `am` method using Test Problem 2B (Supplementary File S2, Patient 403), which is discussed in Supplementary Methods. **(D)** Pairs plot for samples generated using PyBNF’s `am` method (cf. Panel E). Off-diagonal panels represent two-dimensional marginalizations of the multivariate parameter posterior and illustrate relationships between pairs of parameters, as indicated. For each off-diagonal panel, the x- and y-axes indicate parameter values, and color indicates probability density. Darker shades indicate higher density. Diagonal panels represent marginal posteriors, which are also shown in Panel B. Each marginal posterior is presented as a histogram and as a smooth curve, which was found via kernel density estimation (KDE) as explained in Supplementary Methods. Each two-dimensional marginalization is presented as a contour plot, which was found via KDE.



## SUPPLEMENTARY FIGURE S3 – PANEL E

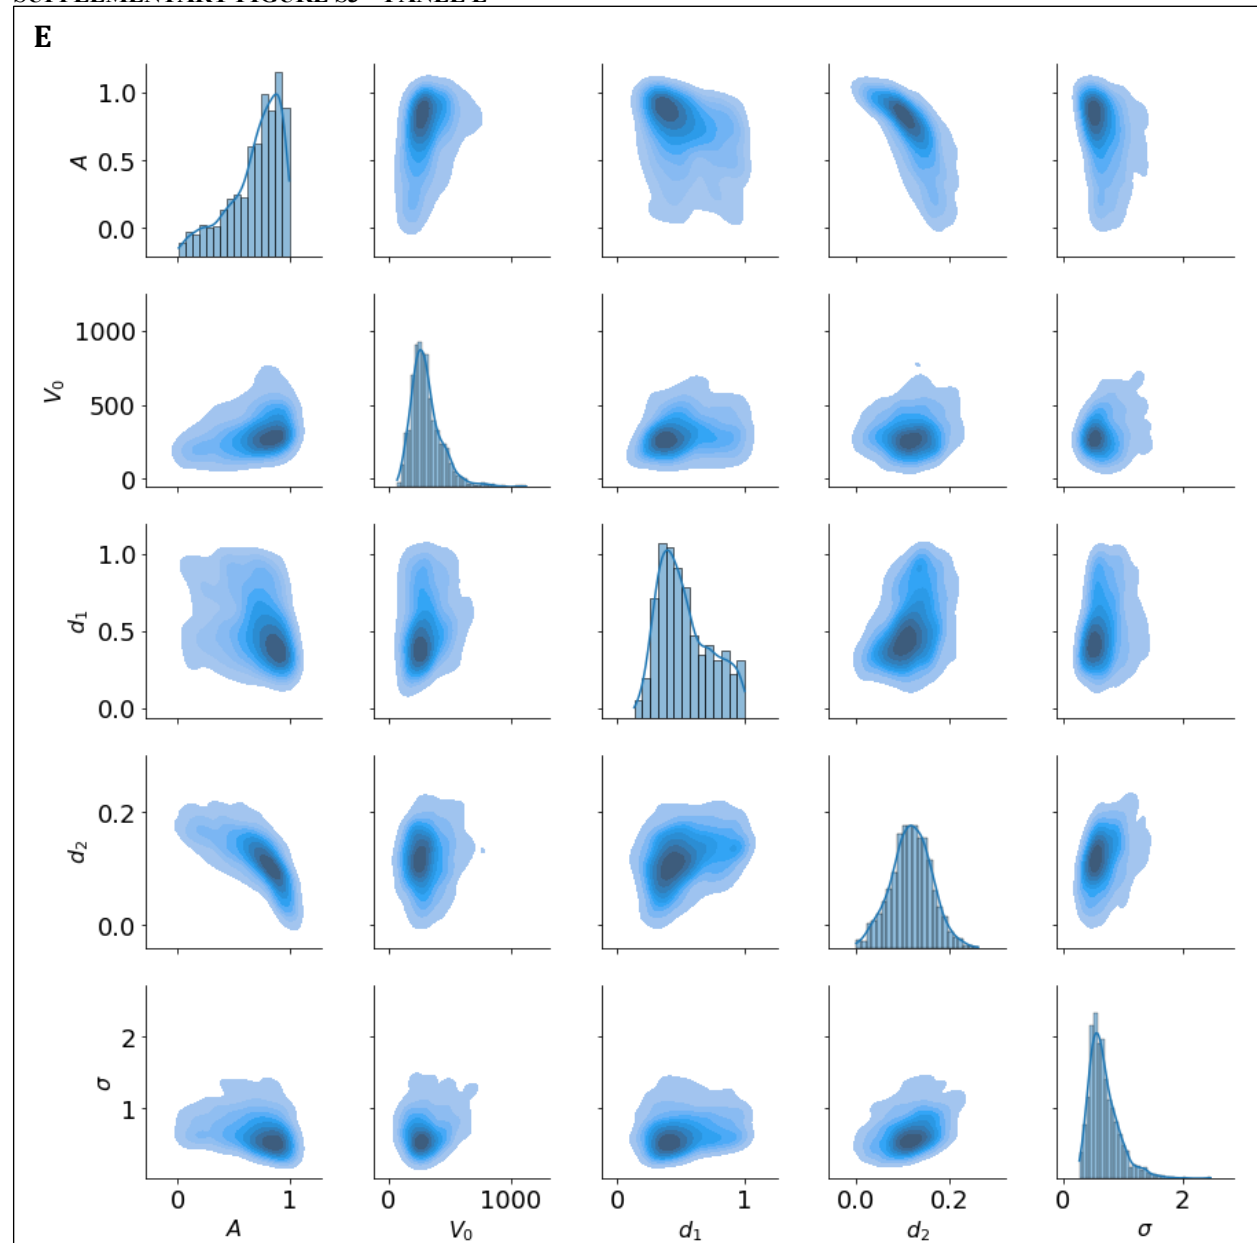

**Supplementary Fig. S3.** Evaluation of PyBNF’s `am` method using Test Problem 2B (Supplementary File S2, Patient 403), which is discussed in Supplementary Methods. **(E)** Pairs plot for samples generated using problem-specific code (cf. Panel D). Off-diagonal panels represent two-dimensional marginalizations of the multivariate parameter posterior and illustrate relationships between pairs of parameters, as indicated. For each off-diagonal panel, the x- and y-axes indicate parameter values, and color indicates probability density. Darker shades indicate higher density. Diagonal panels represent marginal posteriors, which are also shown in Panel B. Each marginal posterior is presented as a histogram and as a smooth curve, which was found via kernel density estimation (KDE) as explained in Supplementary Methods. Each two-dimensional marginalization is presented as a contour plot, which was found via KDE.

## SUPPLEMENTARY FIGURE S4 – PANEL A

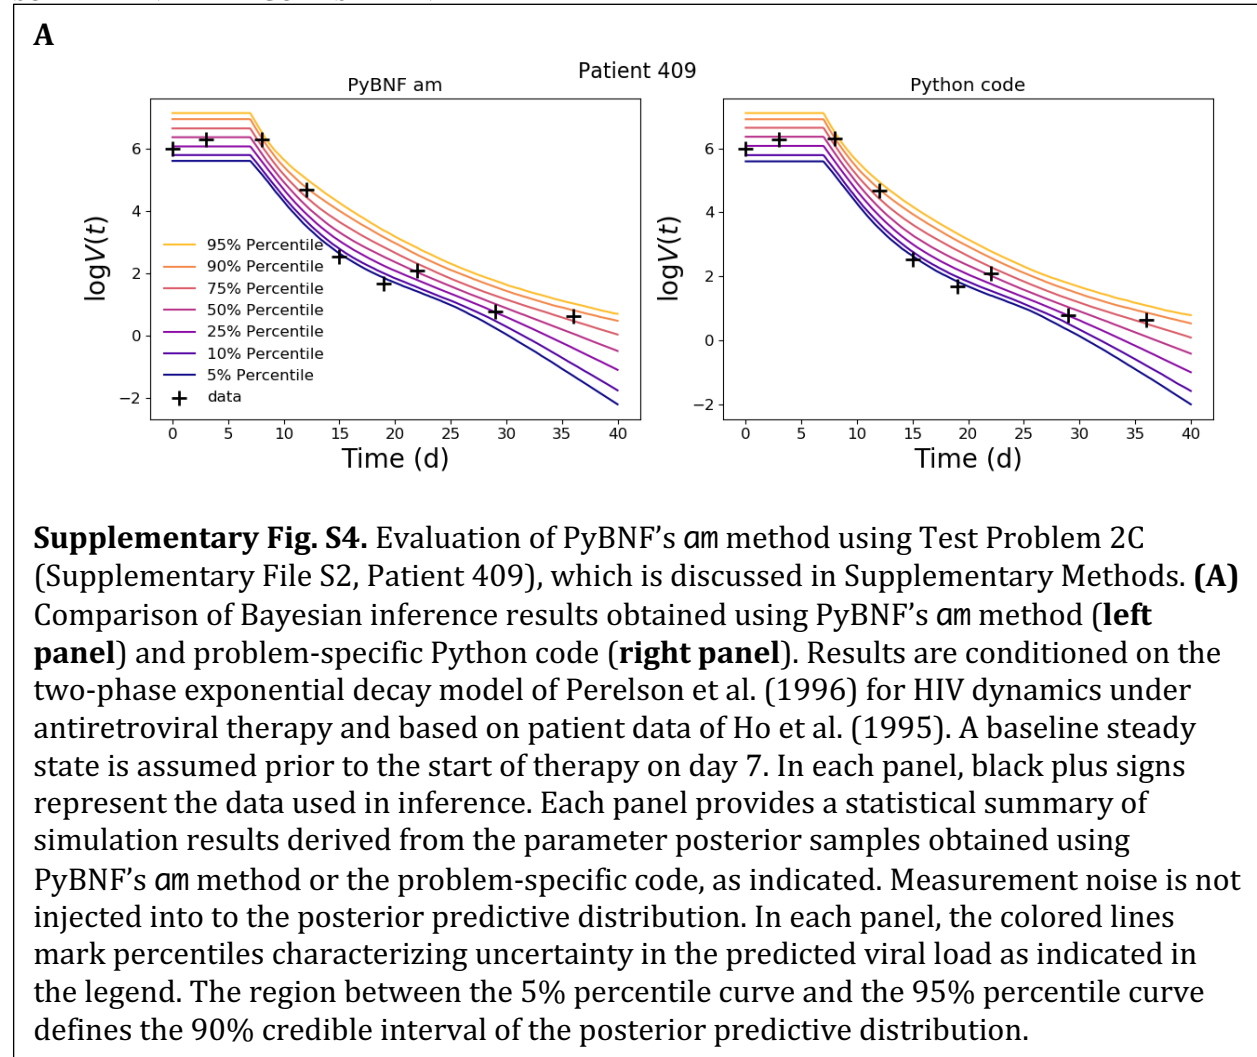

## SUPPLEMENTARY FIGURE S4 – PANEL B

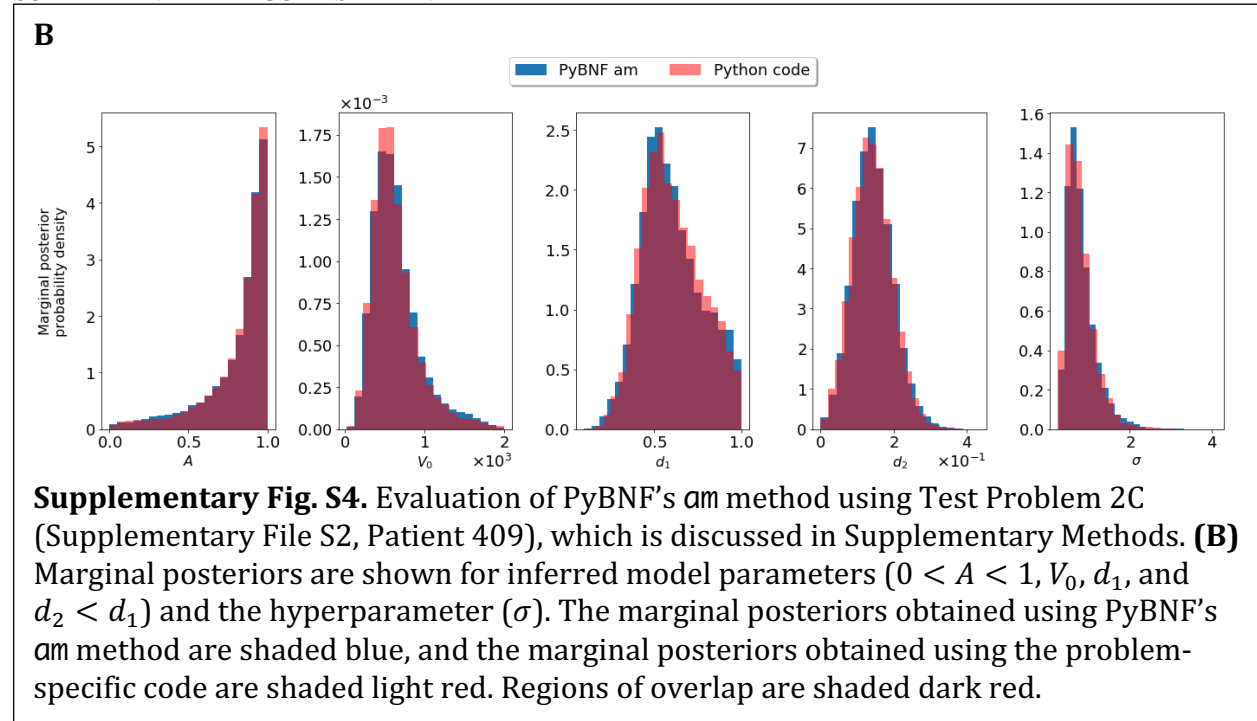

## SUPPLEMENTARY FIGURE S4 – PANEL C

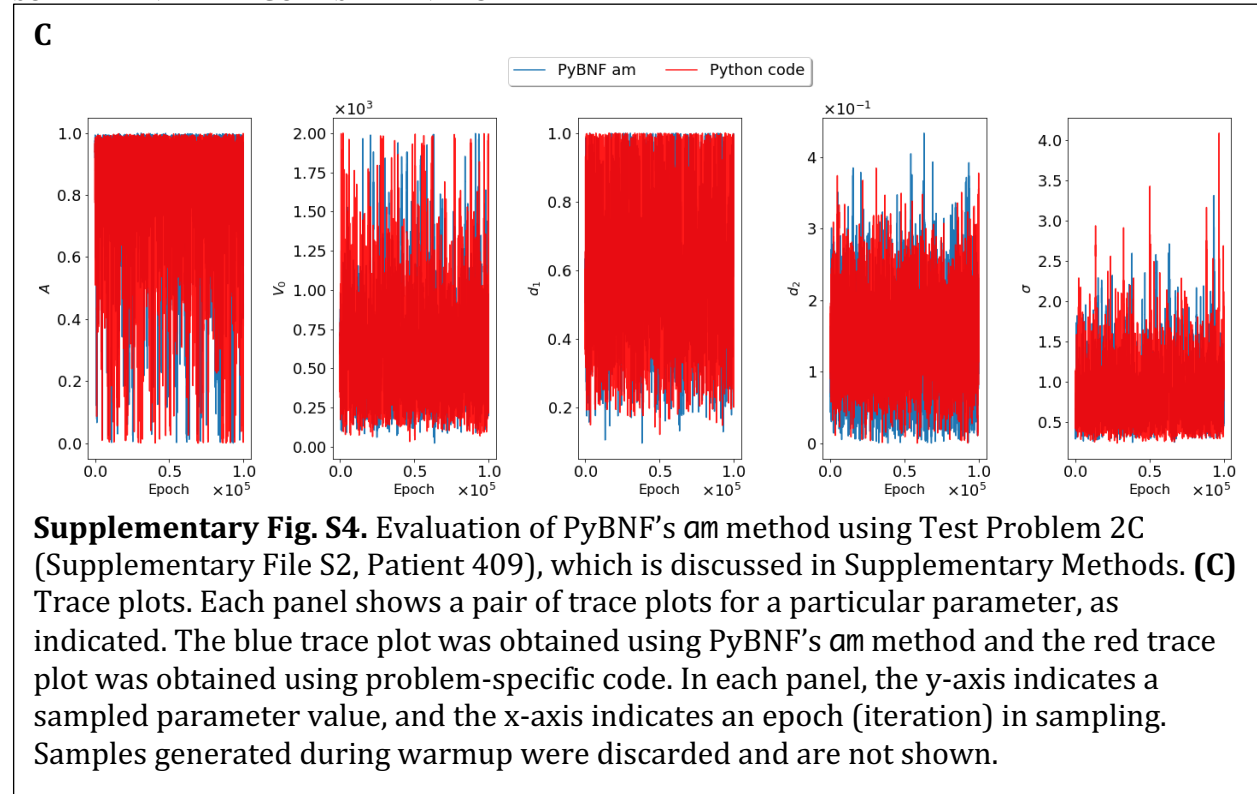

## SUPPLEMENTARY FIGURE S4 – PANEL D

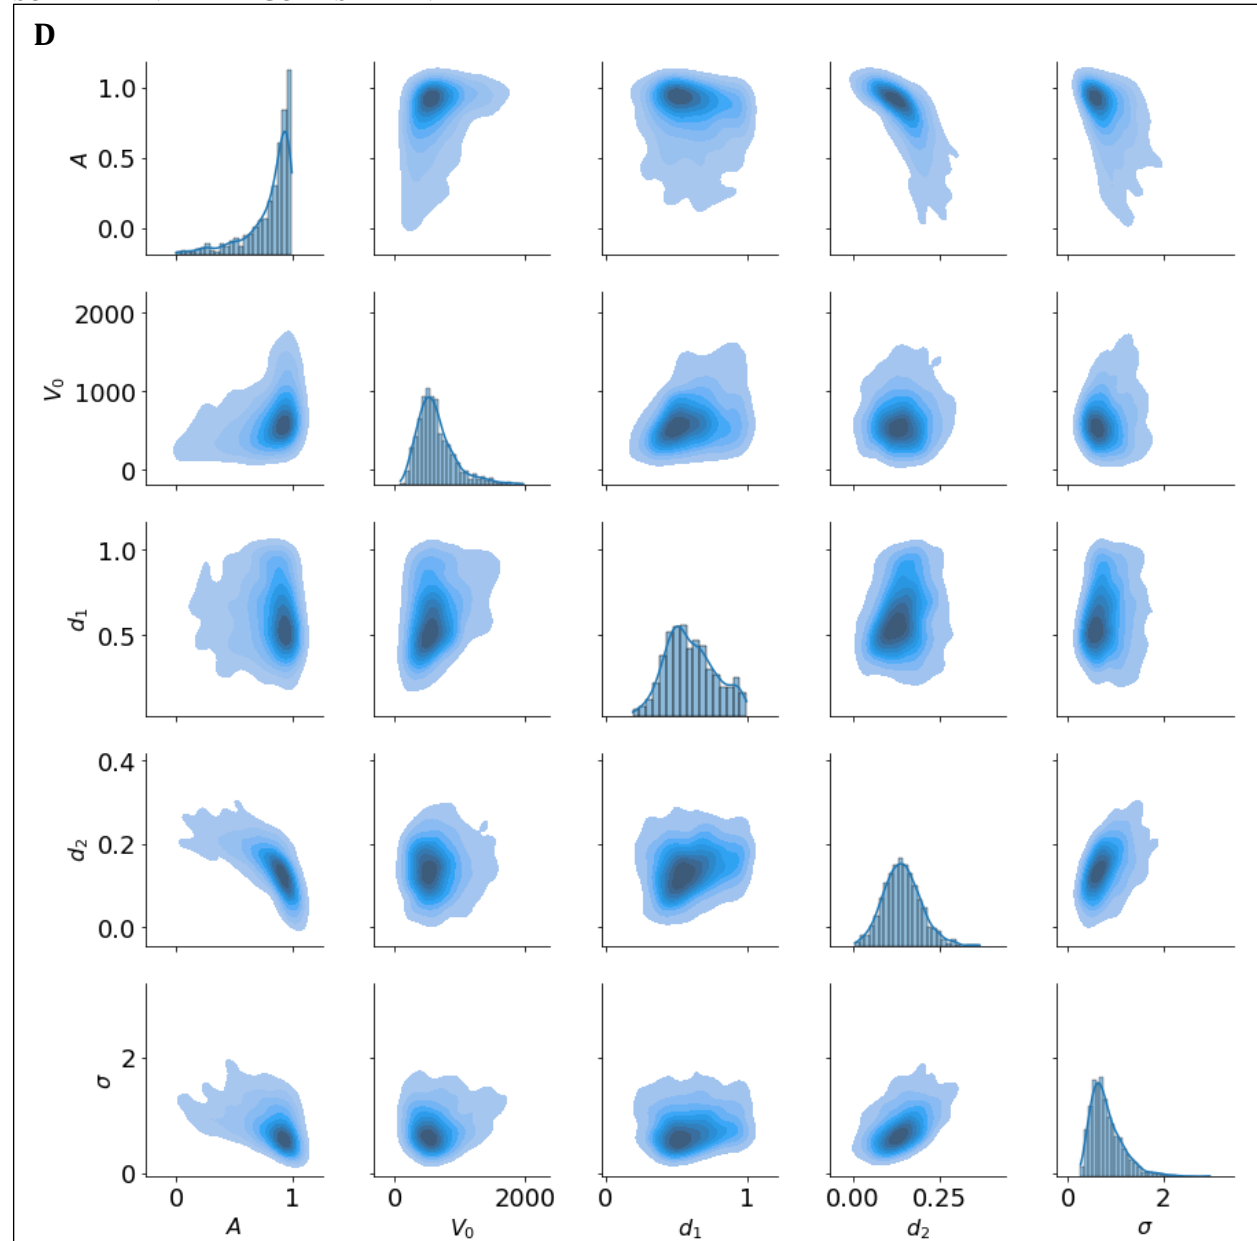

**Supplementary Fig. S4.** Evaluation of PyBNF’s `am` method using Test Problem 2C (Supplementary File S2, Patient 409), which is discussed in Supplementary Methods. **(D)** Pairs plot for samples generated using PyBNF’s `am` method (cf. Panel E). Off-diagonal panels represent two-dimensional marginalizations of the multivariate parameter posterior and illustrate relationships between pairs of parameters, as indicated. For each off-diagonal panel, the x- and y-axes indicate parameter values, and color indicates probability density. Darker shades indicate higher density. Diagonal panels represent marginal posteriors, which are also shown in Panel B. Each marginal posterior is presented as a histogram and as a smooth curve, which was found via kernel density estimation (KDE) as explained in Supplementary Methods. Each two-dimensional marginalization is presented as a contour plot, which was found via KDE.

## SUPPLEMENTARY FIGURE S4 – PANEL E

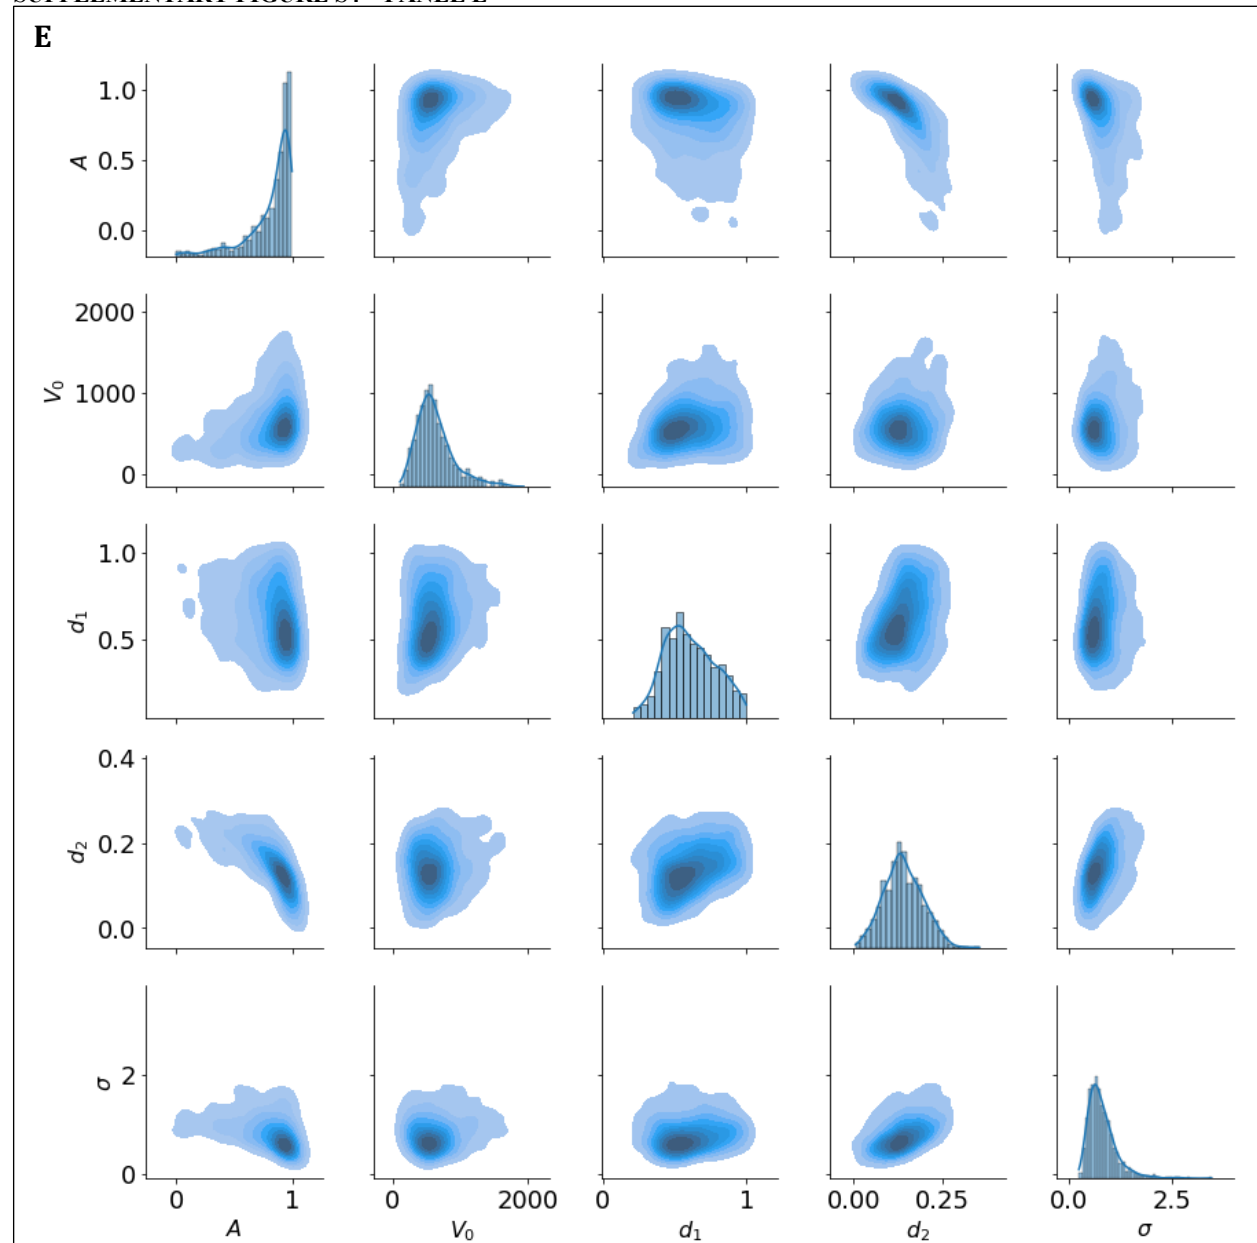

**Supplementary Fig. S4.** Evaluation of PyBNF’s `am` method using Test Problem 2C (Supplementary File S2, Patient 409), which is discussed in Supplementary Methods. **(E)** Pairs plot for samples generated using problem-specific code (cf. Panel D). Off-diagonal panels represent two-dimensional marginalizations of the multivariate parameter posterior and illustrate relationships between pairs of parameters, as indicated. For each off-diagonal panel, the x- and y-axes indicate parameter values, and color indicates probability density. Darker shades indicate higher density. Diagonal panels represent marginal posteriors, which are also shown in Panel B. Each marginal posterior is presented as a histogram and as a smooth curve, which was found via kernel density estimation (KDE) as explained in Supplementary Methods. Each two-dimensional marginalization is presented as a contour plot, which was found via KDE.



## SUPPLEMENTARY FIGURE S5 – PANEL A

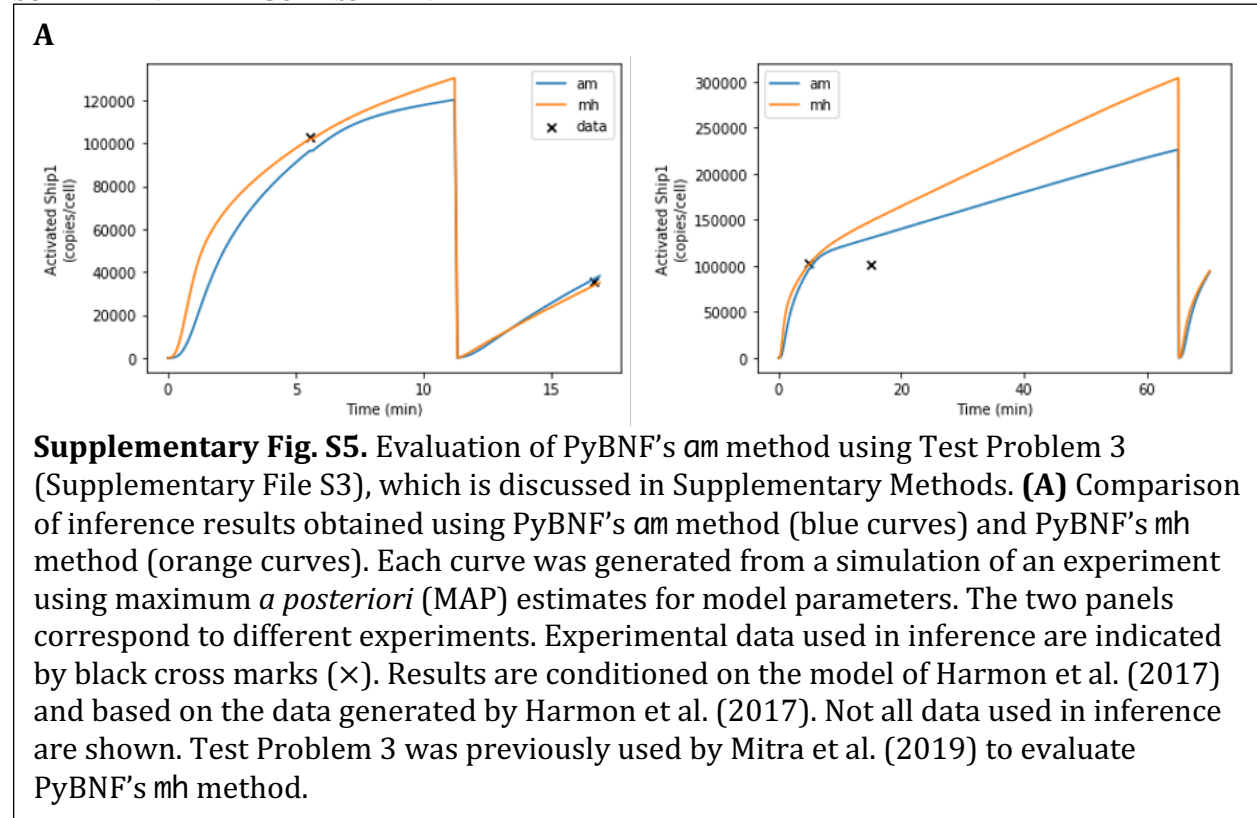

## SUPPLEMENTARY FIGURE S5 – PANEL B

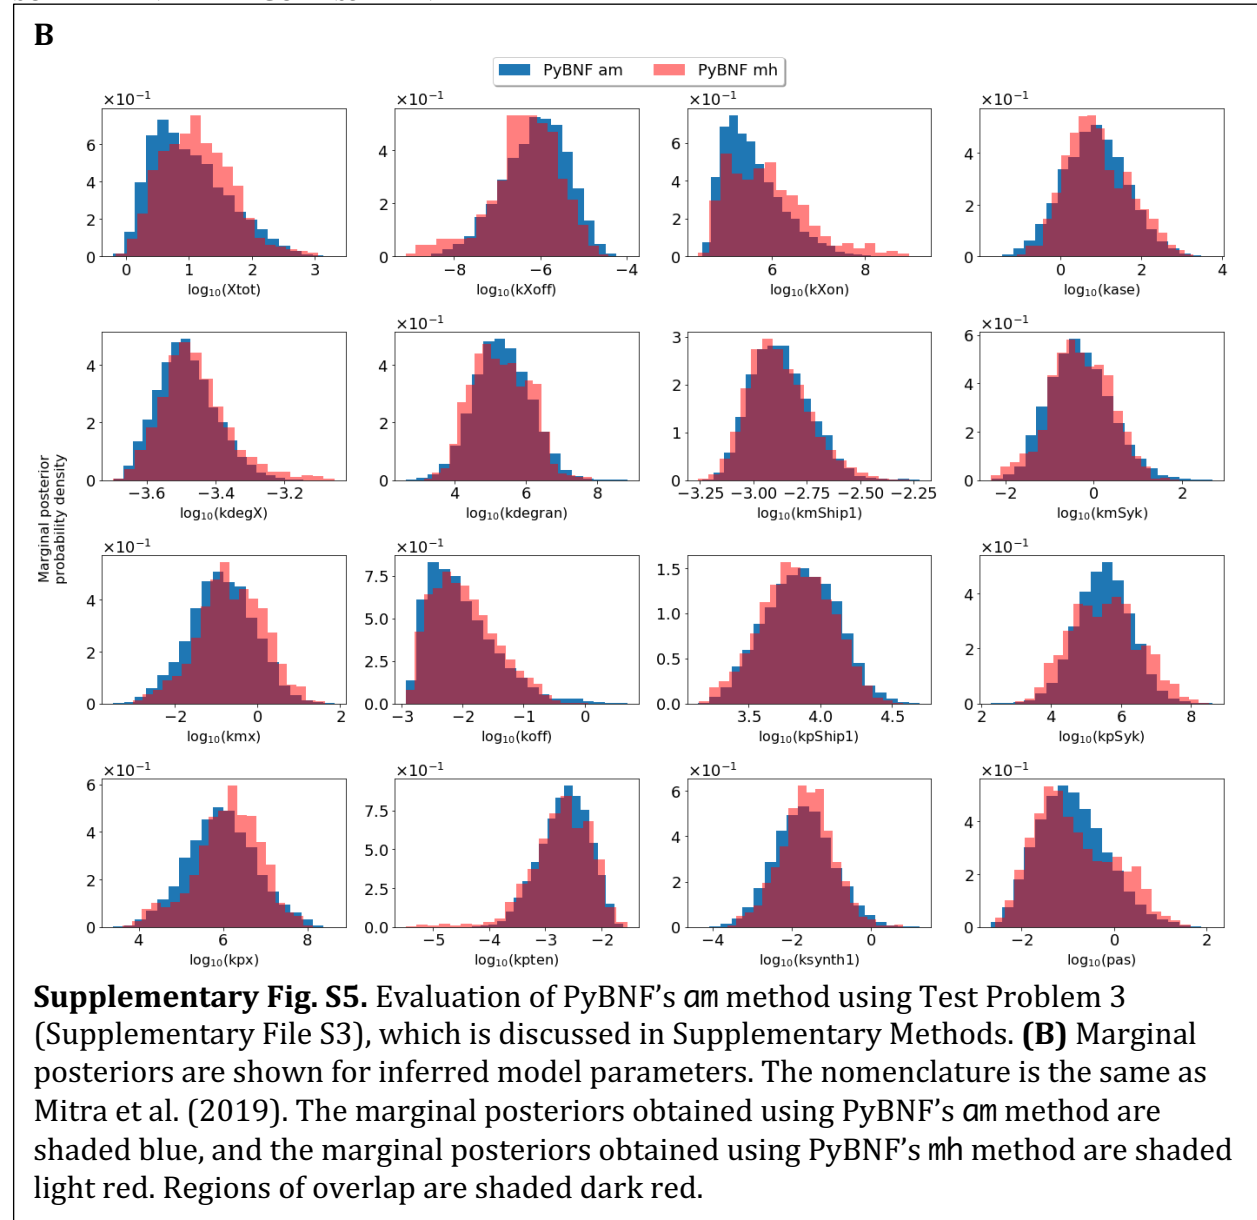

## SUPPLEMENTARY FIGURE S5 – PANEL C

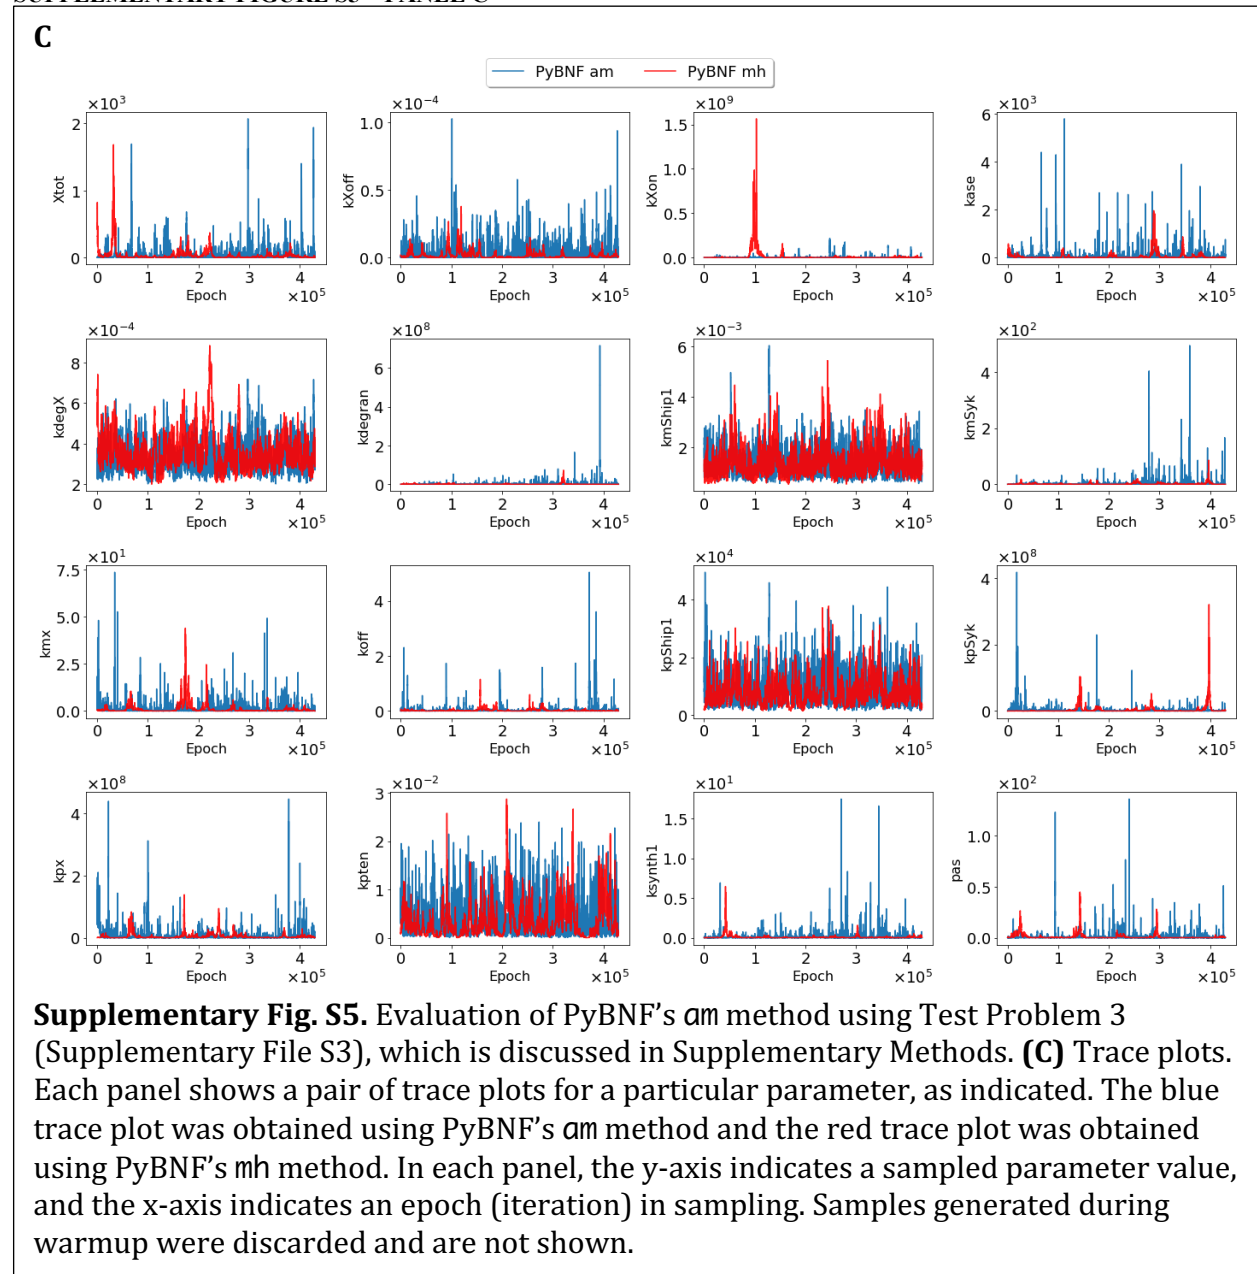

## SUPPLEMENTARY FIGURE S5 – PANEL D

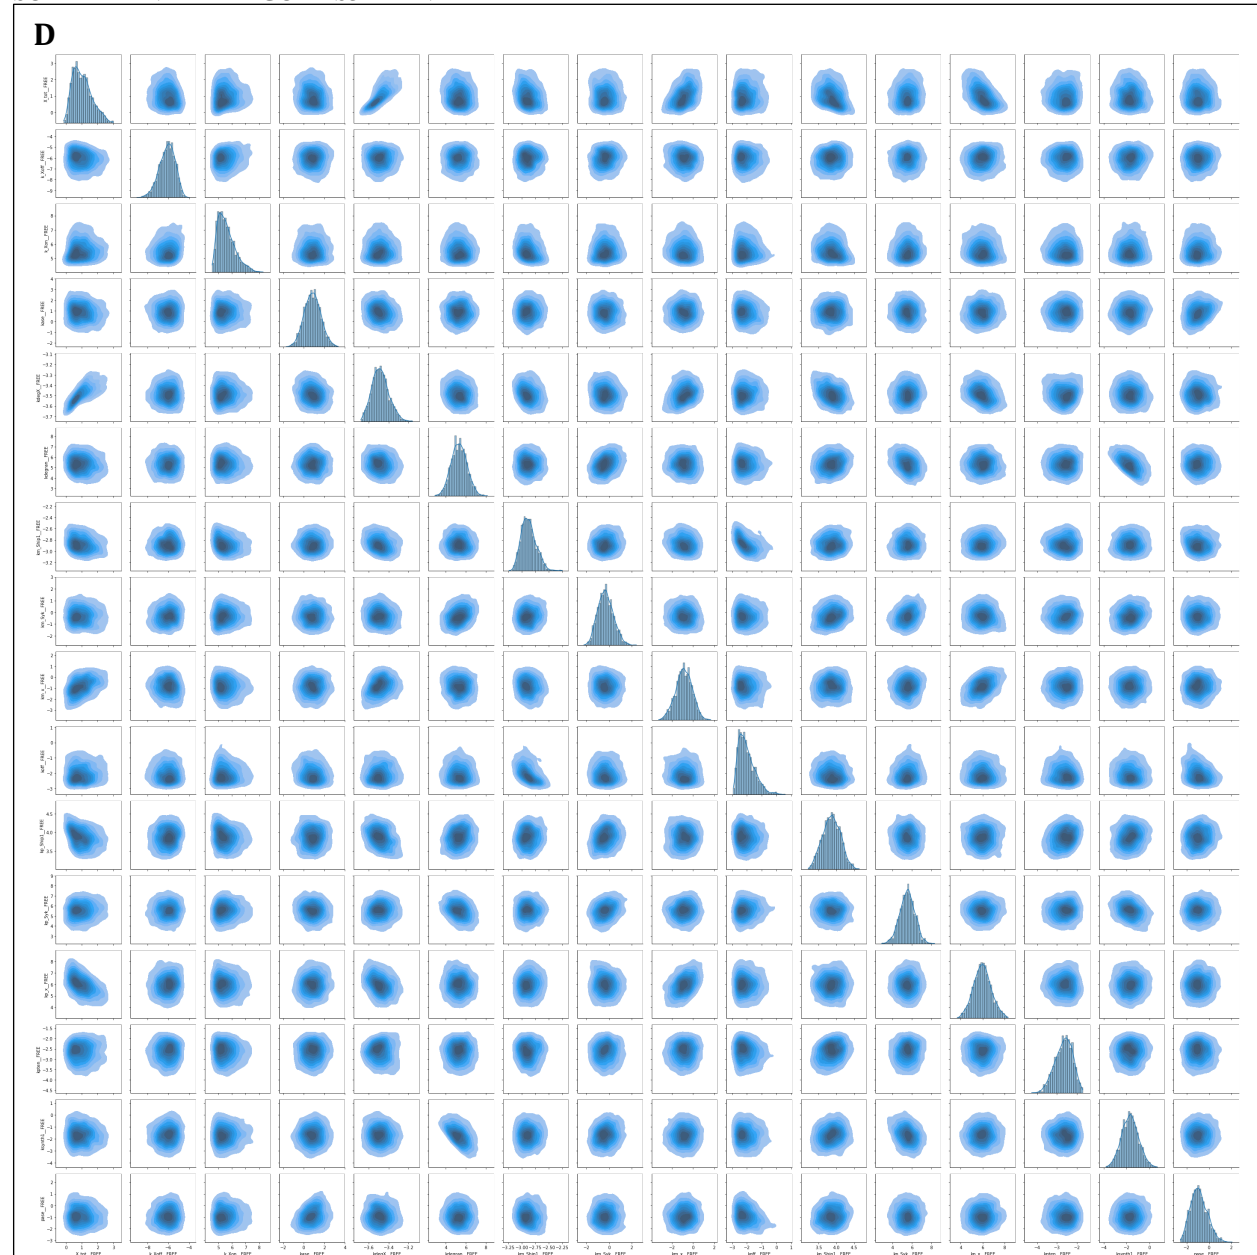

**Supplementary Fig. S5.** Evaluation of PyBNF’s *am* method using Test Problem 3 (Supplementary File S3), which is discussed in Supplementary Methods. **(D)** Pairs plot for samples generated using PyBNF’s *am* method (cf. Panel E). Off-diagonal panels represent two-dimensional marginalizations of the multivariate parameter posterior and illustrate relationships between pairs of parameters, as indicated. For each off-diagonal panel, the x- and y-axes indicate parameter values, and color indicates probability density. Darker shades indicate higher density. Diagonal panels represent marginal posteriors, which are also shown in Panel B. Each marginal posterior is presented as a histogram and as a smooth curve, which was found via kernel density estimation (KDE) as explained in Supplementary Methods. Each two-dimensional marginalization is presented as a contour plot, which was found via KDE.

## SUPPLEMENTARY FIGURE S5 – PANEL E

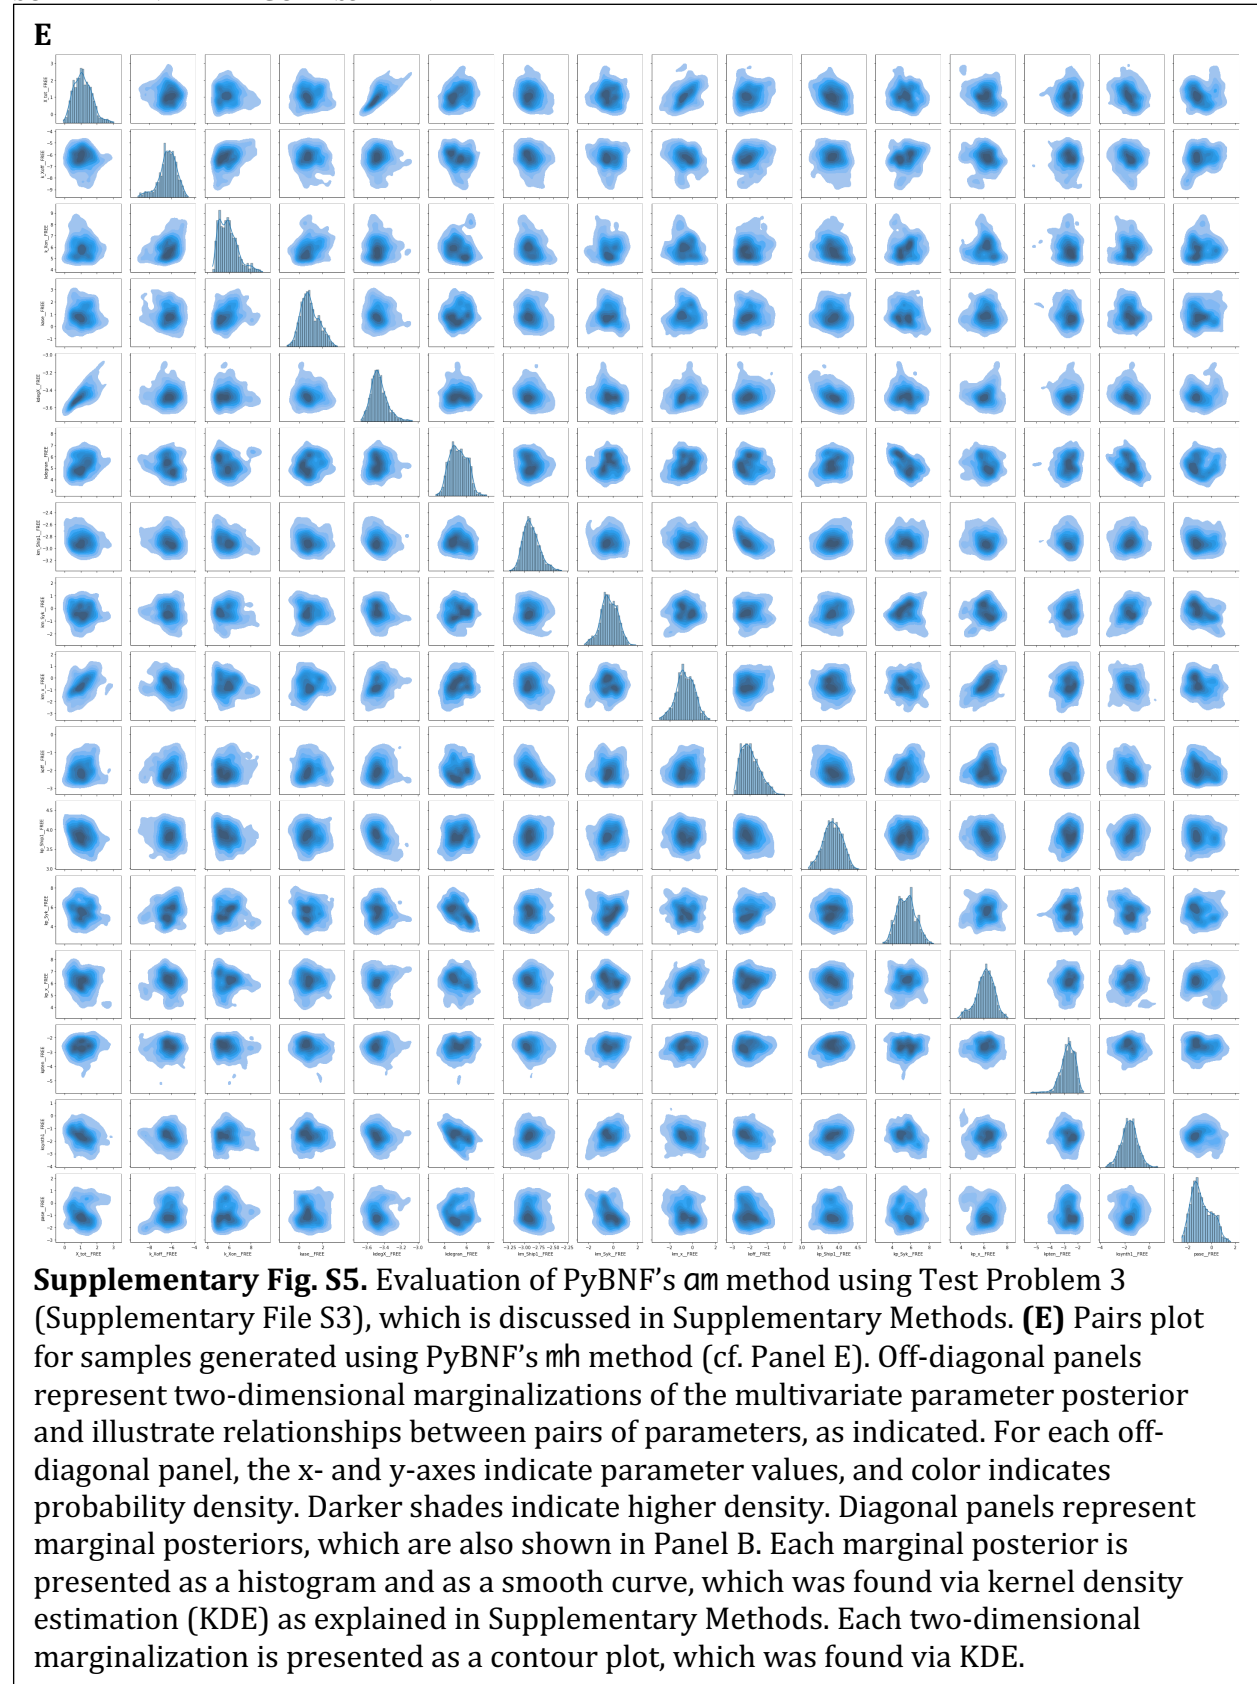

## SUPPLEMENTARY FIGURE S6 – PANEL A

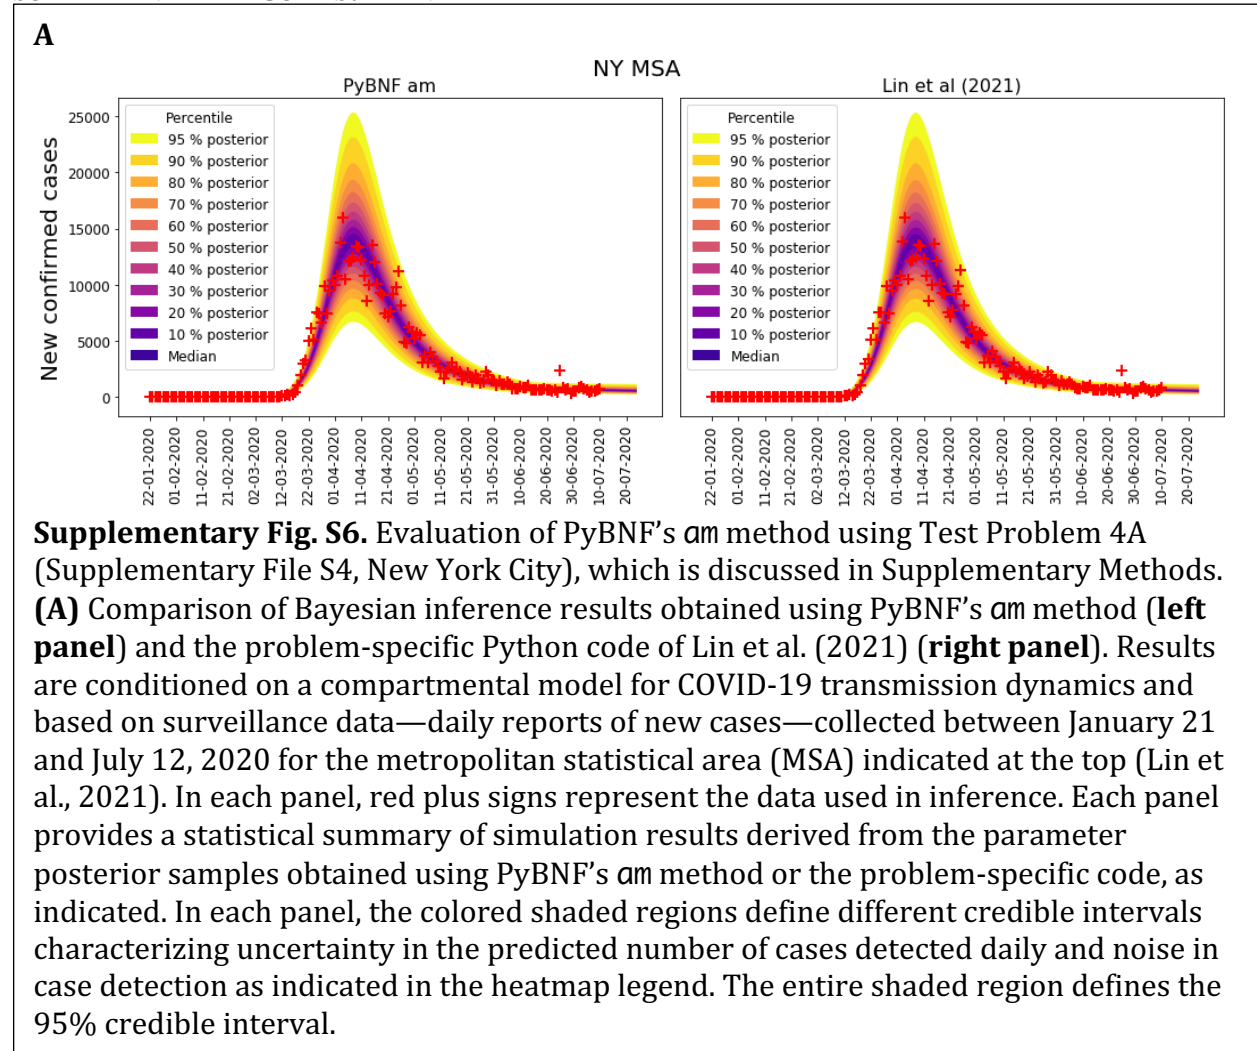

## SUPPLEMENTARY FIGURE S6 – PANEL B

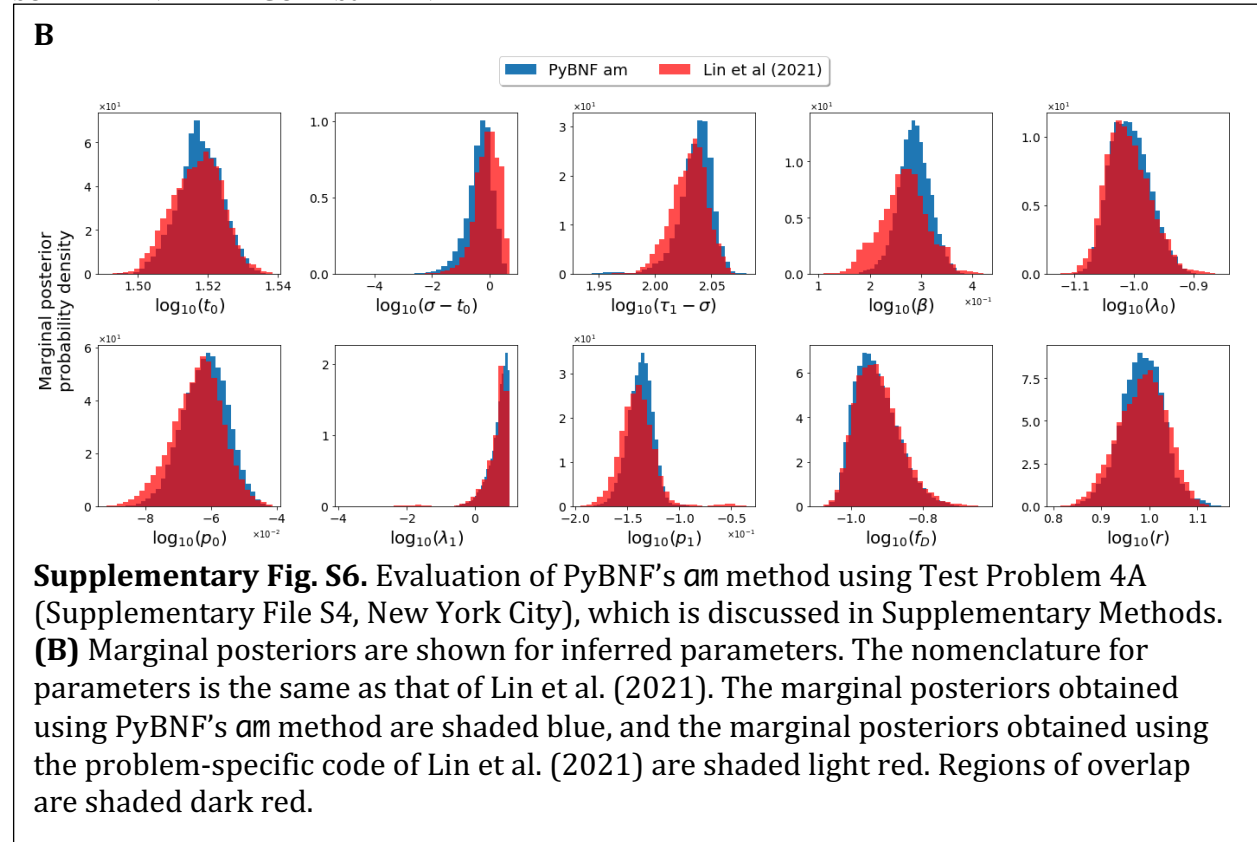

## SUPPLEMENTARY FIGURE S6 – PANEL C

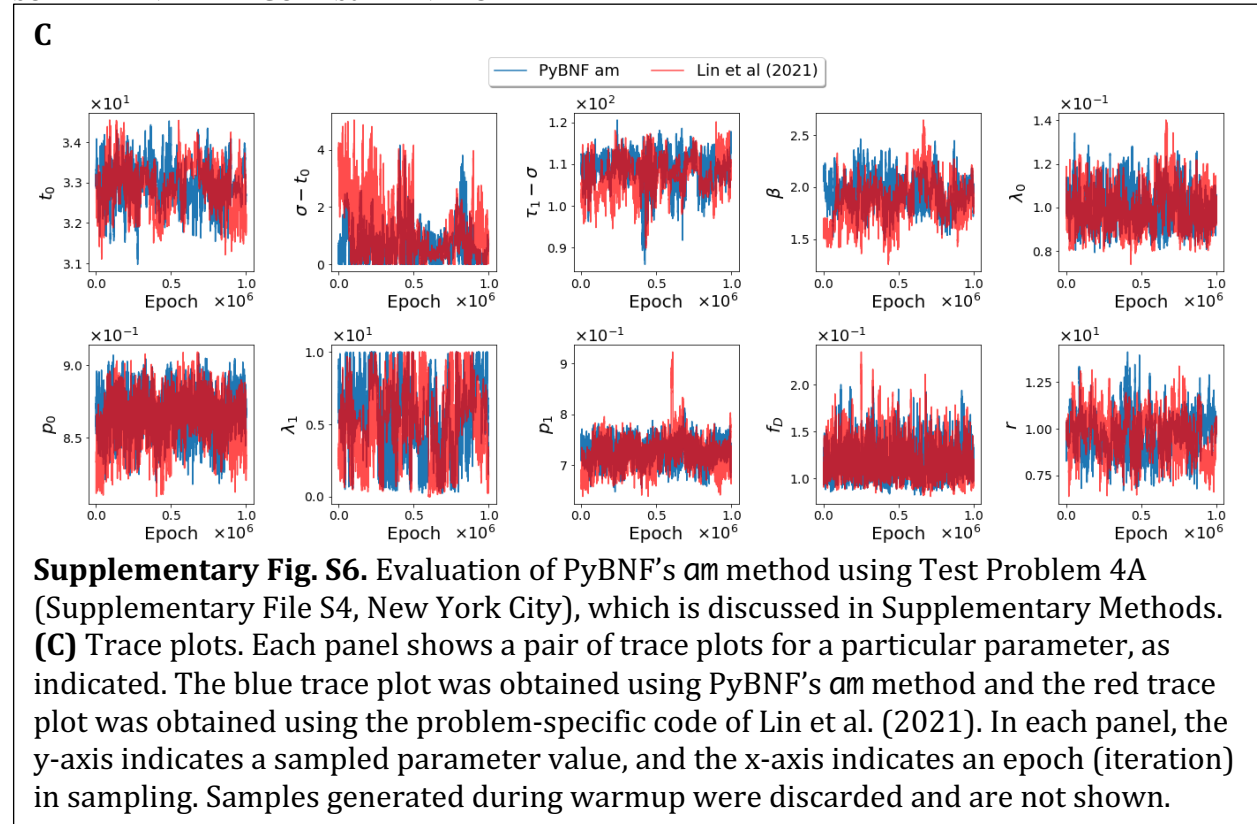



## SUPPLEMENTARY FIGURE S6 – PANEL D

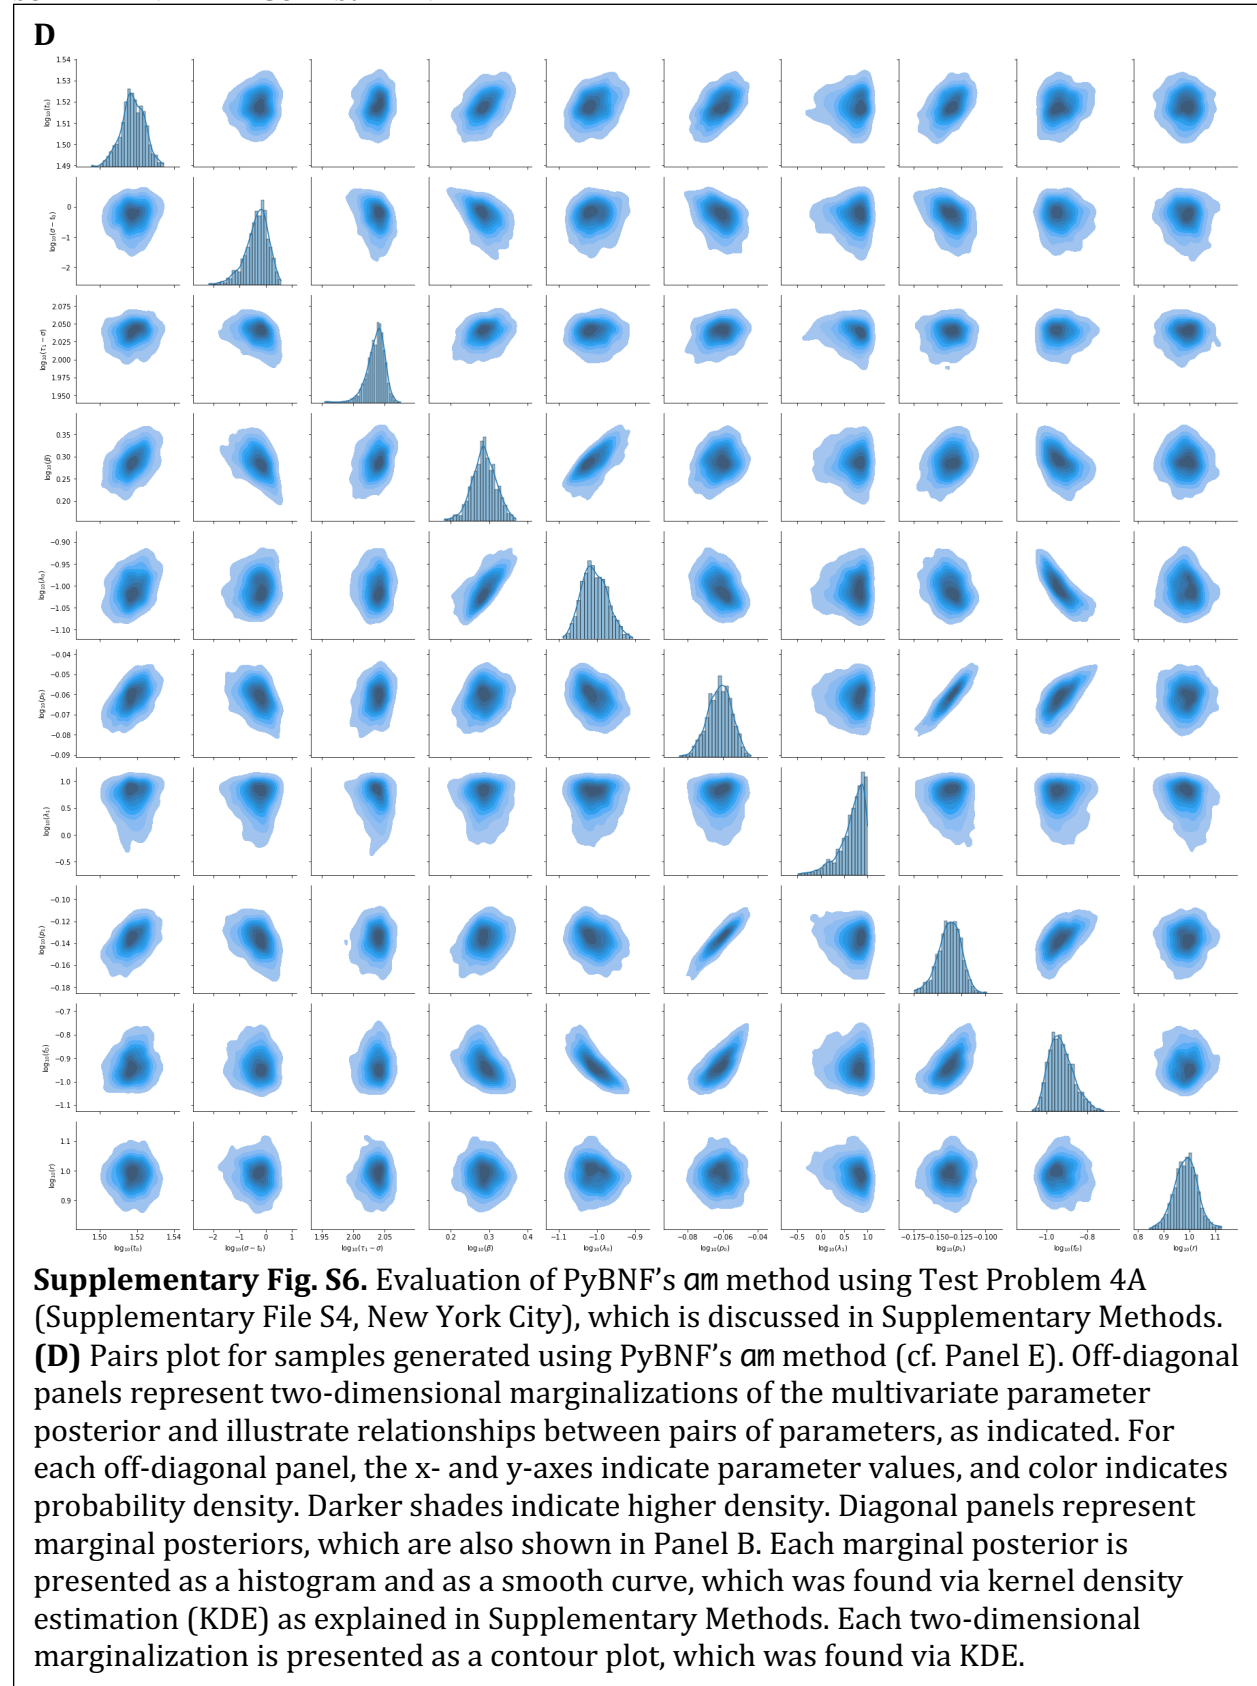

## SUPPLEMENTARY FIGURE S6 – PANEL E

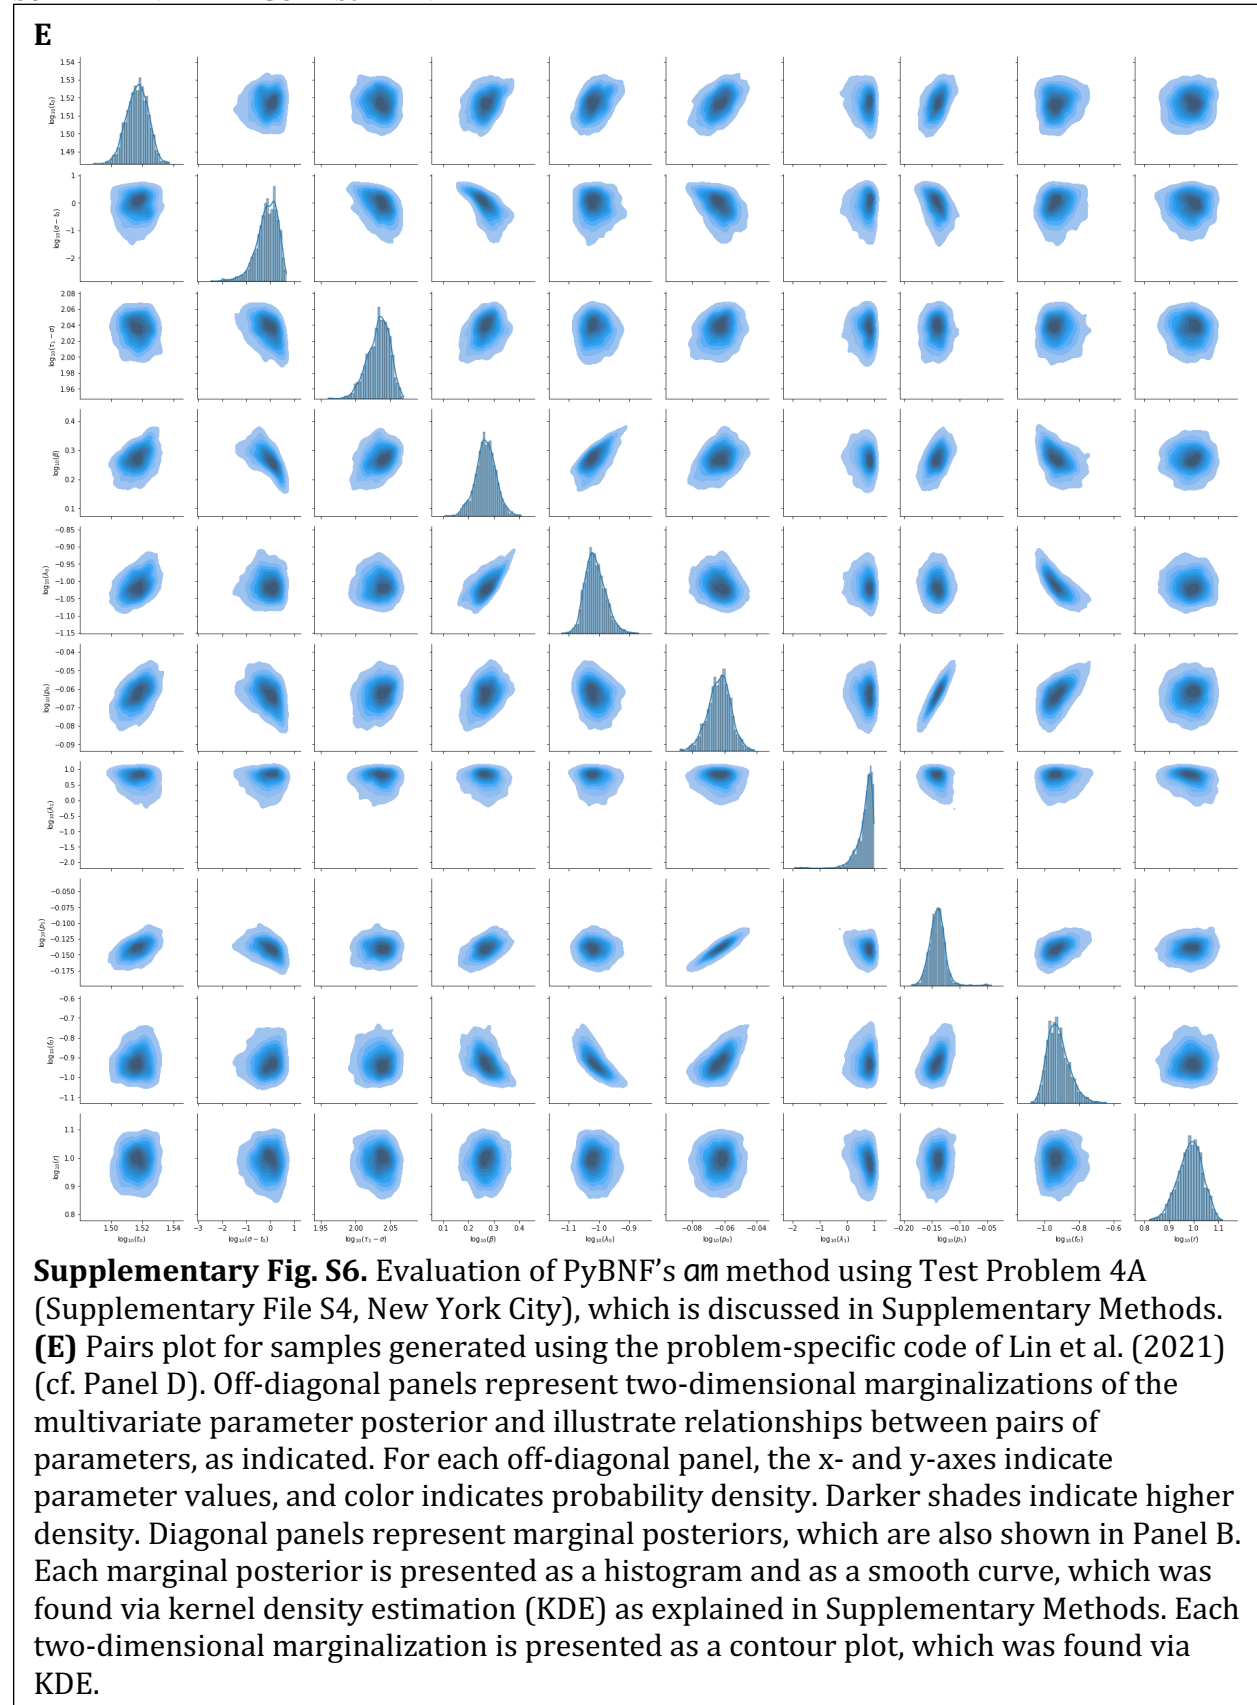

## SUPPLEMENTARY FIGURE S7 – PANEL A

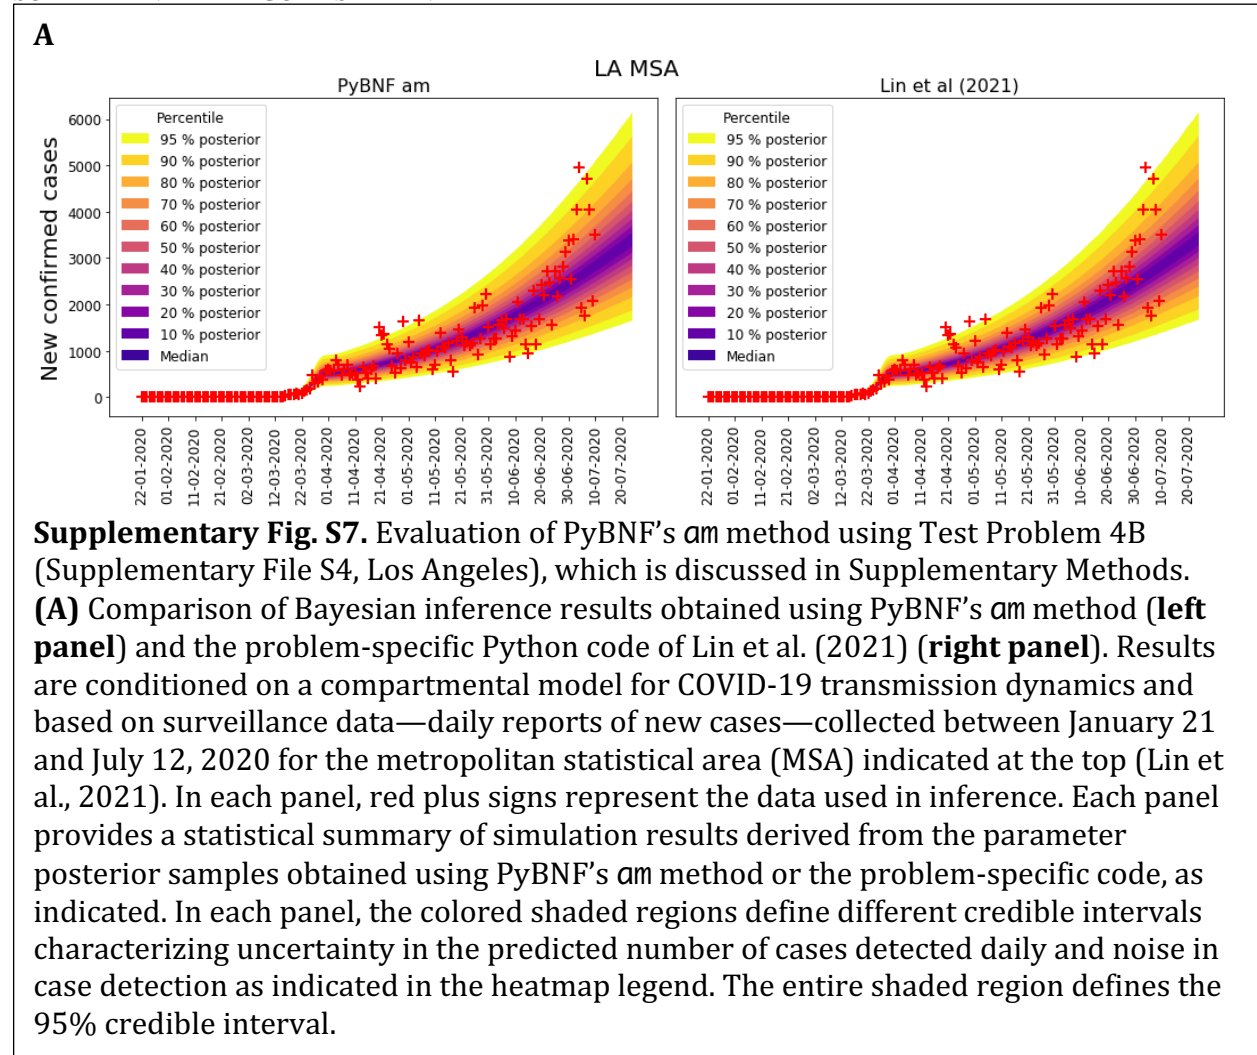

## SUPPLEMENTARY FIGURE S7 – PANEL B

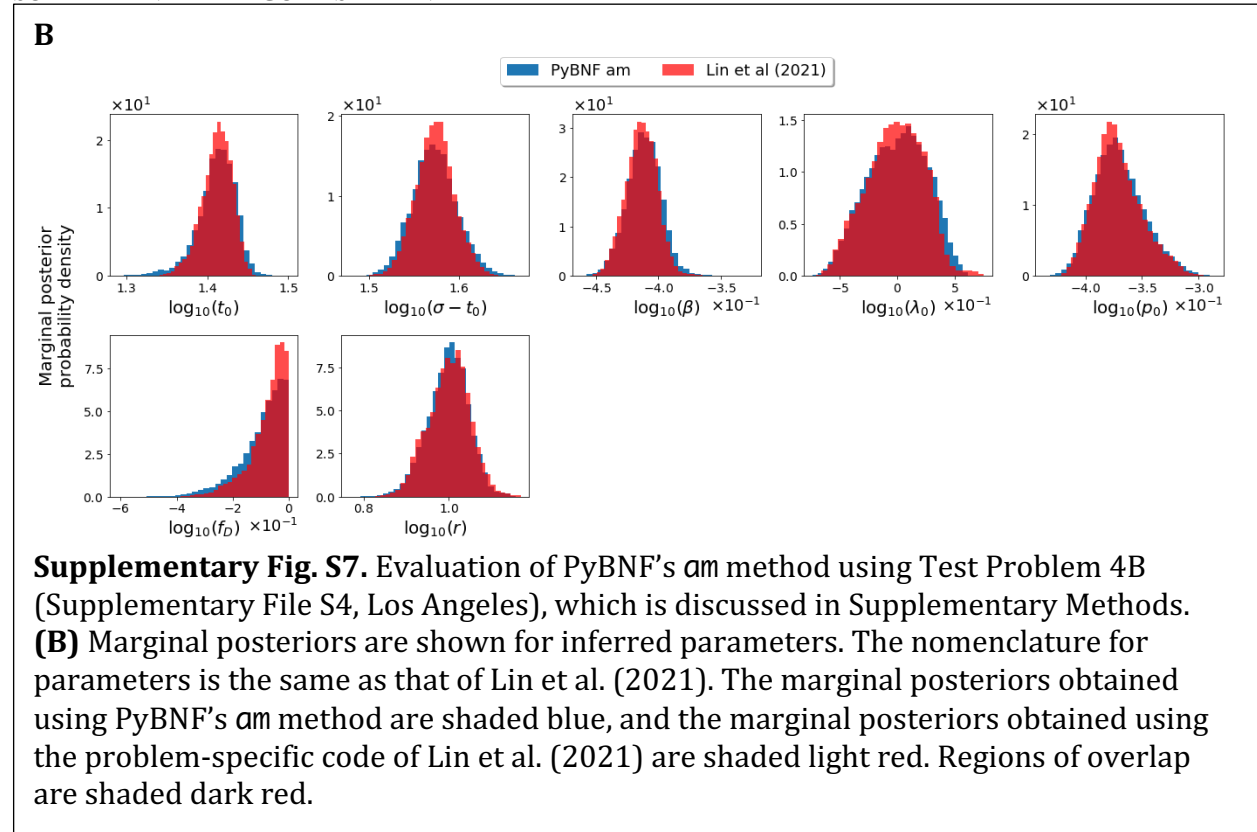

## SUPPLEMENTARY FIGURE S7 – PANEL C

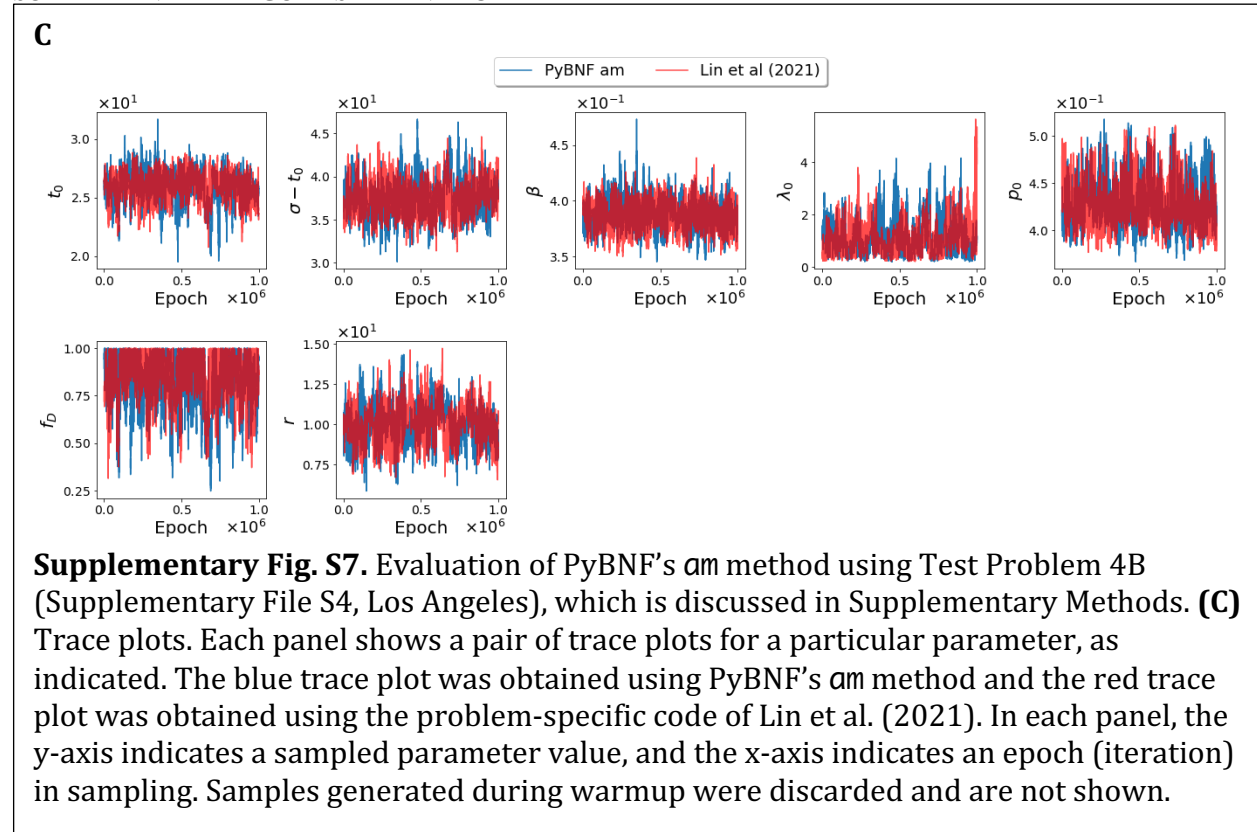

## SUPPLEMENTARY FIGURE S7 – PANEL D

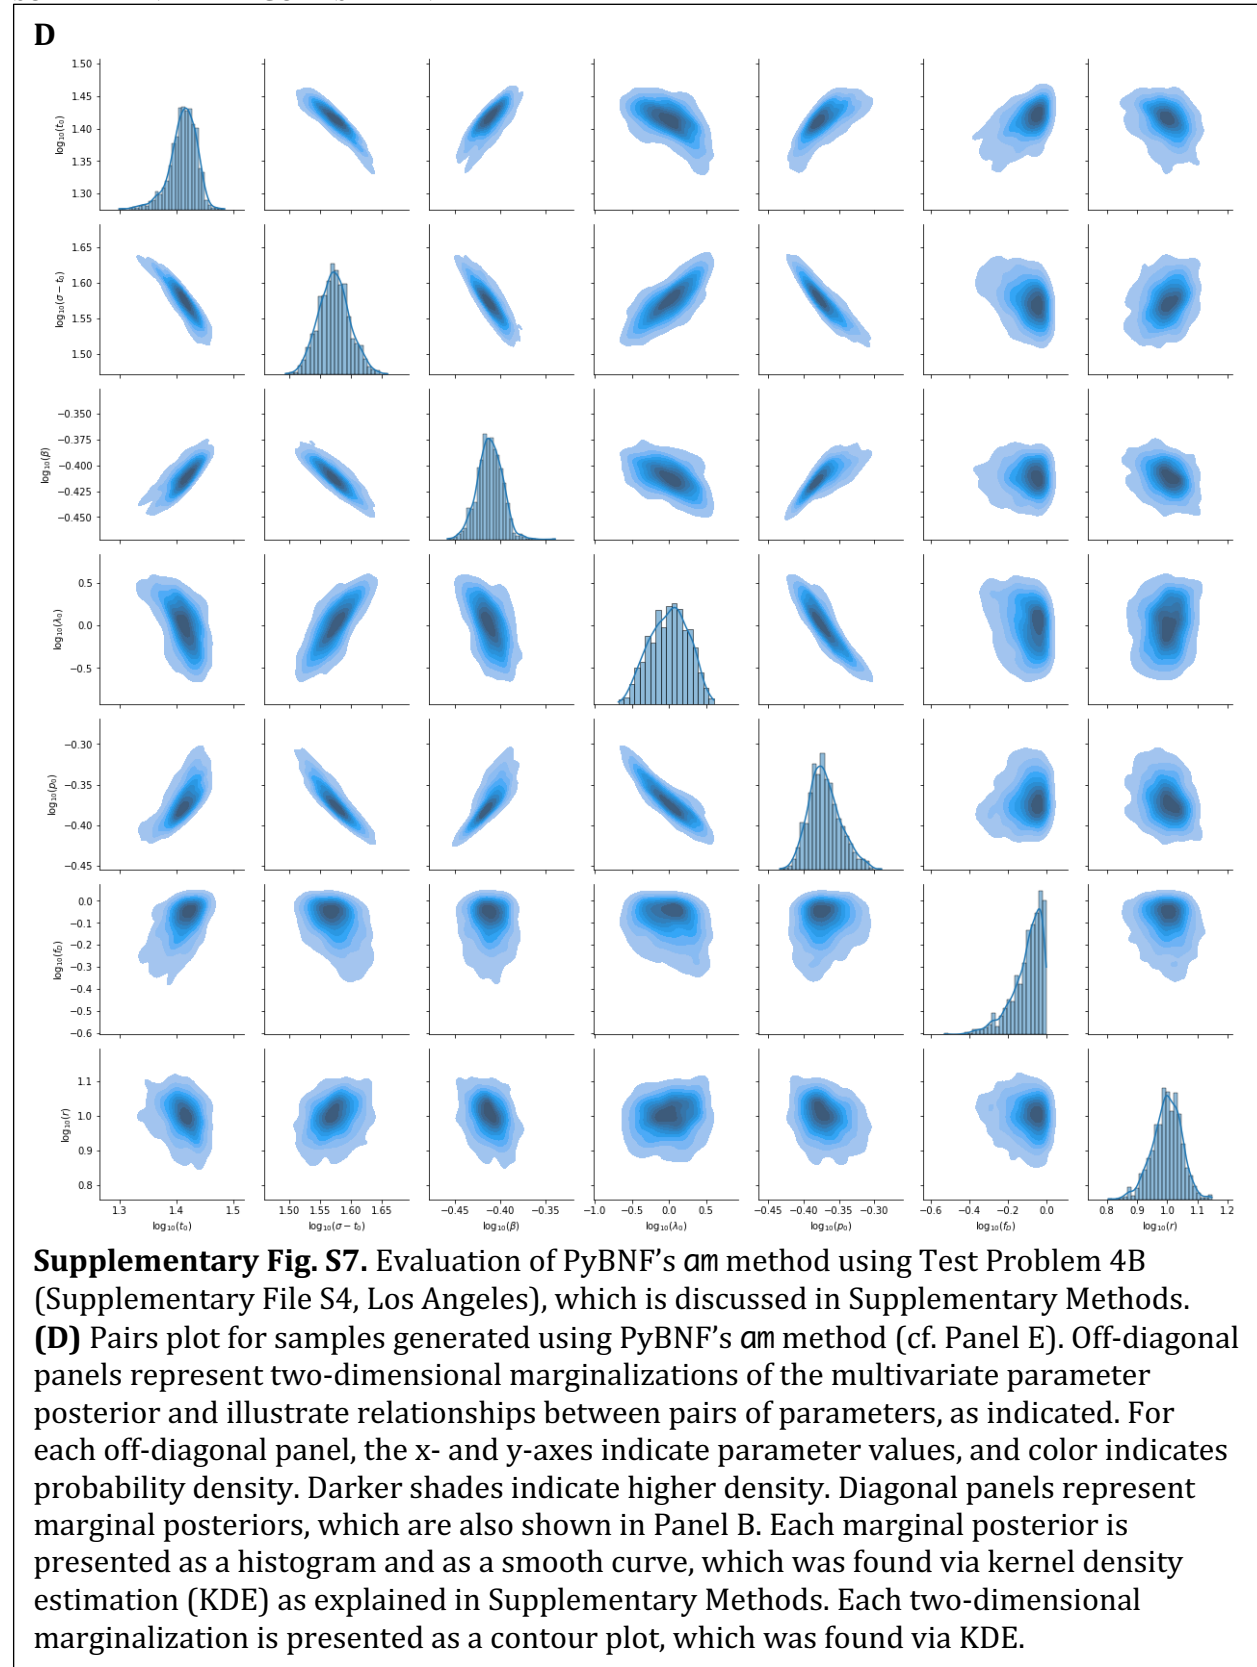

## SUPPLEMENTARY FIGURE S7 – PANEL E

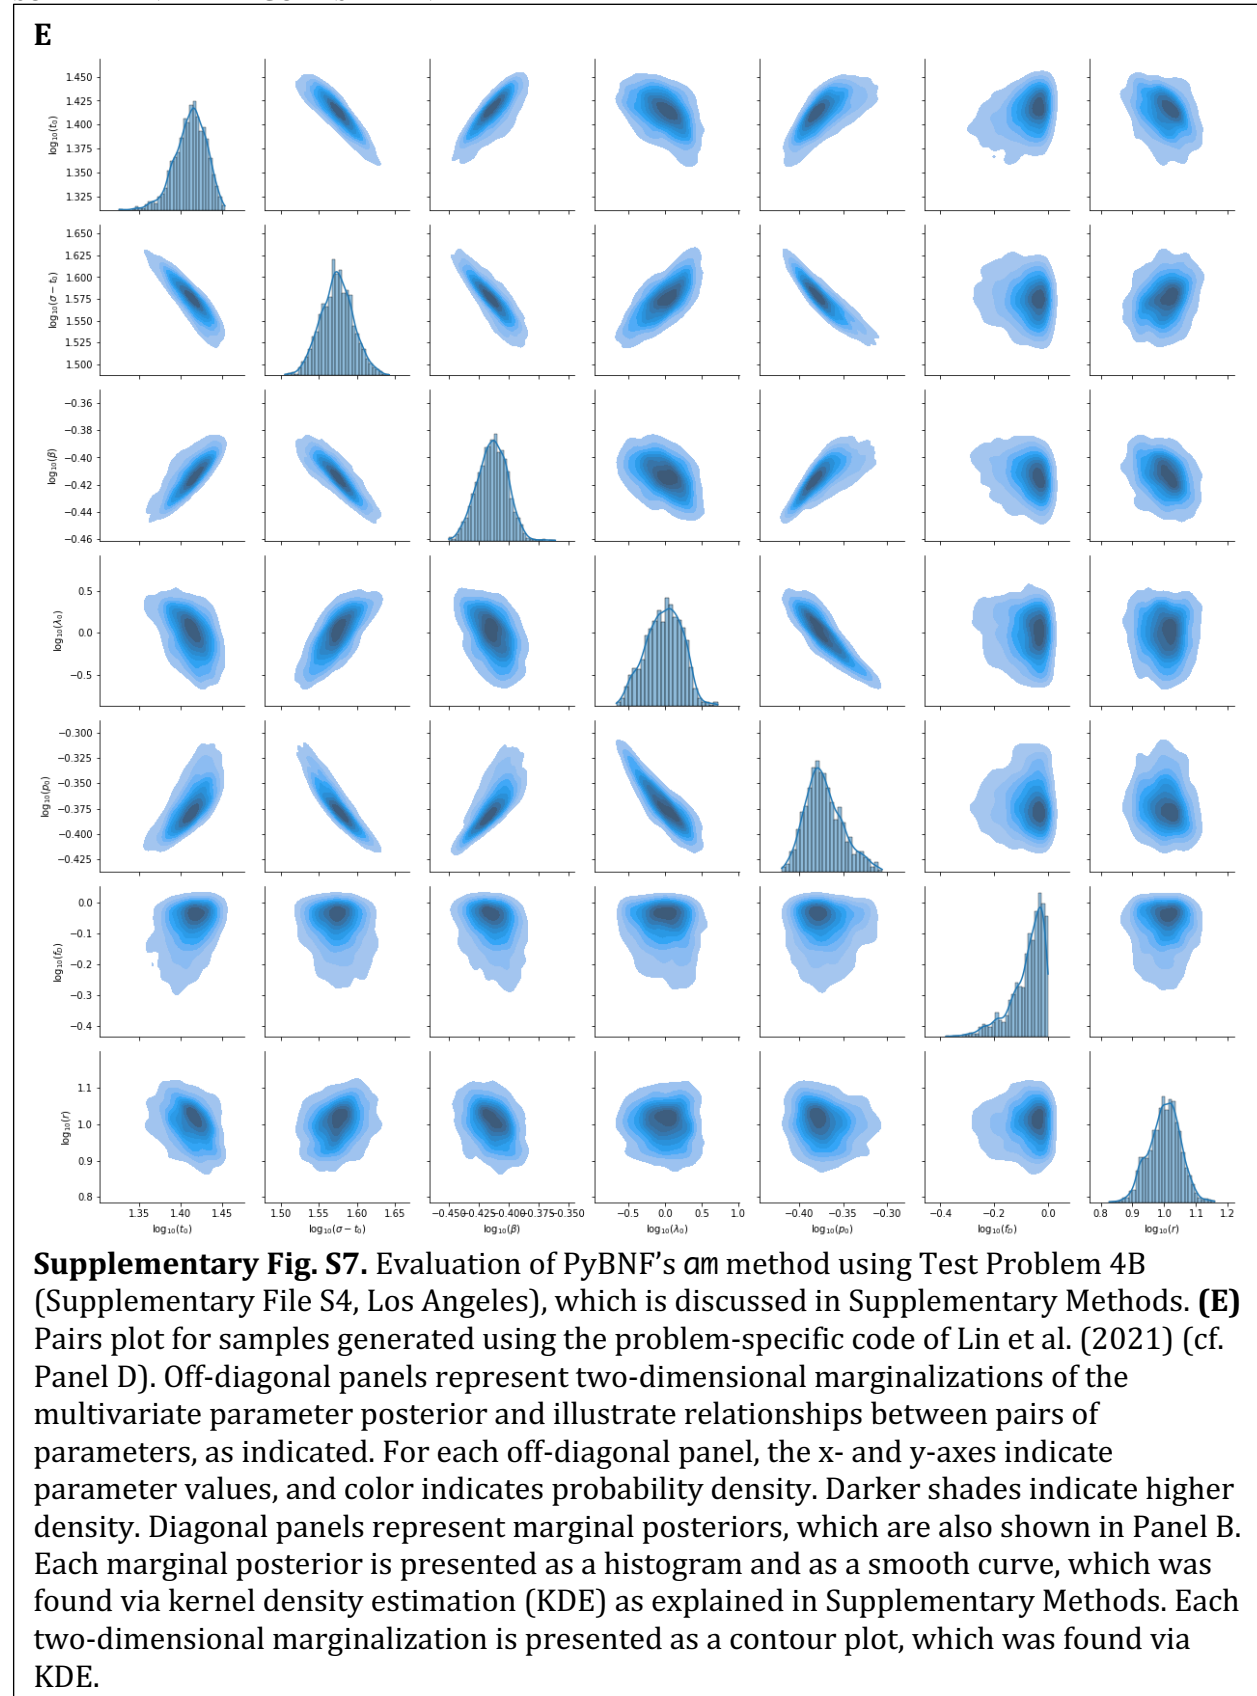

## SUPPLEMENTARY FIGURE S8 – PANEL A

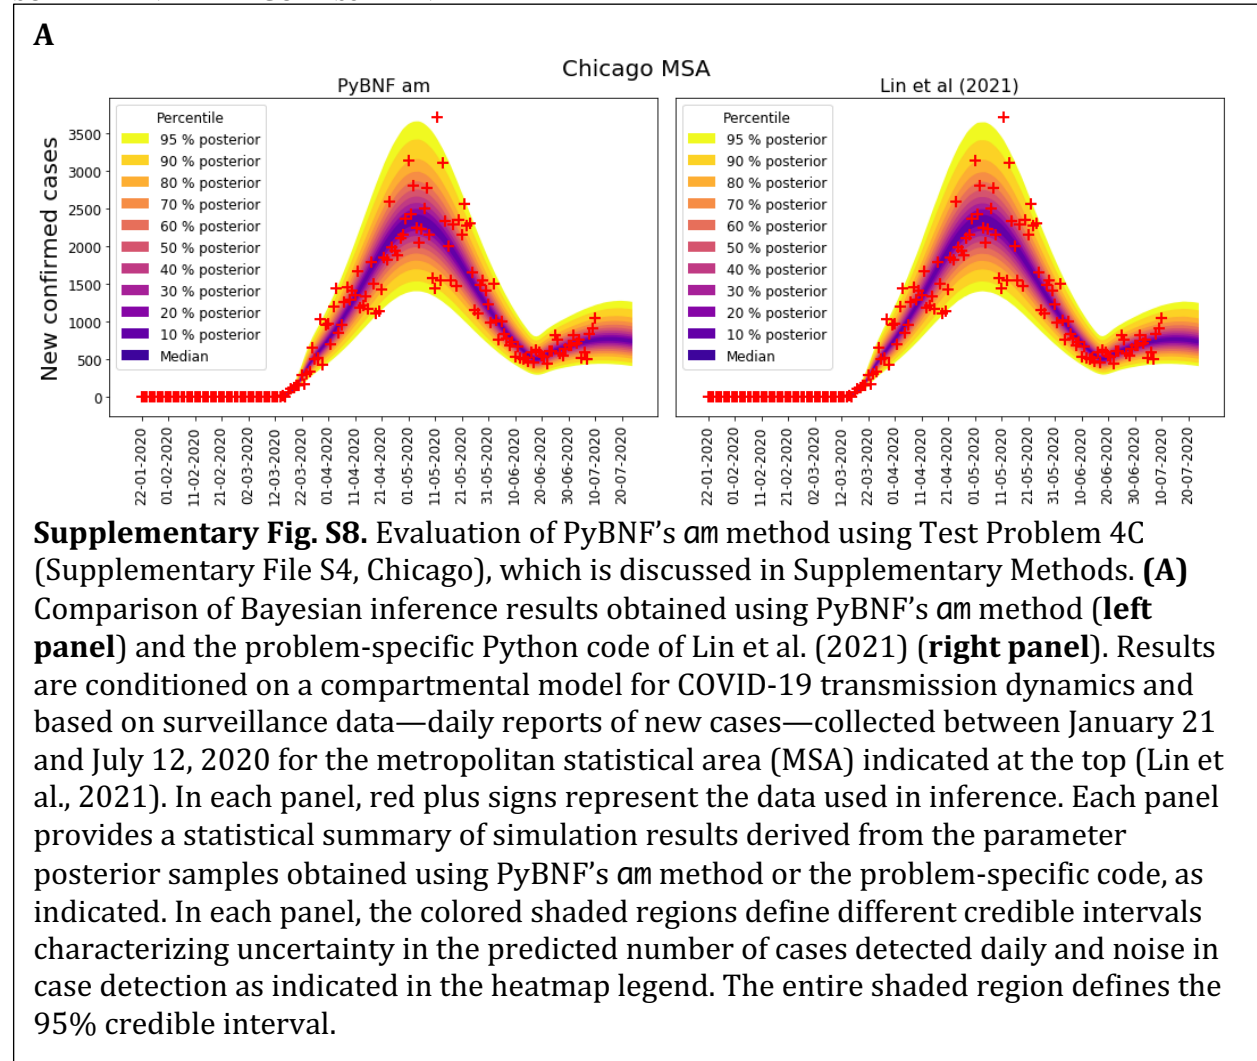



## SUPPLEMENTARY FIGURE S8 – PANEL B

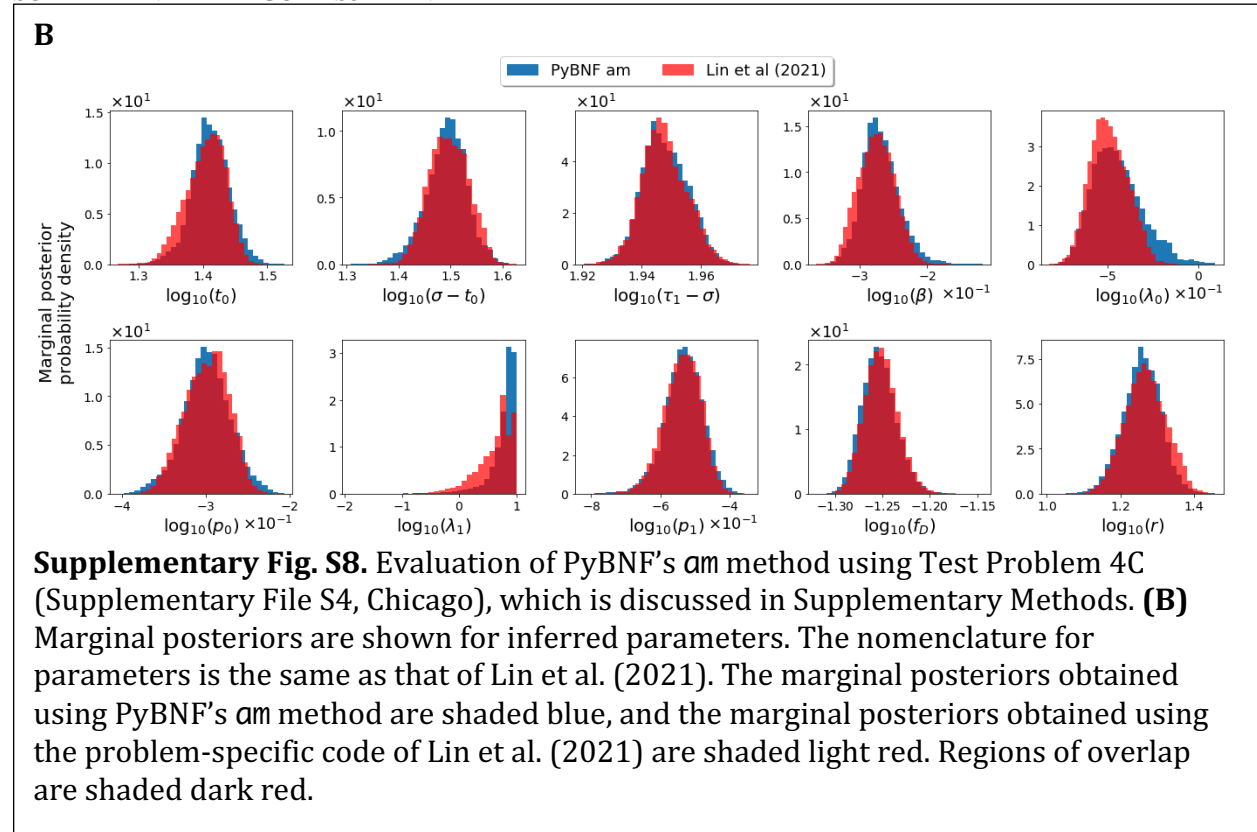

## SUPPLEMENTARY FIGURE S8 – PANEL C

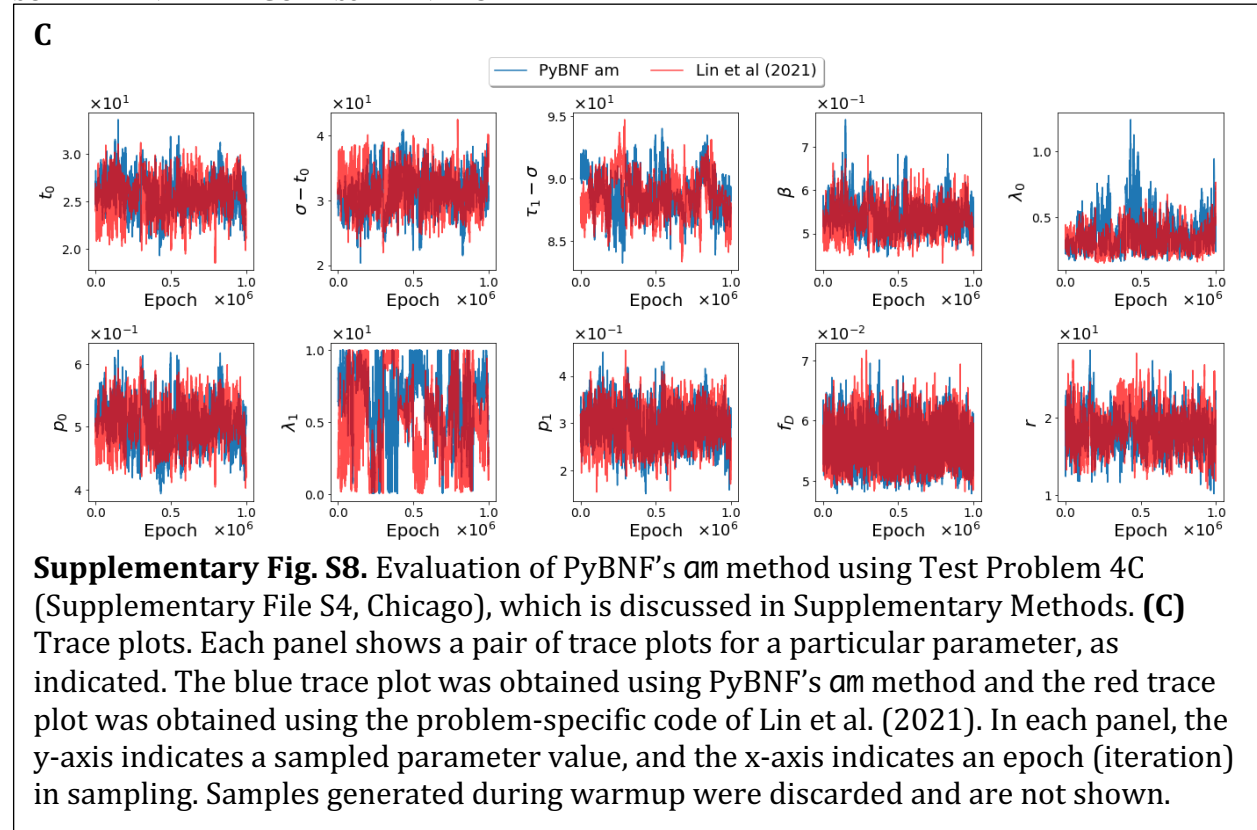

**SUPPLEMENTARY FIGURE S8 – PANEL D**

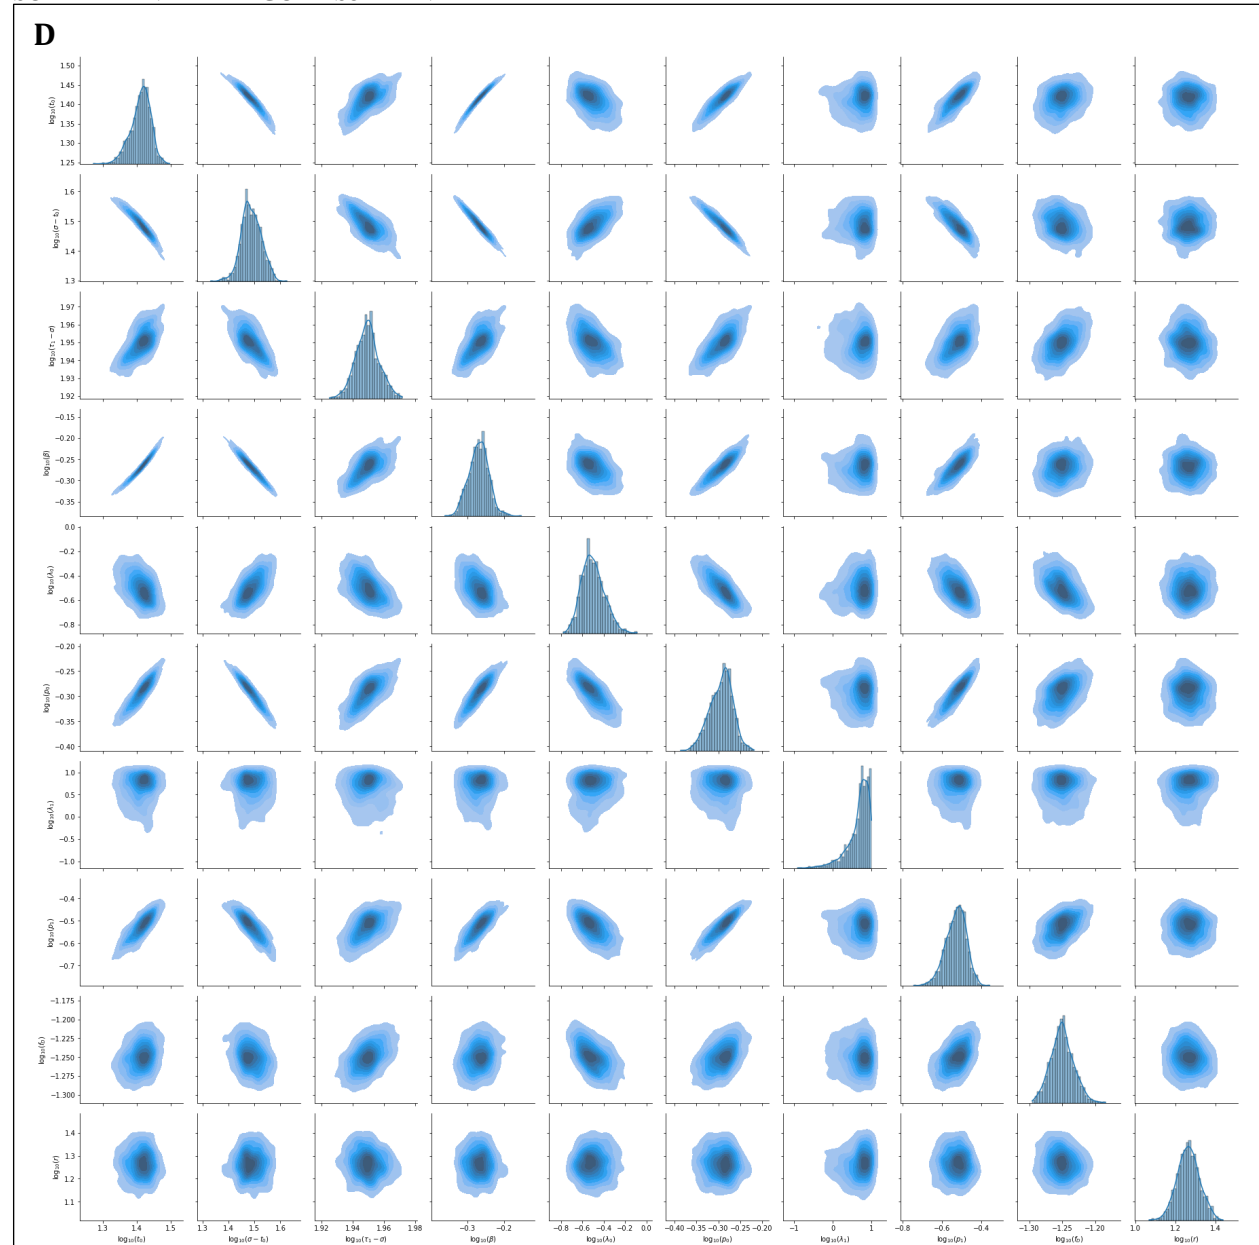

**Supplementary Fig. S8.** Evaluation of PyBNF’s *am* method using Test Problem 4C (Supplementary File S4, Chicago), which is discussed in Supplementary Methods. **(D)** Pairs plot for samples generated using PyBNF’s *am* method (cf. Panel E). Off-diagonal panels represent two-dimensional marginalizations of the multivariate parameter posterior and illustrate relationships between pairs of parameters, as indicated. For each off-diagonal panel, the x- and y-axes indicate parameter values, and color indicates probability density. Darker shades indicate higher density. Diagonal panels represent marginal posteriors, which are also shown in Panel B. Each marginal posterior is presented as a histogram and as a smooth curve, which was found via kernel density estimation (KDE) as explained in Supplementary Methods. Each two-dimensional marginalization is presented as a contour plot, which was found via KDE.

## SUPPLEMENTARY FIGURE S8 – PANEL E

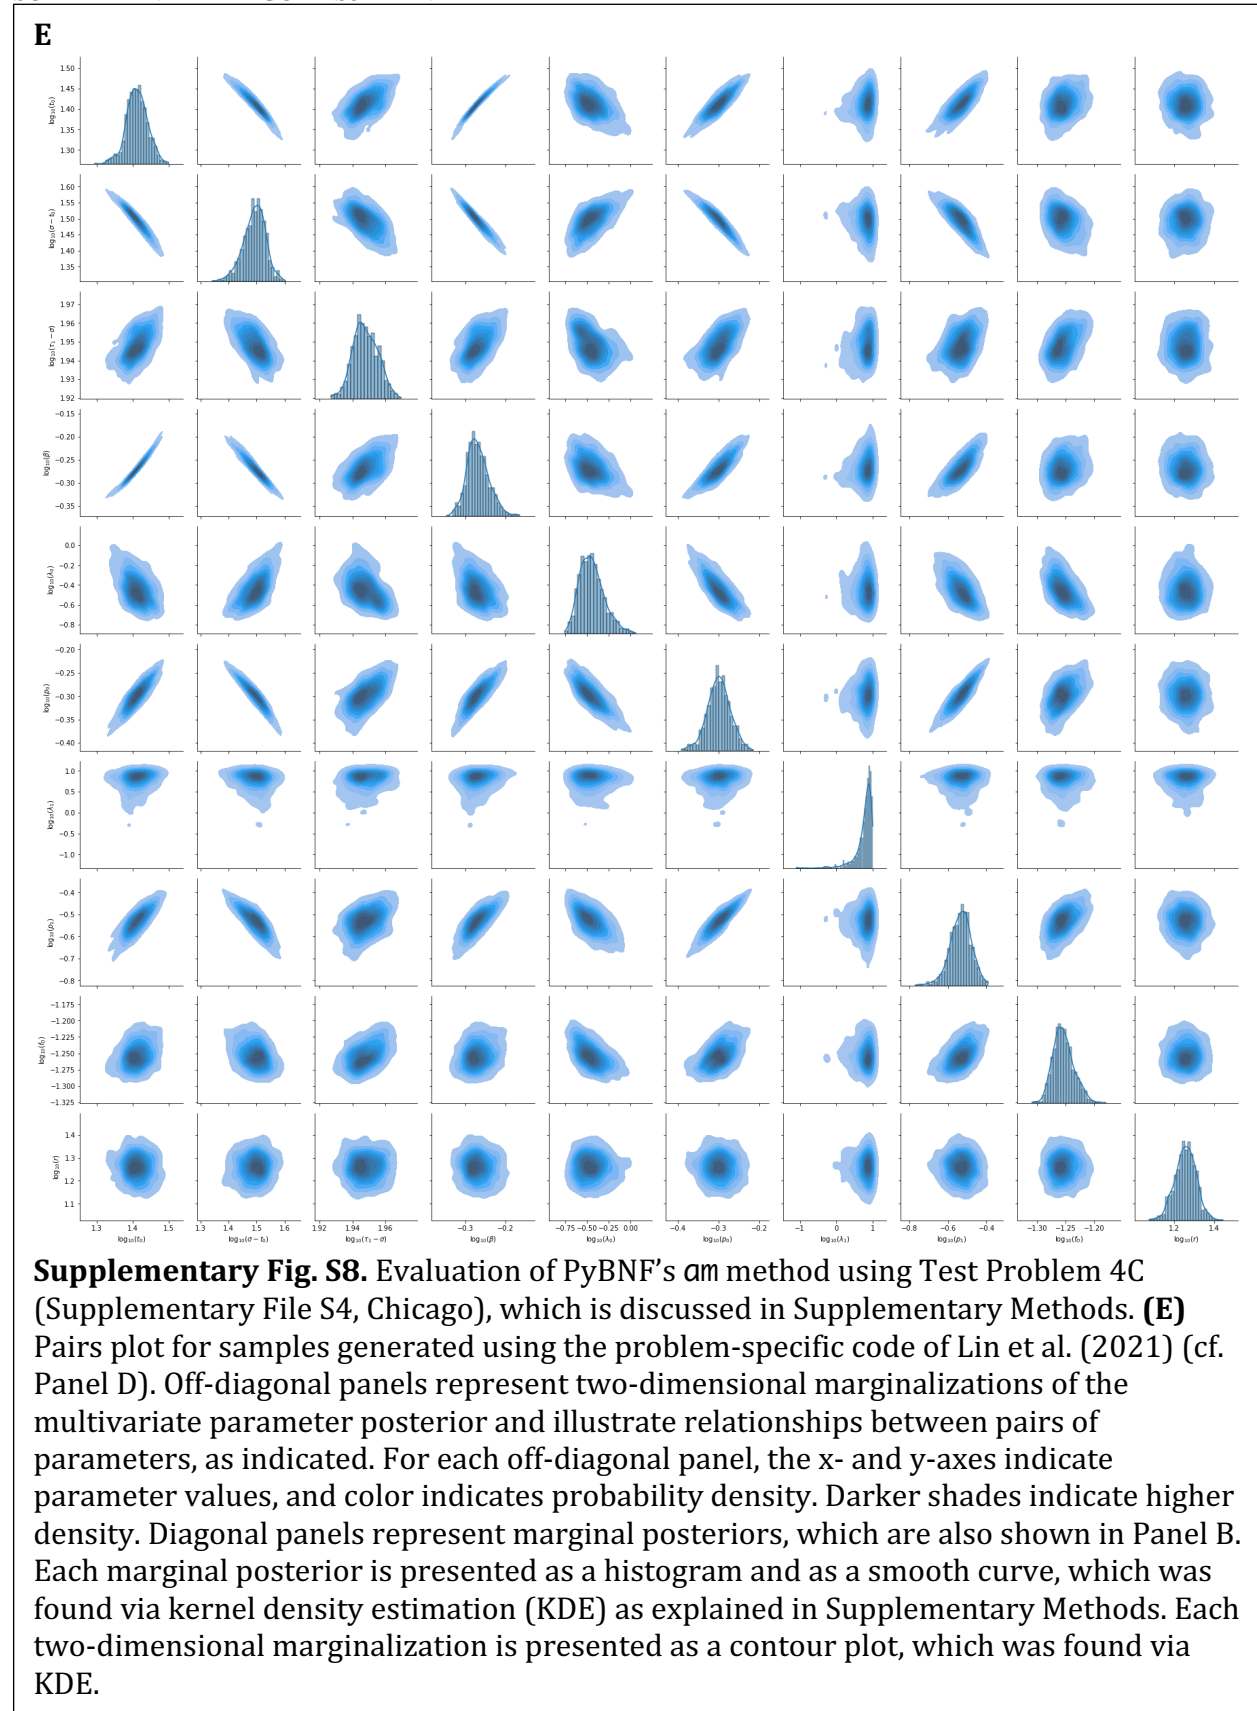

## SUPPLEMENTARY FIGURE S9 – PANEL A

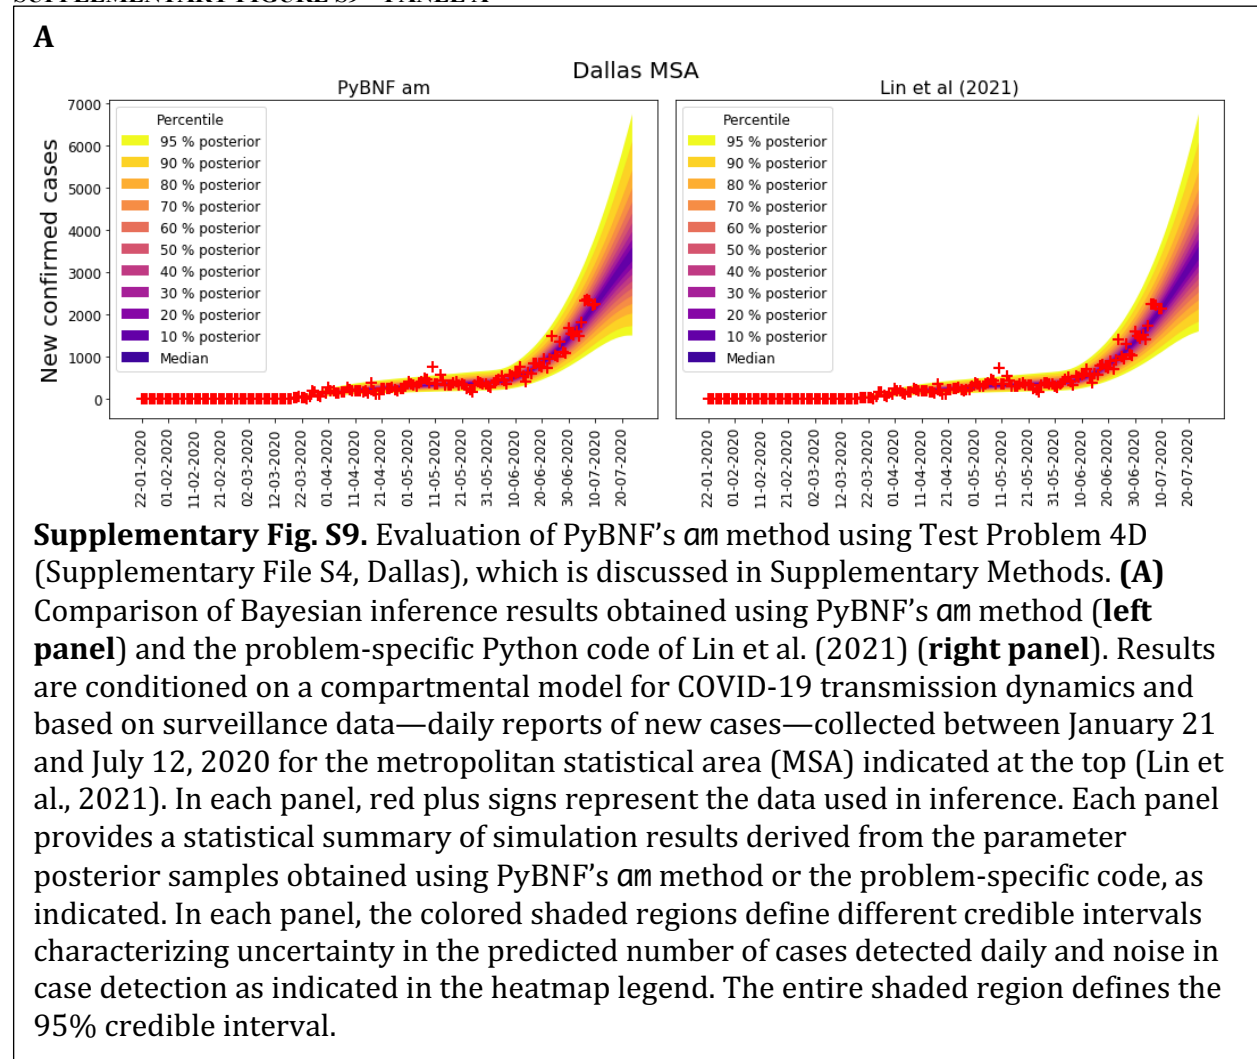

## SUPPLEMENTARY FIGURE S9 – PANEL B

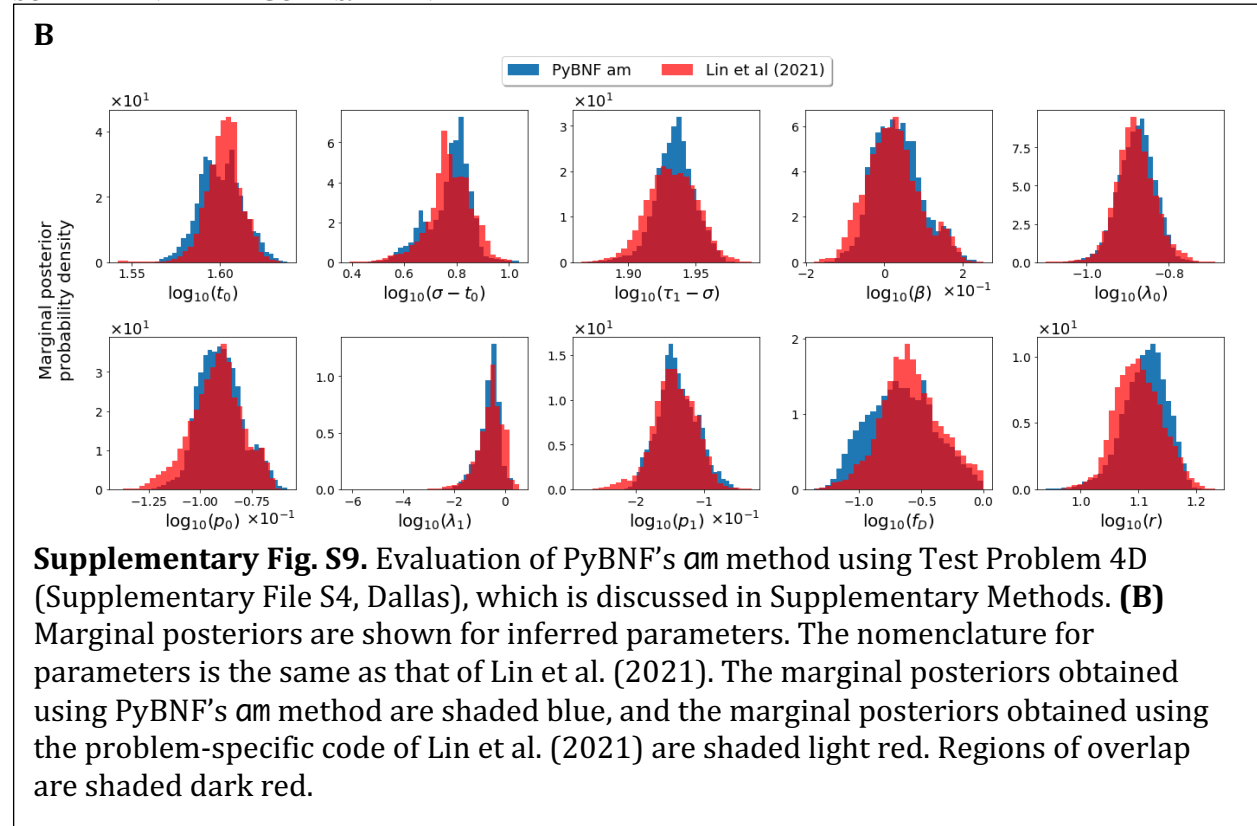

## SUPPLEMENTARY FIGURE S9 – PANEL C

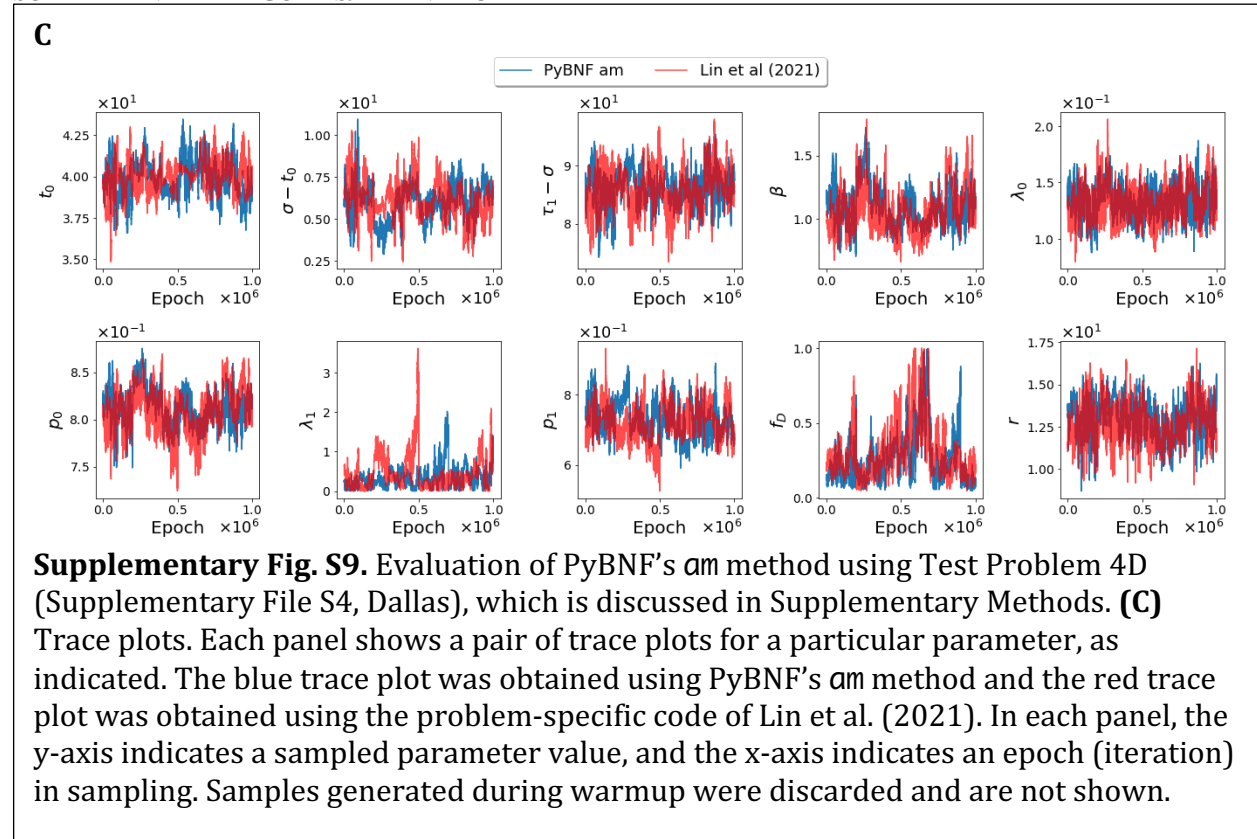

## SUPPLEMENTARY FIGURE S9 – PANEL D

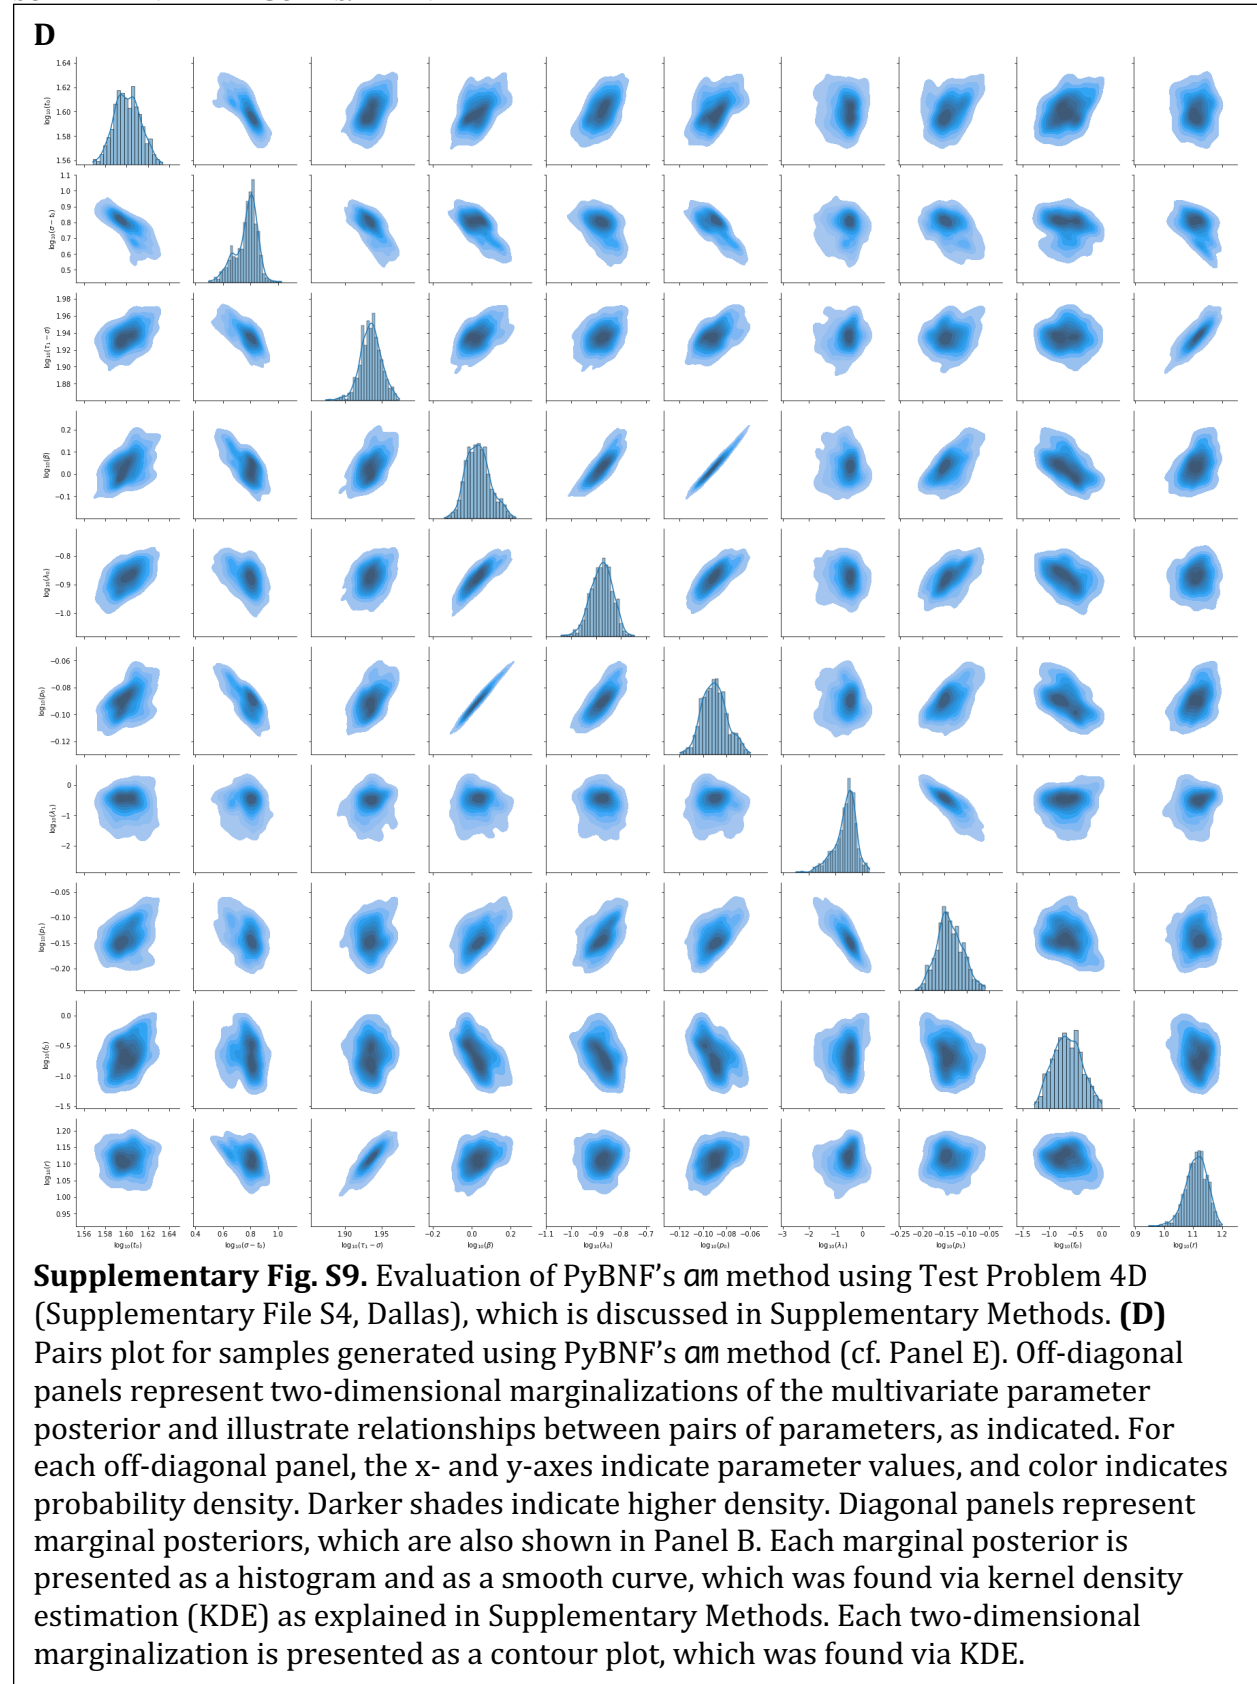



## SUPPLEMENTARY FIGURE S9 – PANEL E

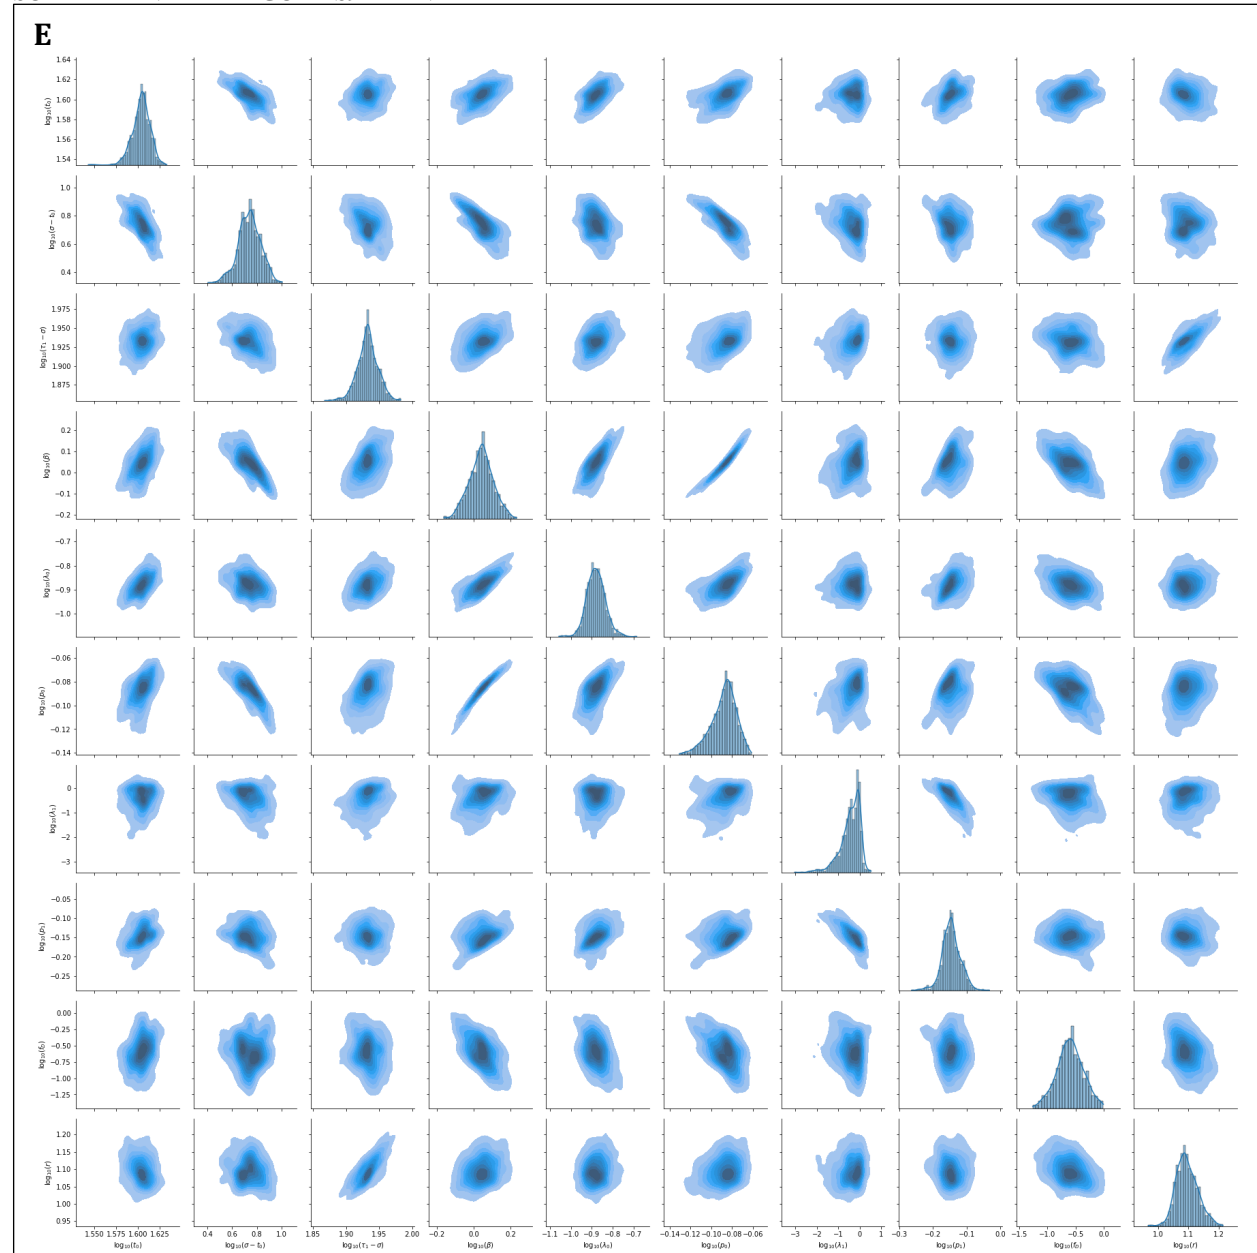

**Supplementary Fig. S9.** Evaluation of PyBNF’s *am* method using Test Problem 4D (Supplementary File S4, Dallas), which is discussed in Supplementary Methods. **(E)** Pairs plot for samples generated using the problem-specific code of Lin et al. (2021) (cf. Panel D). Off-diagonal panels represent two-dimensional marginalizations of the multivariate parameter posterior and illustrate relationships between pairs of parameters, as indicated. For each off-diagonal panel, the x- and y-axes indicate parameter values, and color indicates probability density. Darker shades indicate higher density. Diagonal panels represent marginal posteriors, which are also shown in Panel B. Each marginal posterior is presented as a histogram and as a smooth curve, which was found via kernel density estimation (KDE) as explained in Supplementary Methods. Each two-dimensional marginalization is presented as a contour plot, which was found via KDE.

## SUPPLEMENTARY FIGURE S10 – PANEL A

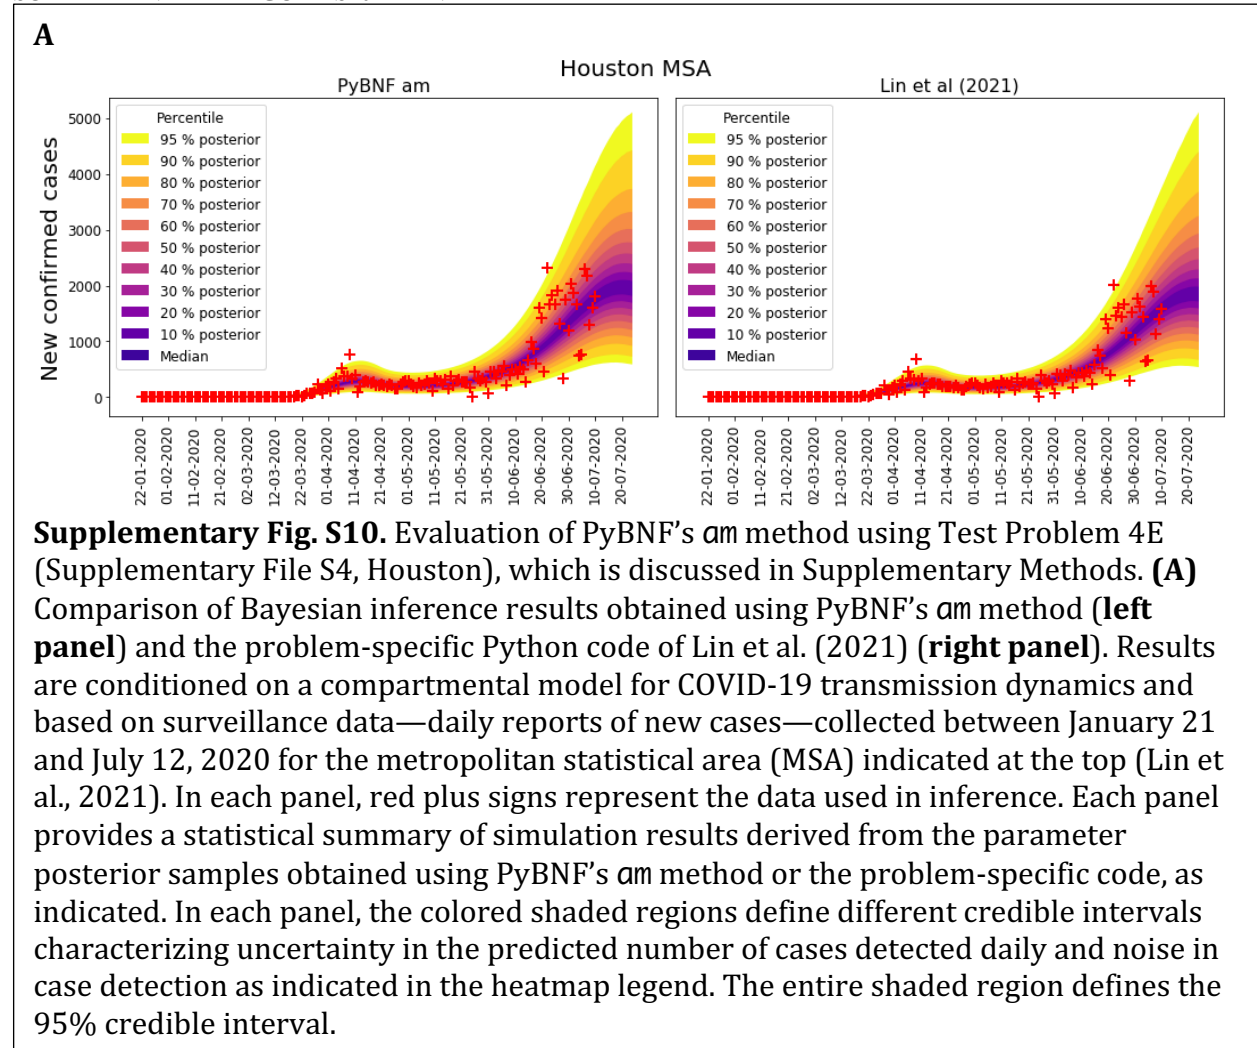

## SUPPLEMENTARY FIGURE S10 – PANEL B

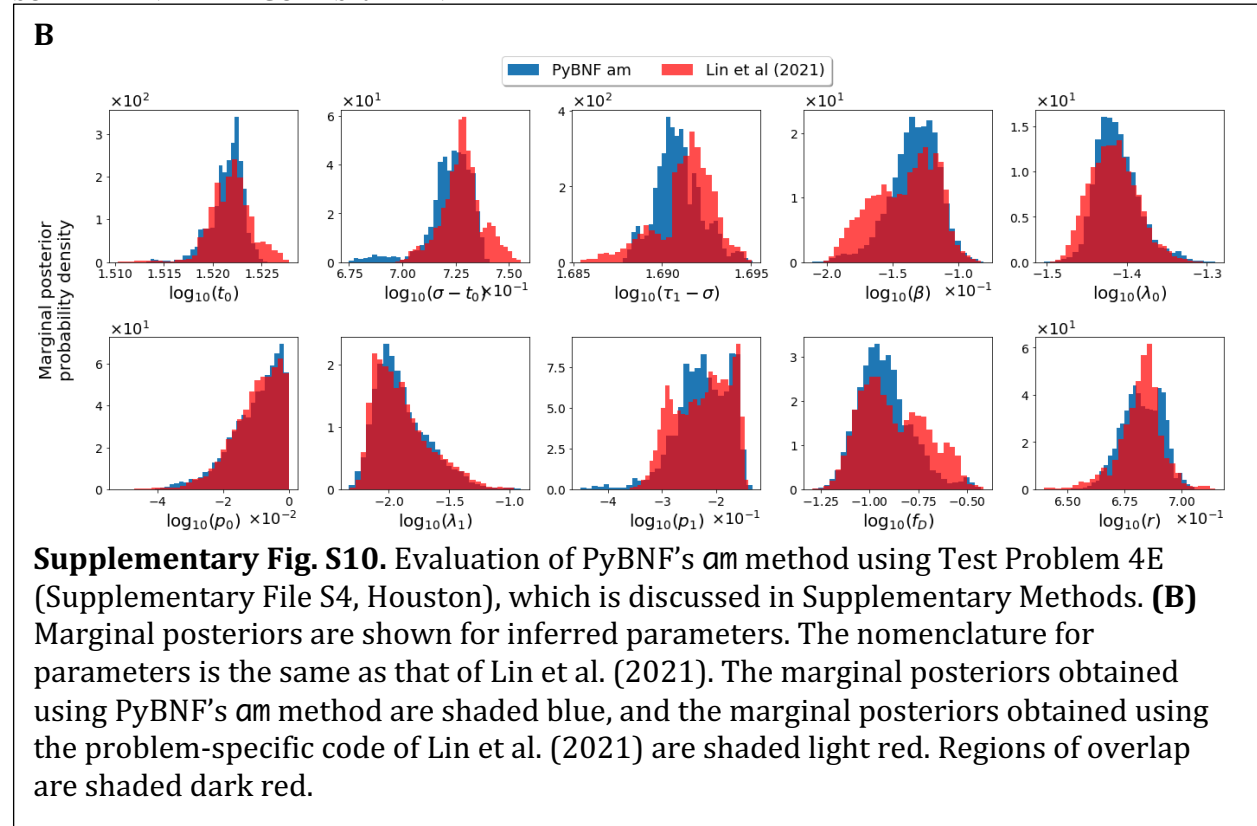

## SUPPLEMENTARY FIGURE S10 – PANEL C

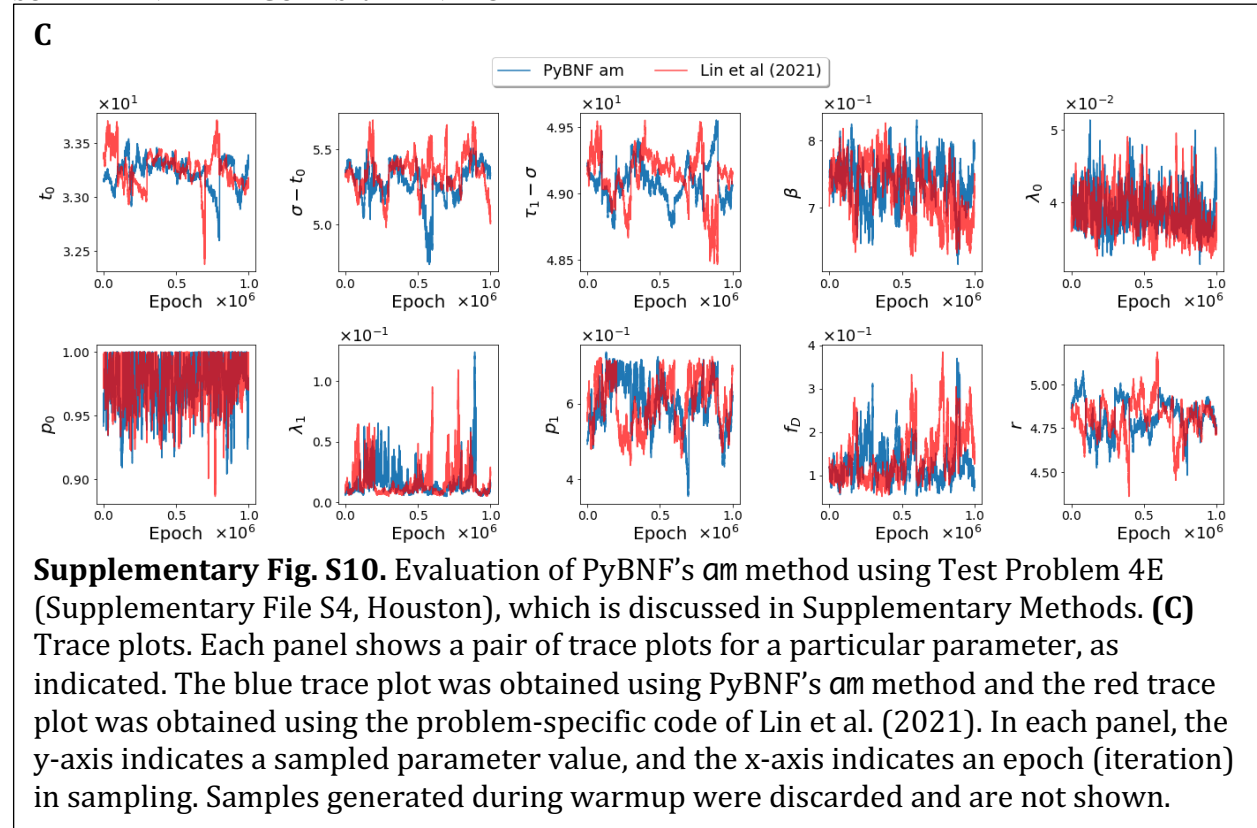

## SUPPLEMENTARY FIGURE S10 – PANEL D

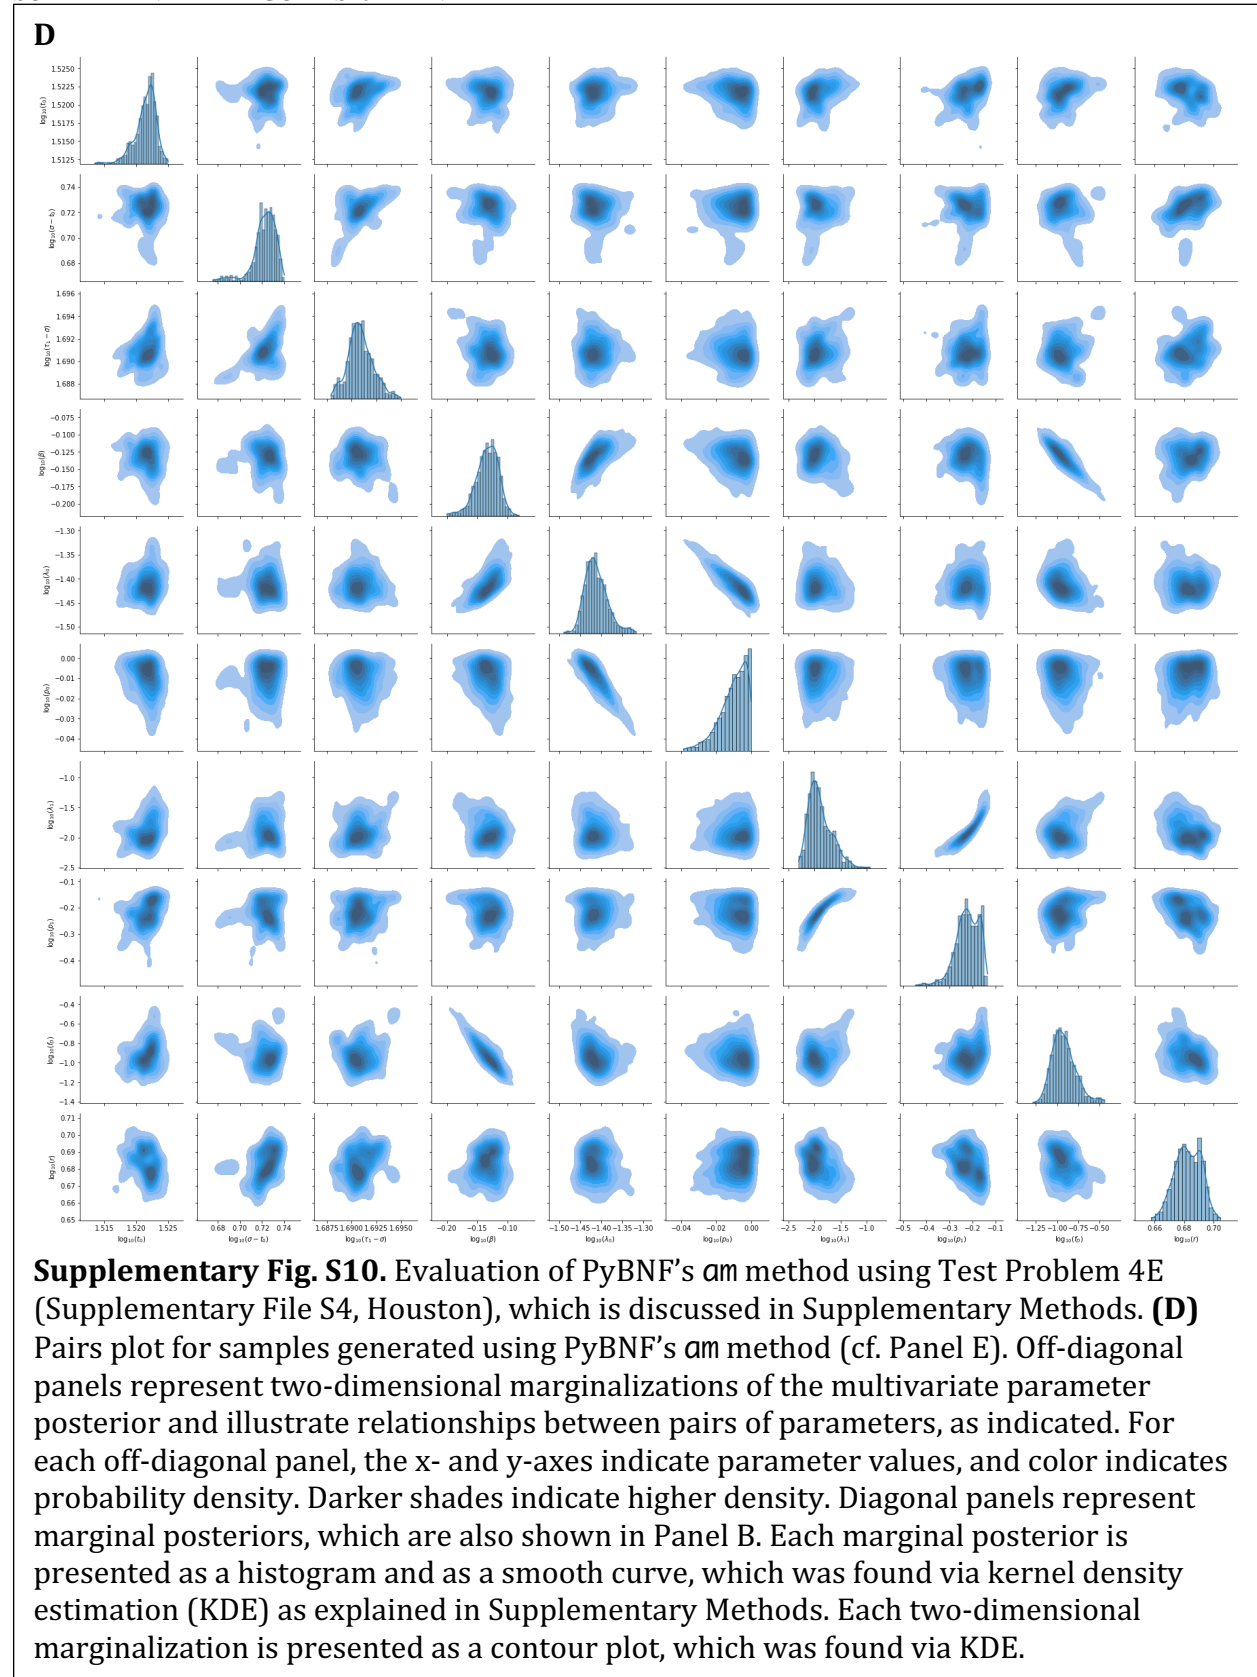

## SUPPLEMENTARY FIGURE S10 – PANEL E

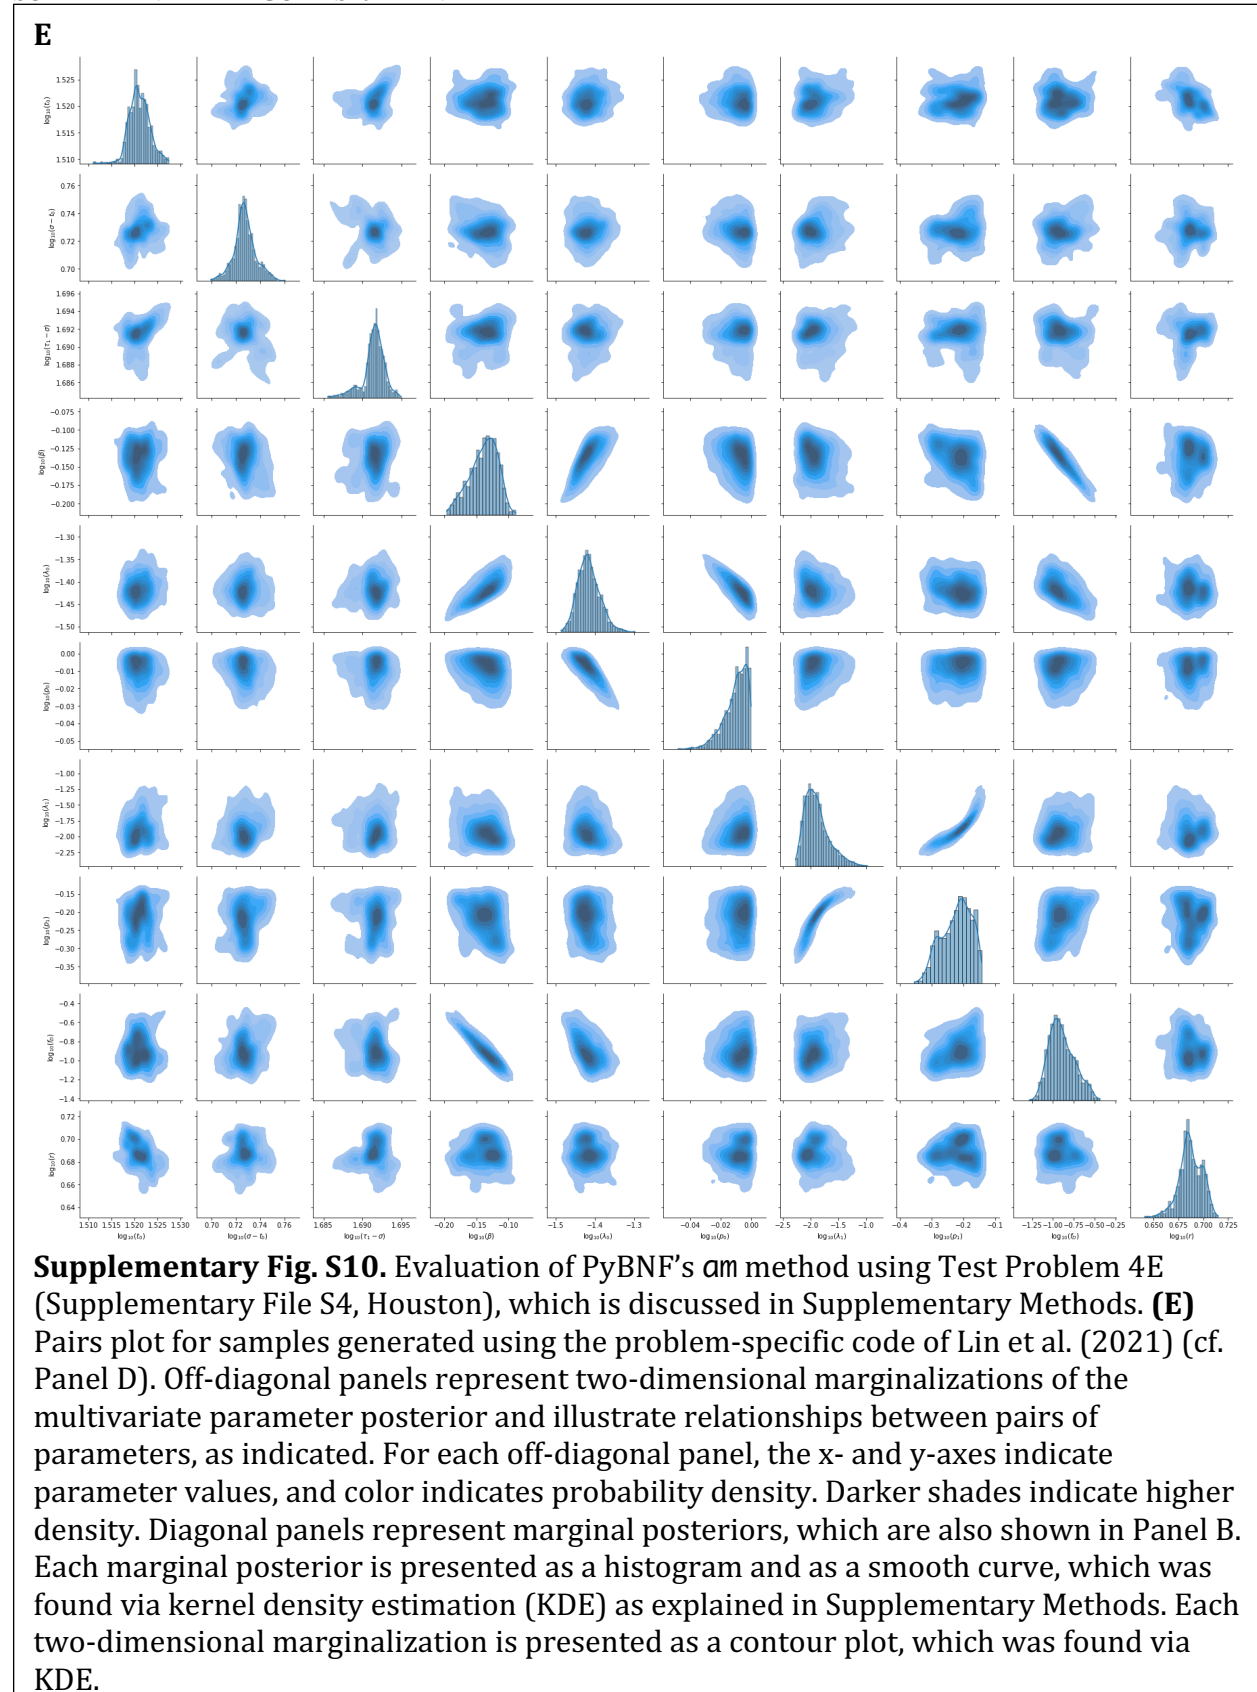

## SUPPLEMENTARY FIGURE S11 – PANEL A

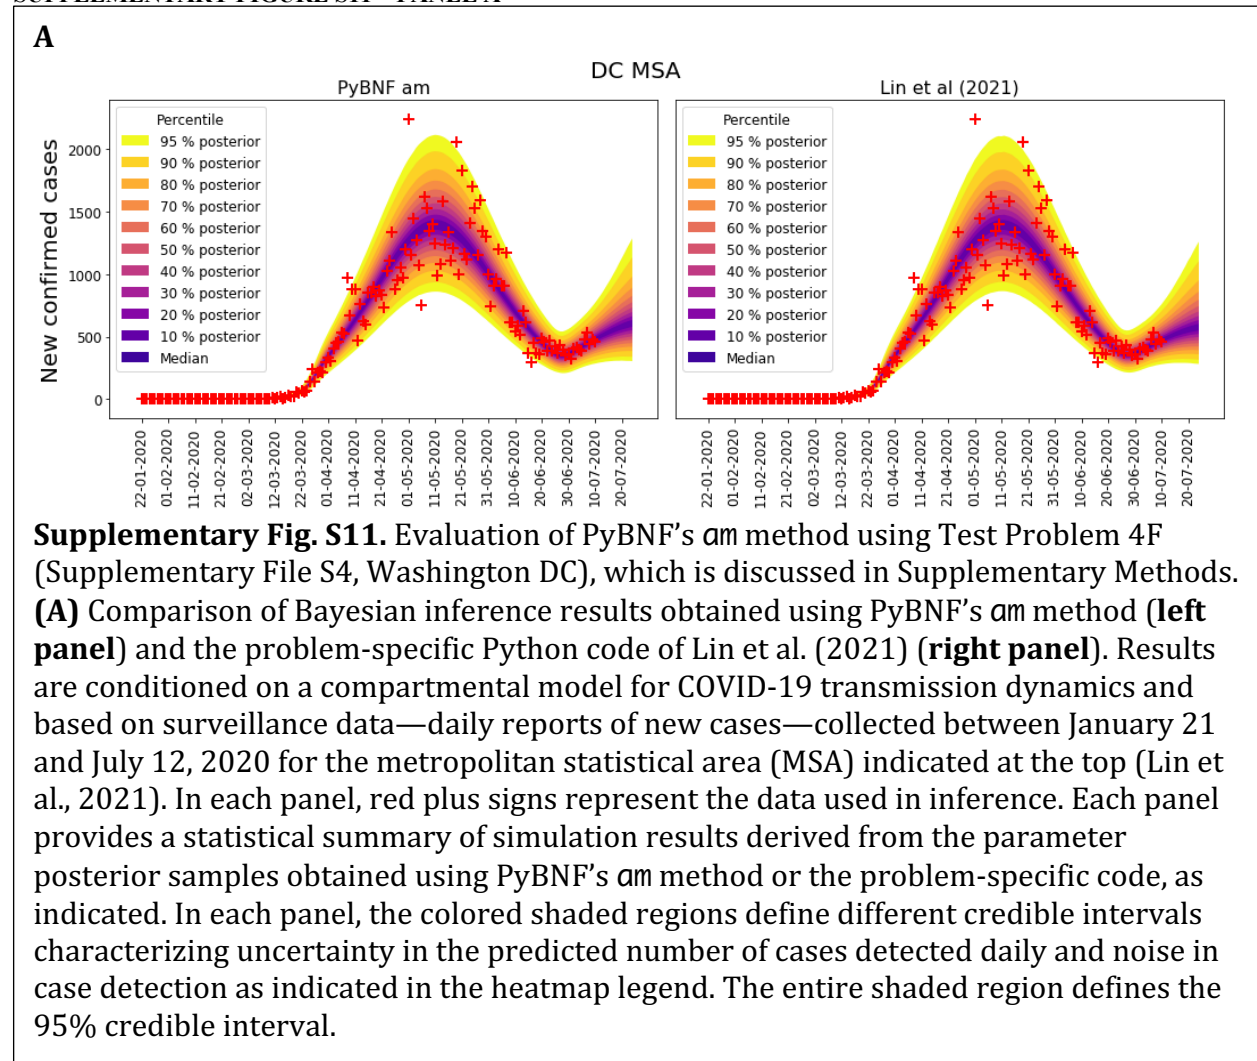

## SUPPLEMENTARY FIGURE S11 – PANEL B

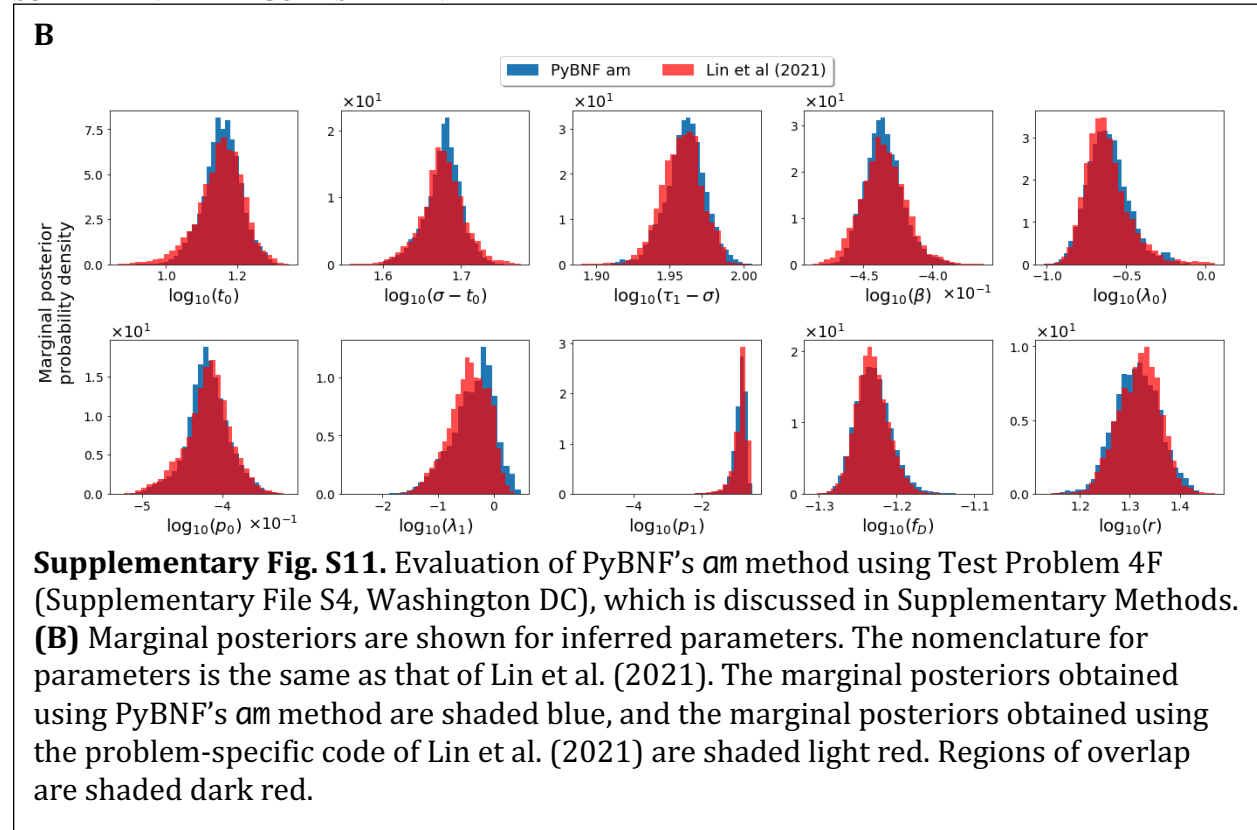



## SUPPLEMENTARY FIGURE S11 – PANEL C

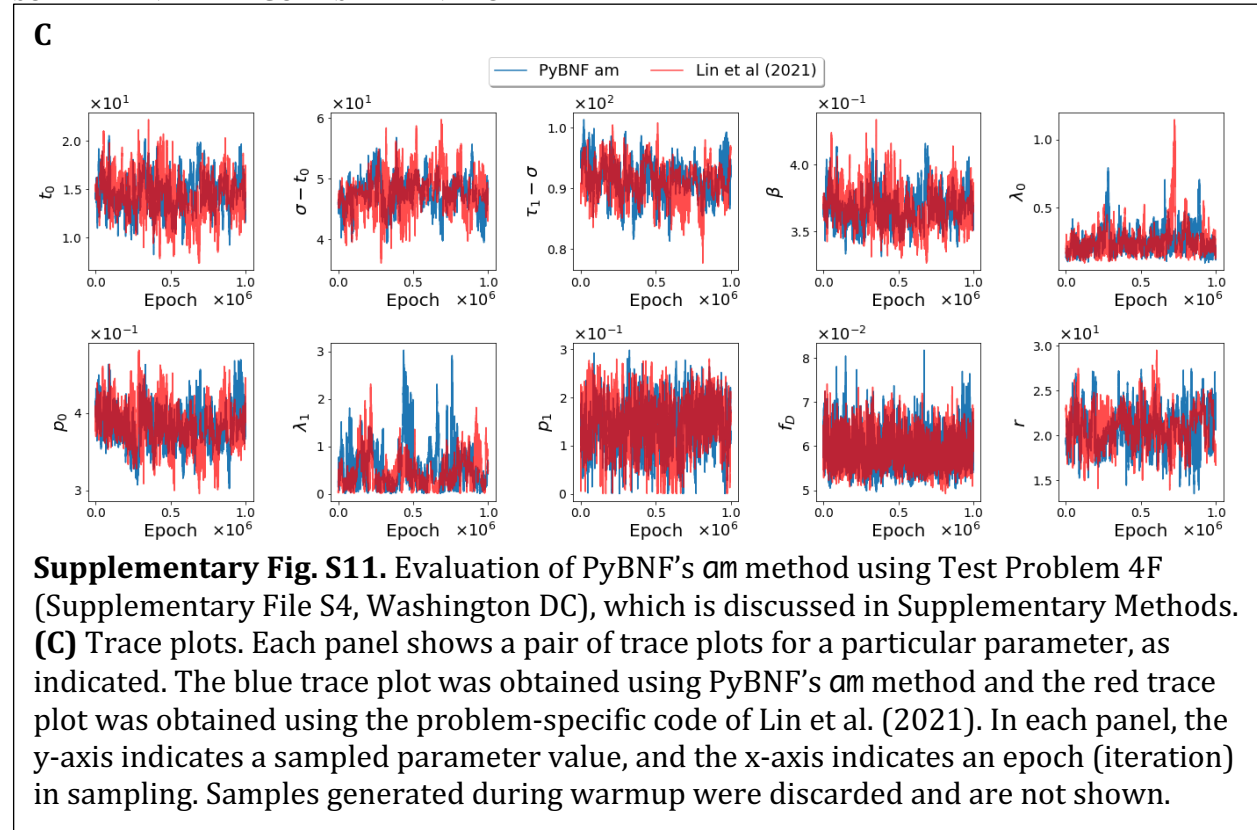

## SUPPLEMENTARY FIGURE S11 – PANEL D

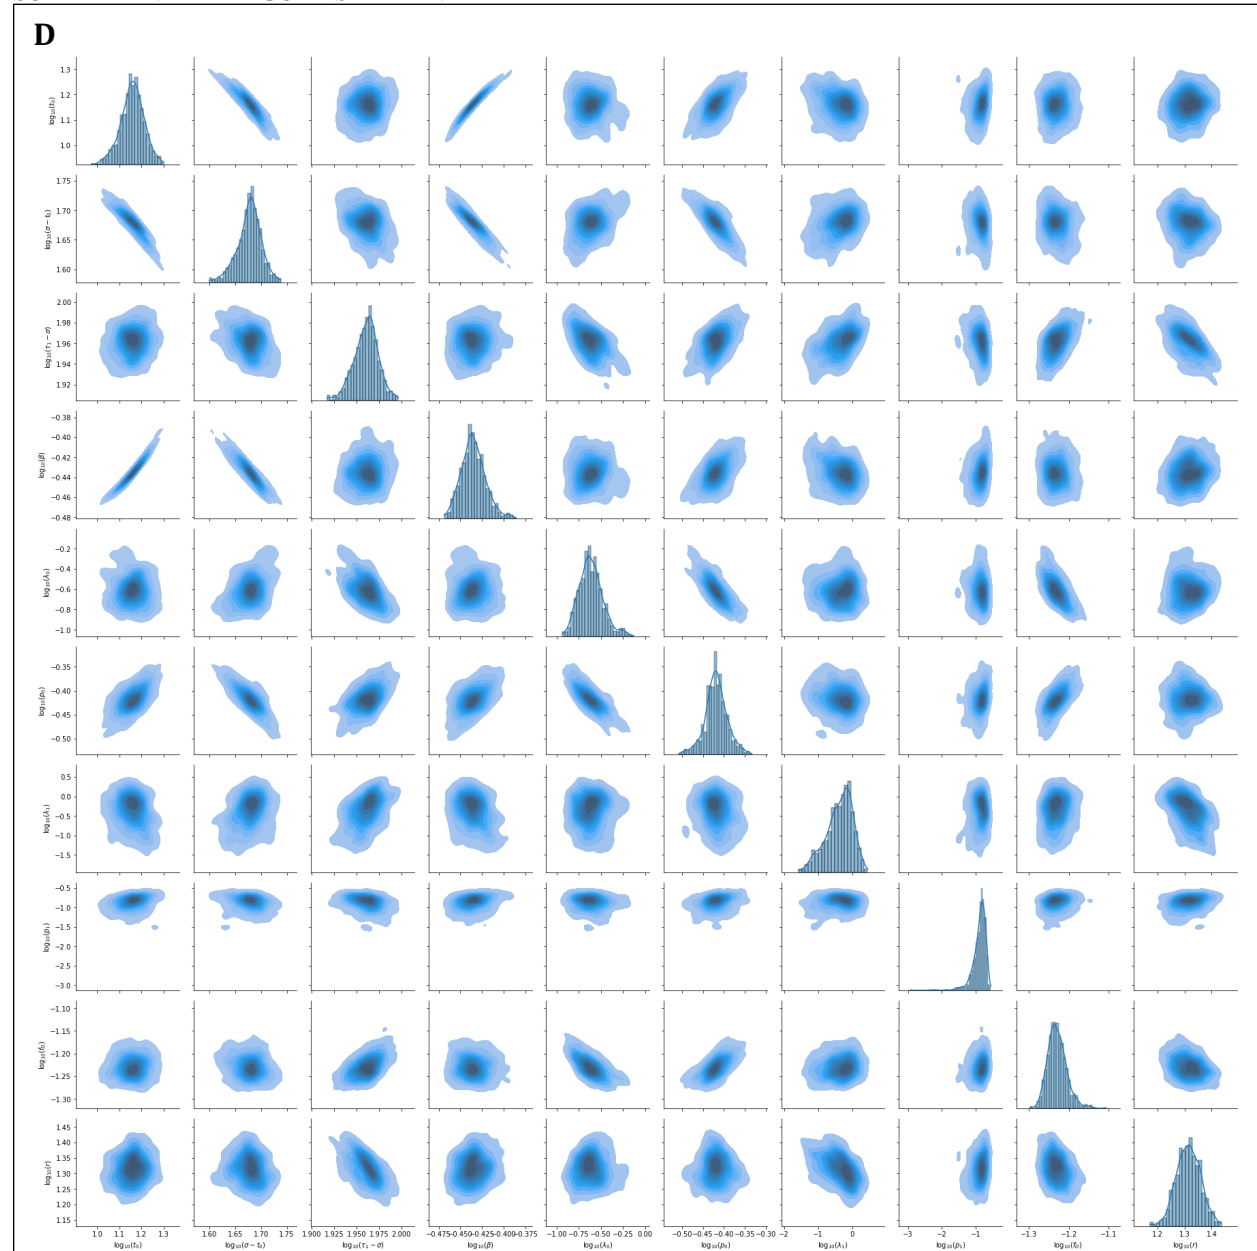

**Supplementary Fig. S11.** Evaluation of PyBNF's *am* method using Test Problem 4F (Supplementary File S4, Washington DC), which is discussed in Supplementary Methods. **(D)** Pairs plot for samples generated using PyBNF's *am* method (cf. Panel E). Off-diagonal panels represent two-dimensional marginalizations of the multivariate parameter posterior and illustrate relationships between pairs of parameters, as indicated. For each off-diagonal panel, the x- and y-axes indicate parameter values, and color indicates probability density. Darker shades indicate higher density. Diagonal panels represent marginal posteriors, which are also shown in Panel B. Each marginal posterior is presented as a histogram and as a smooth curve, which was found via kernel density estimation (KDE) as explained in Supplementary Methods. Each two-dimensional marginalization is presented as a contour plot, which was found via KDE.

## SUPPLEMENTARY FIGURE S11 – PANEL E

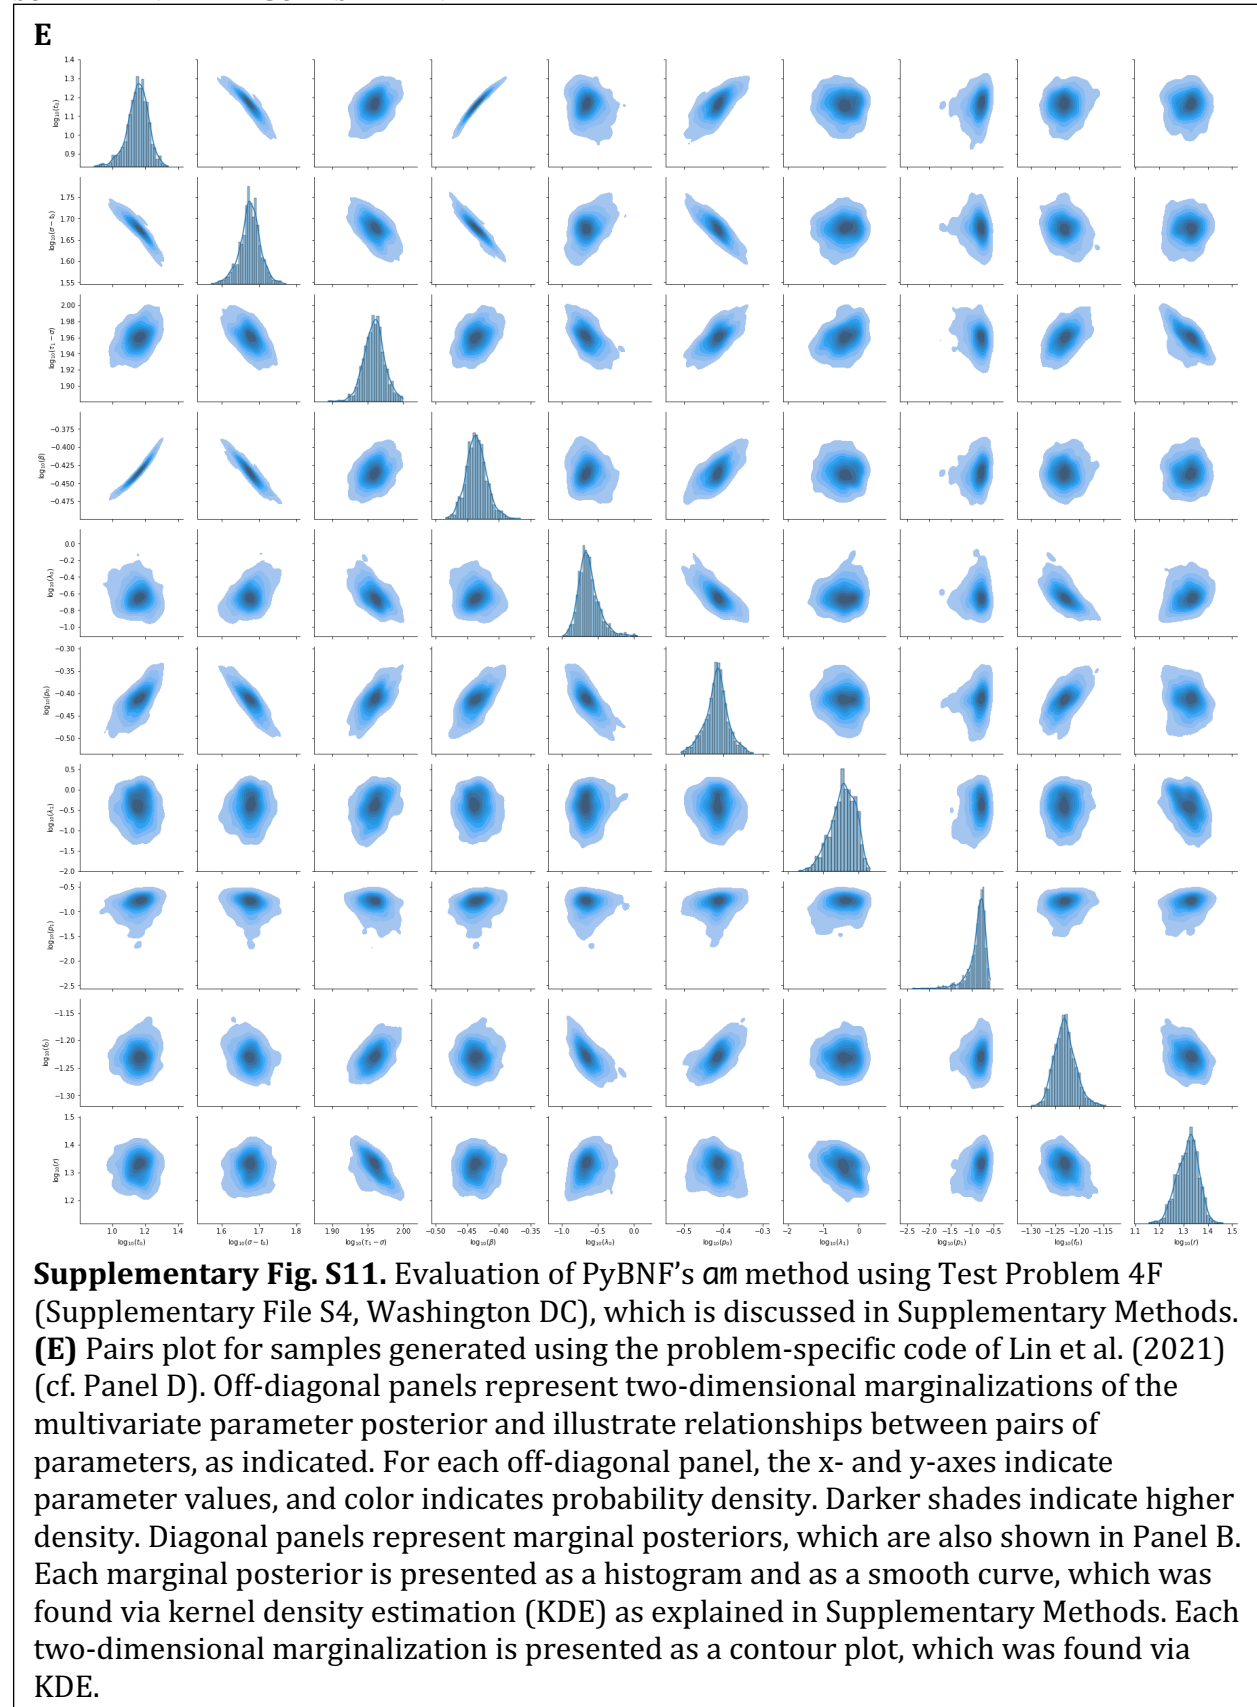

## SUPPLEMENTARY FIGURE S12 – PANEL A

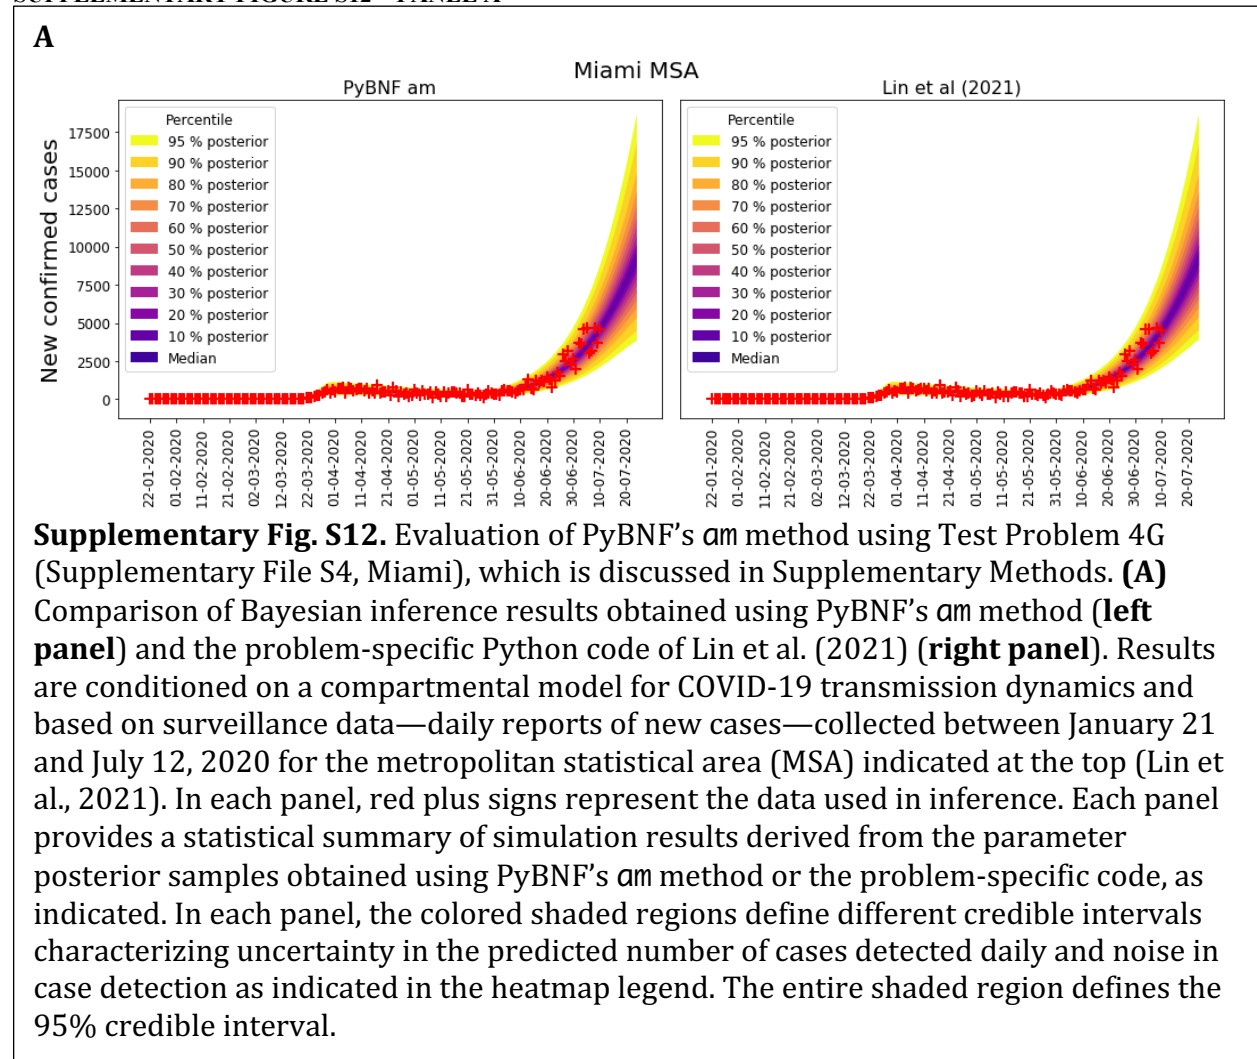

## SUPPLEMENTARY FIGURE S12 – PANEL B

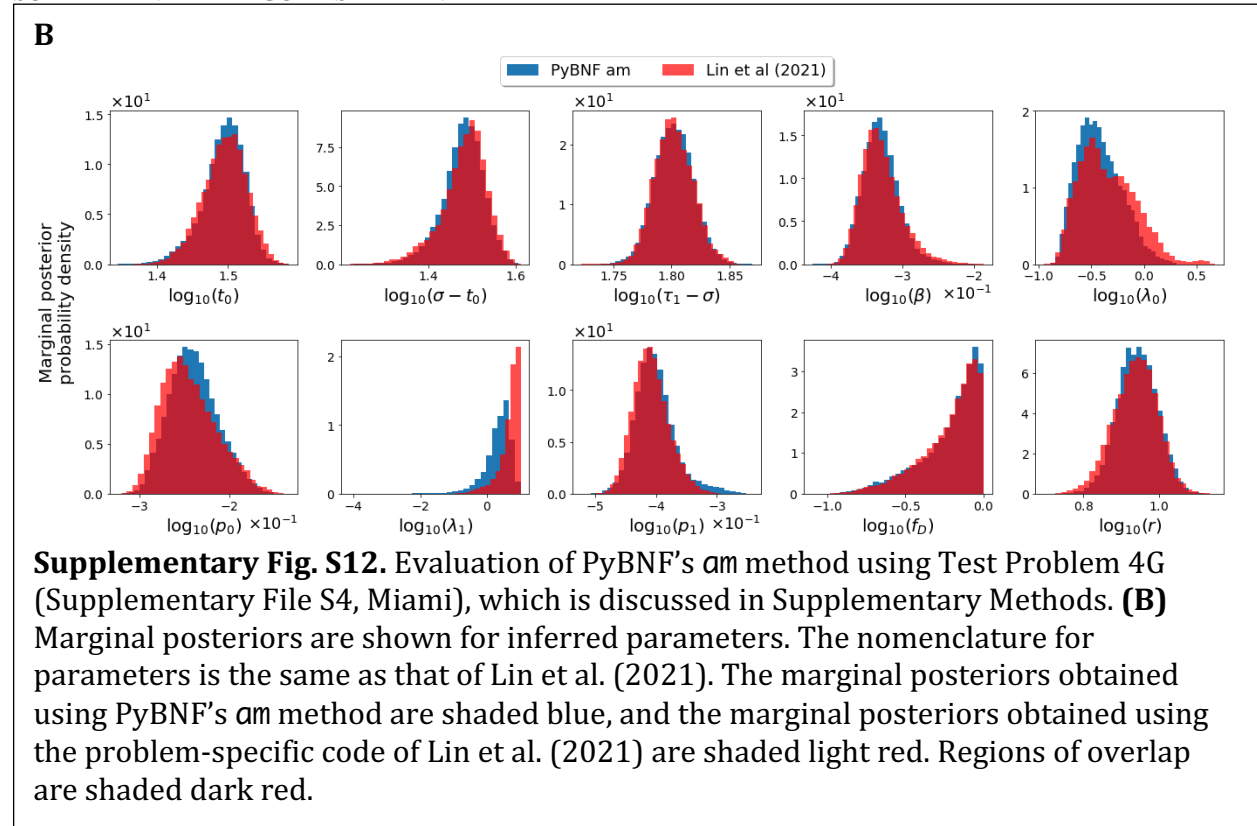

## SUPPLEMENTARY FIGURE S12 – PANEL C

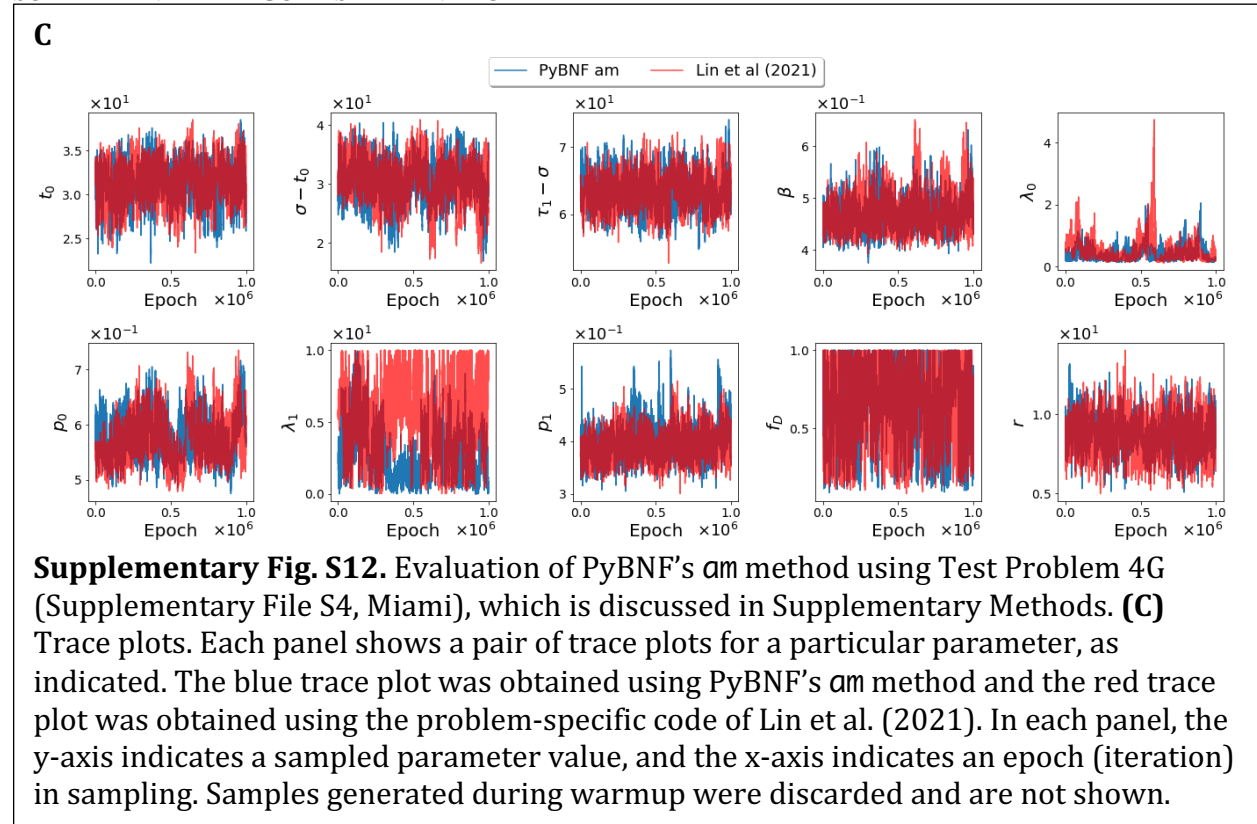

## SUPPLEMENTARY FIGURE S12 – PANEL D

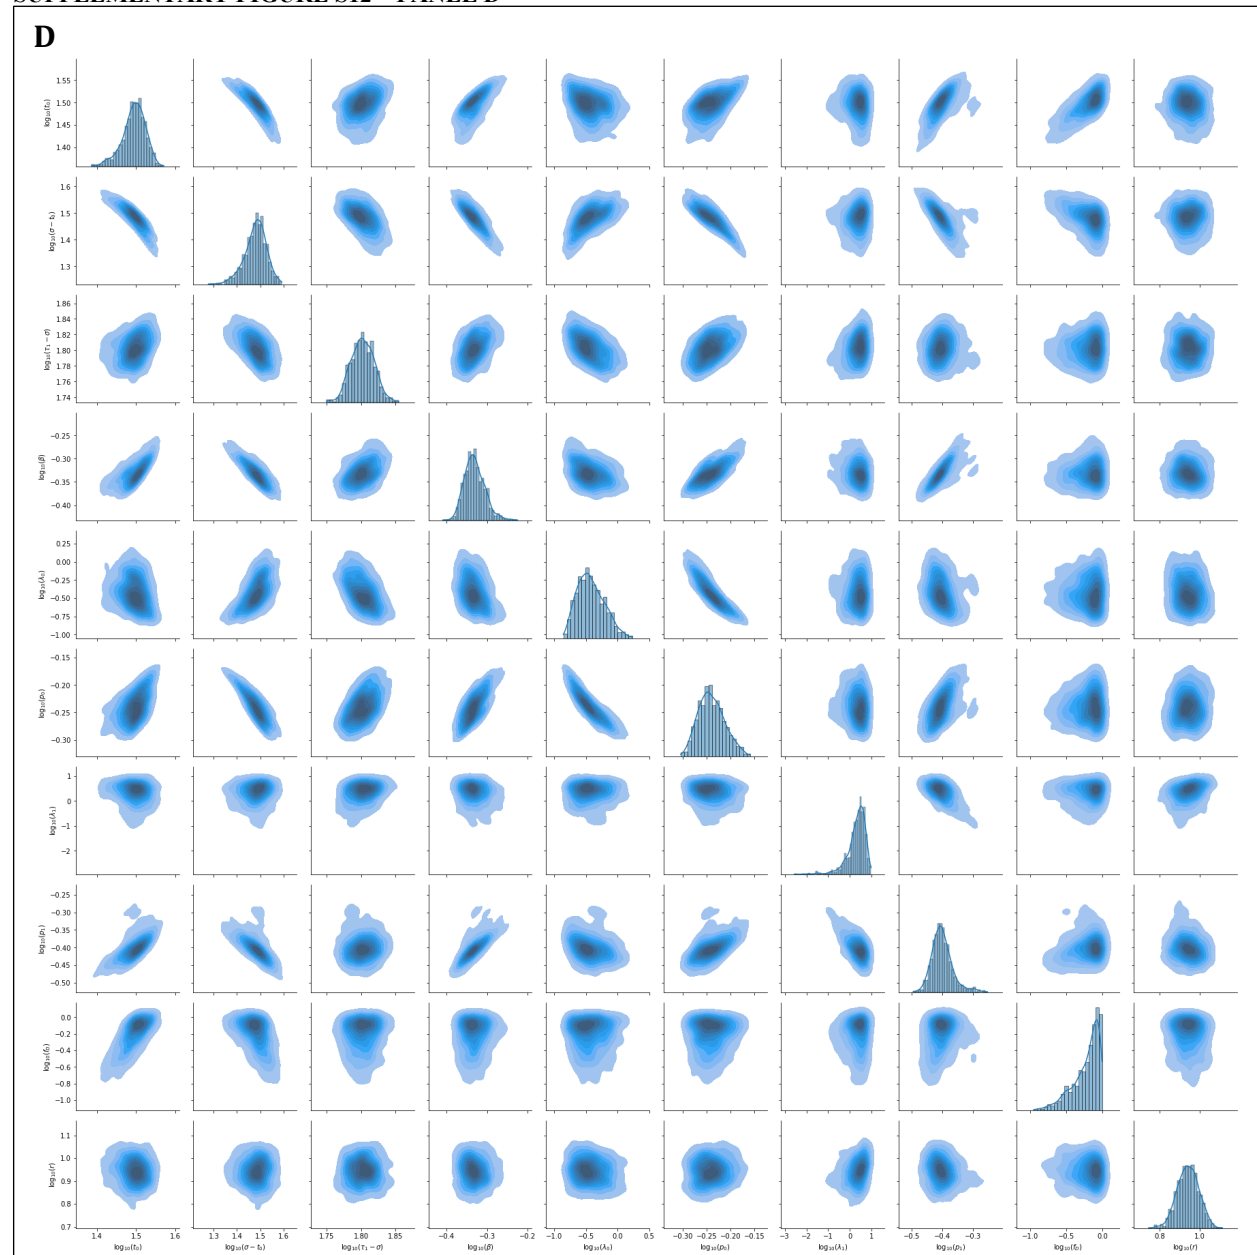

**Supplementary Fig. S12.** Evaluation of PyBNF’s *am* method using Test Problem 4G (Supplementary File S4, Miami), which is discussed in Supplementary Methods. **(D)** Pairs plot for samples generated using PyBNF’s *am* method (cf. Panel E). Off-diagonal panels represent two-dimensional marginalizations of the multivariate parameter posterior and illustrate relationships between pairs of parameters, as indicated. For each off-diagonal panel, the x- and y-axes indicate parameter values, and color indicates probability density. Darker shades indicate higher density. Diagonal panels represent marginal posteriors, which are also shown in Panel B. Each marginal posterior is presented as a histogram and as a smooth curve, which was found via kernel density estimation (KDE) as explained in Supplementary Methods. Each two-dimensional marginalization is presented as a contour plot, which was found via KDE.

## SUPPLEMENTARY FIGURE S12 – PANEL E

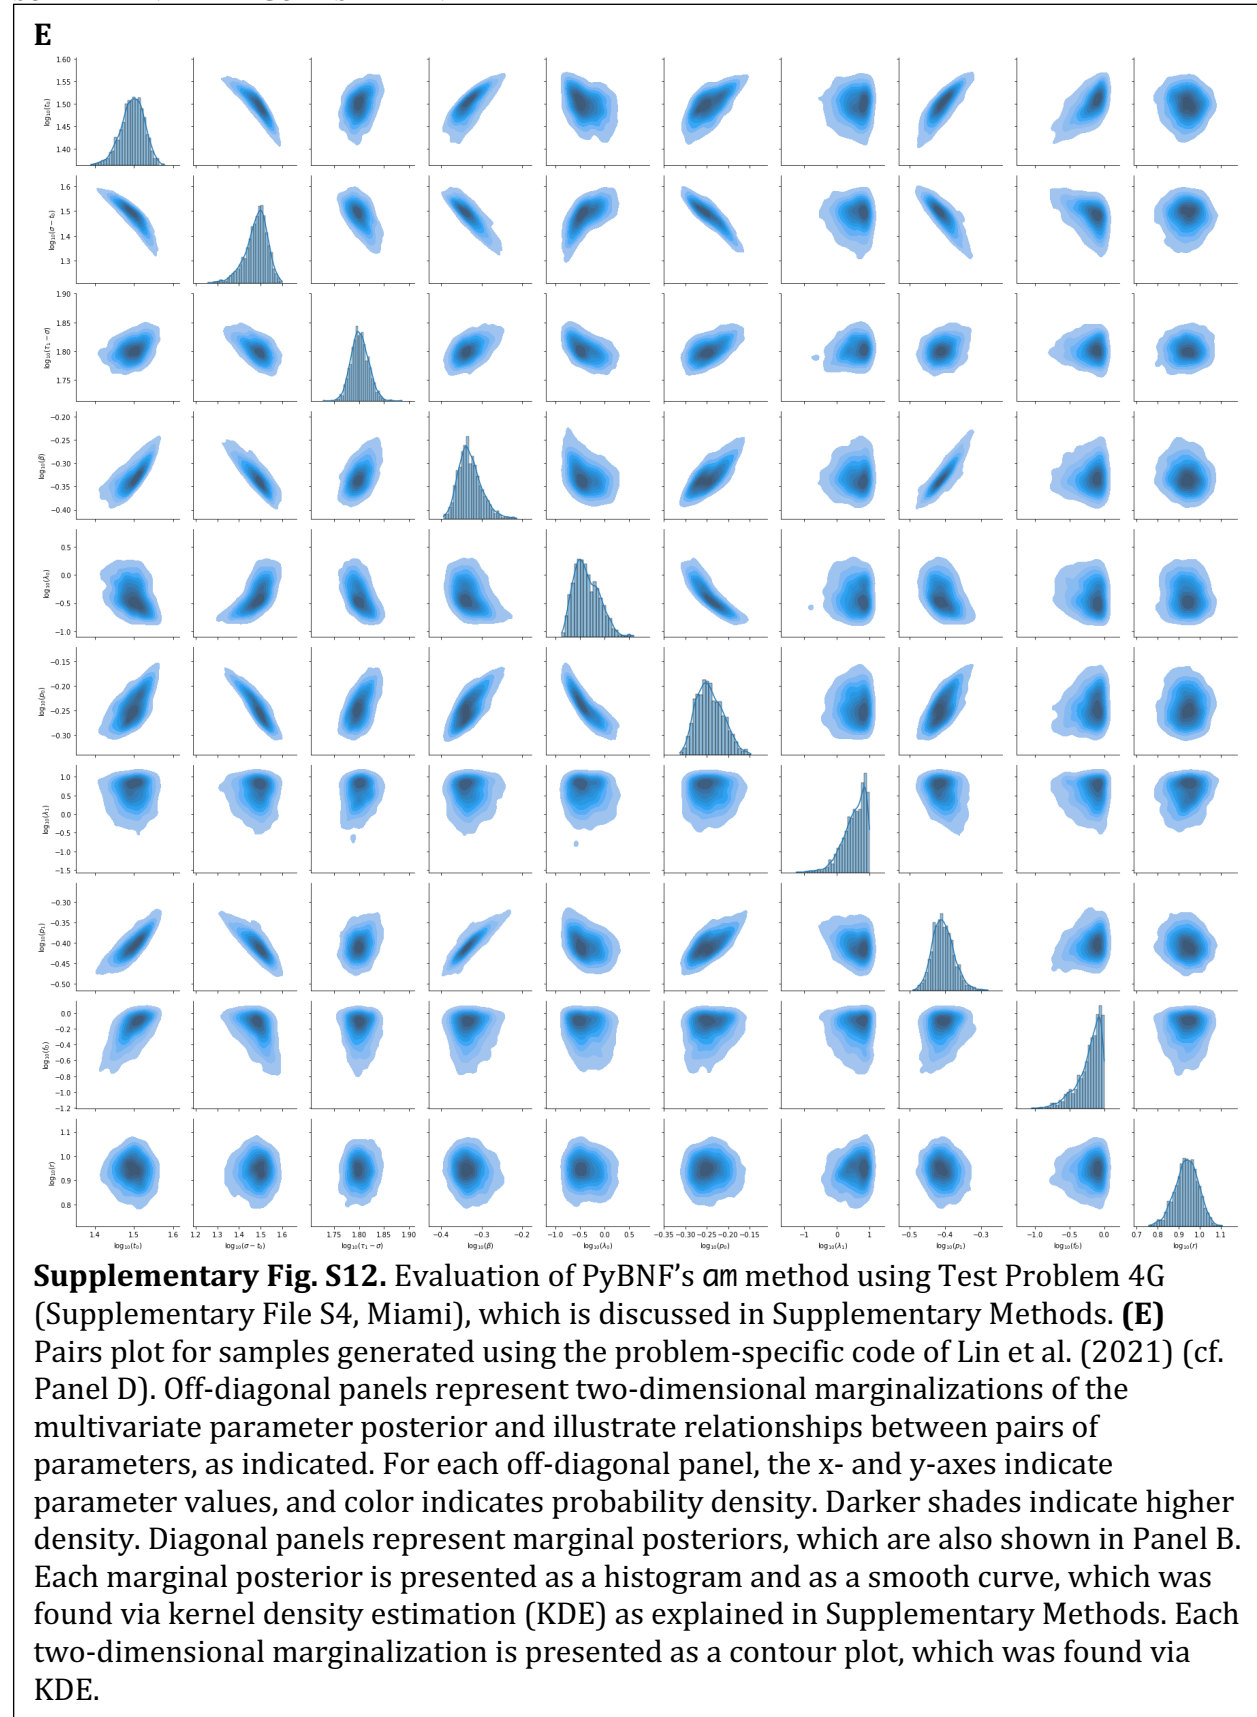



## SUPPLEMENTARY FIGURE S13 – PANEL A

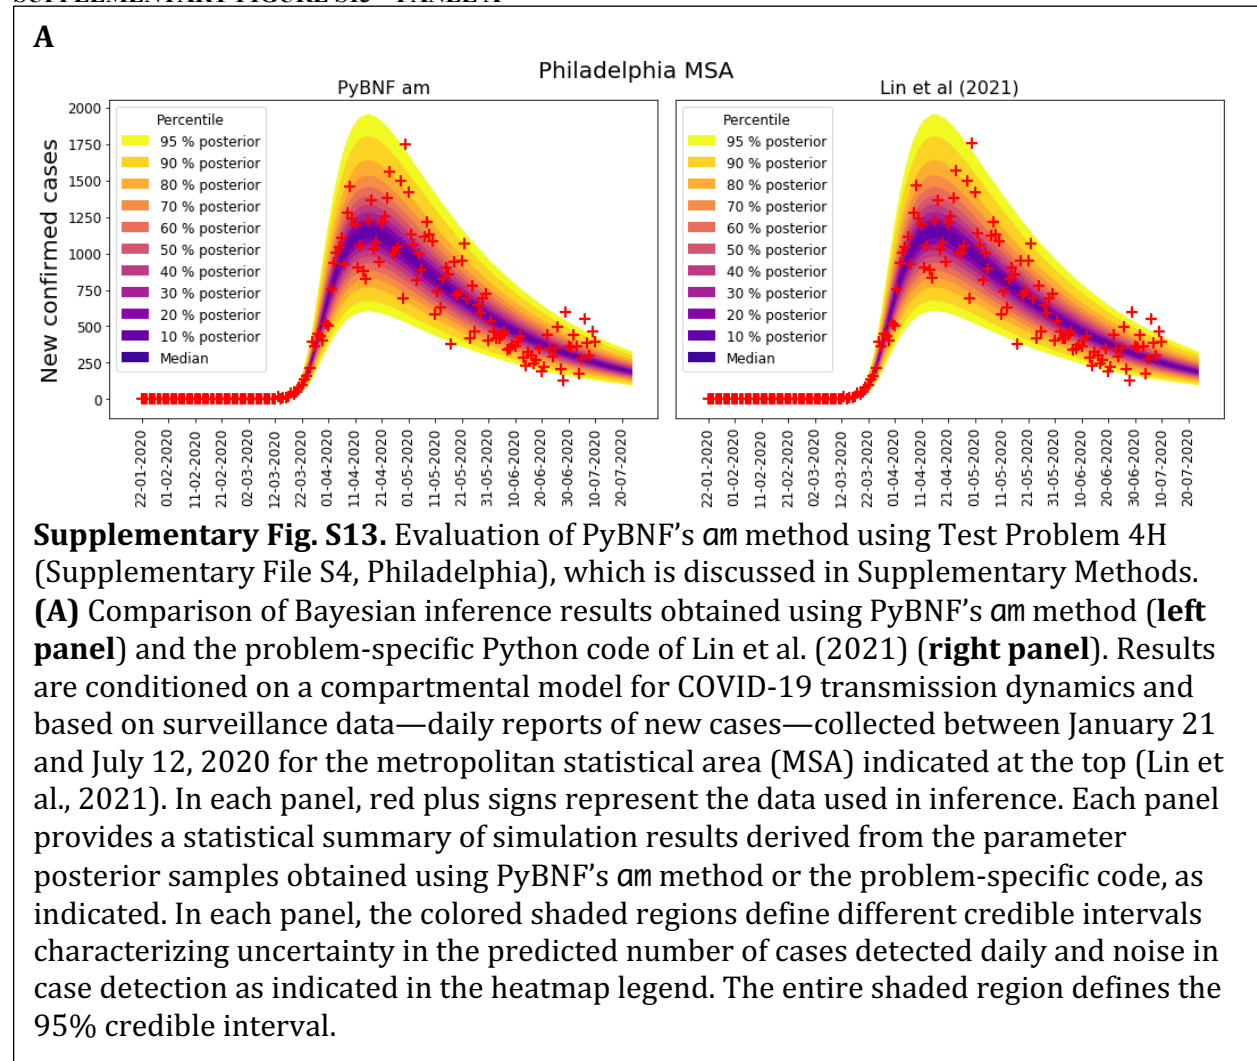

## SUPPLEMENTARY FIGURE S13 – PANEL B

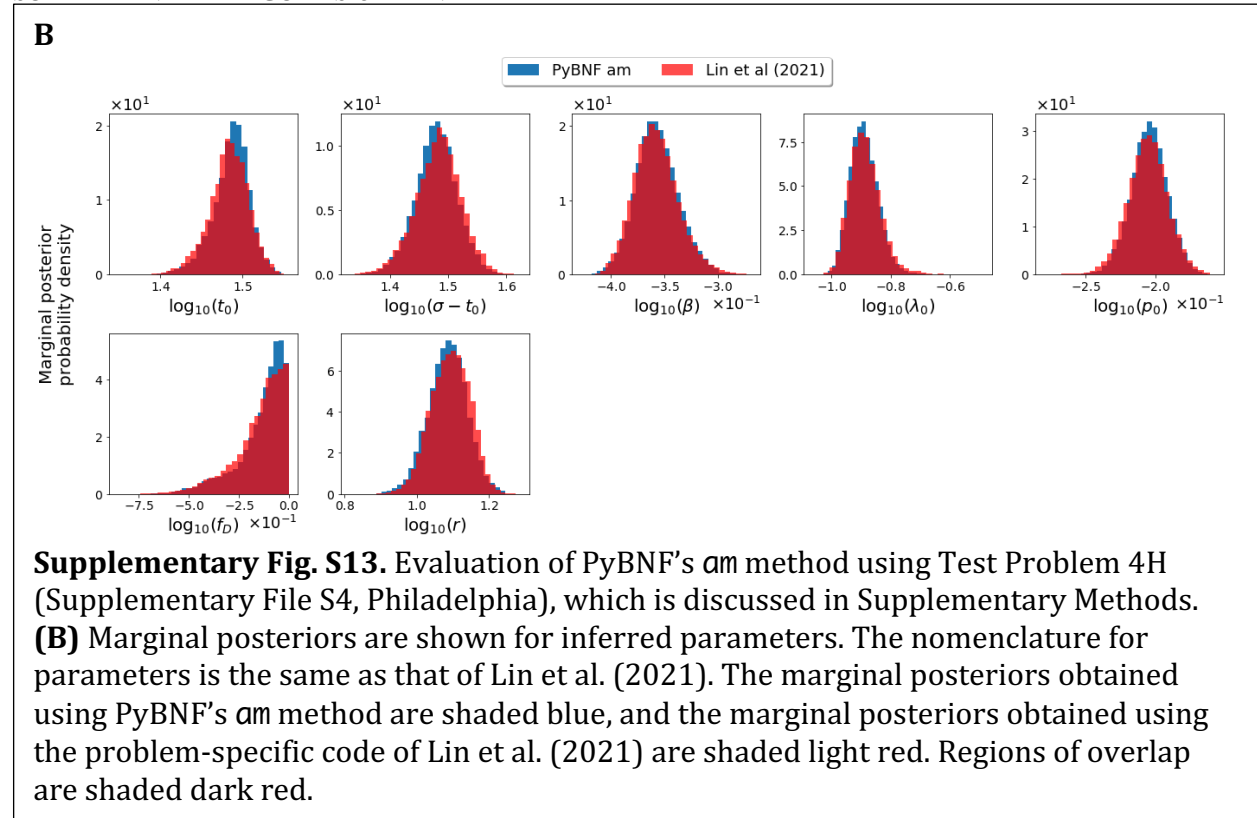

## SUPPLEMENTARY FIGURE S13 – PANEL C

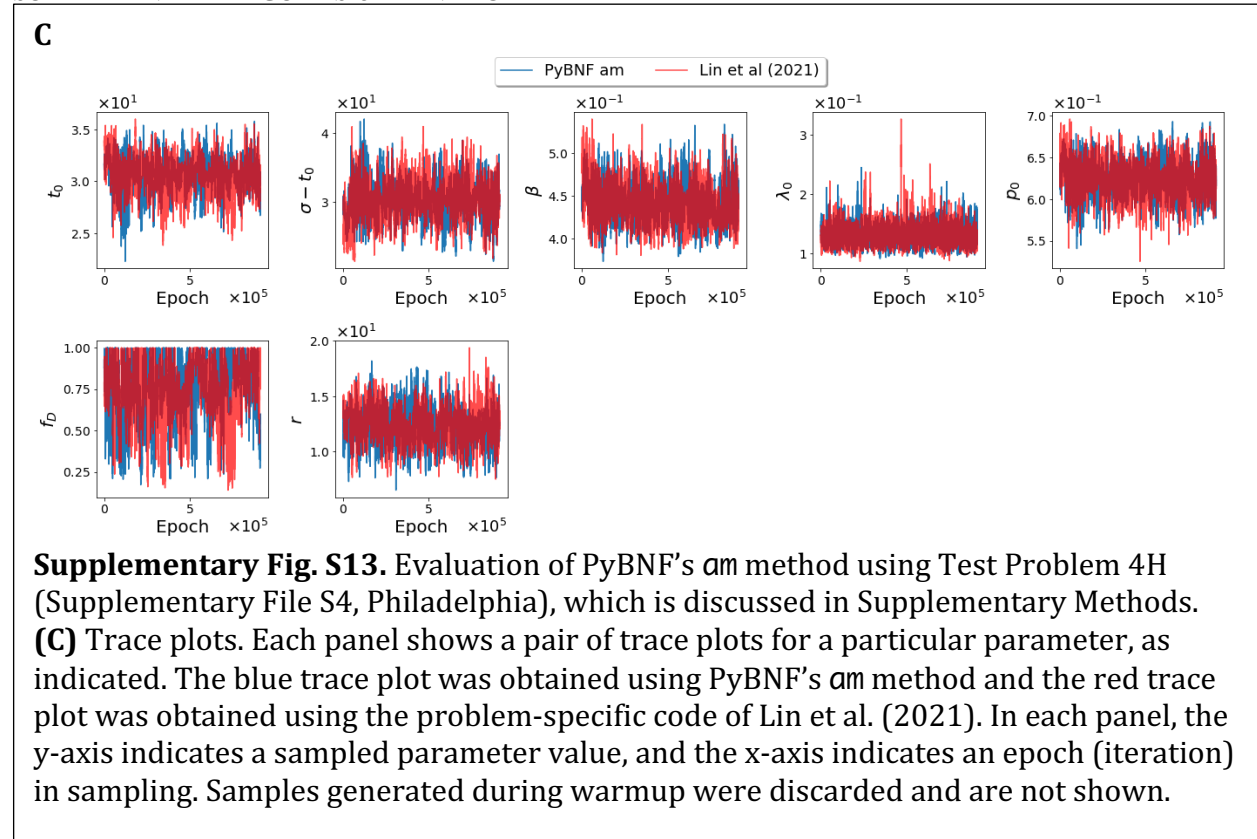

## SUPPLEMENTARY FIGURE S13 – PANEL D

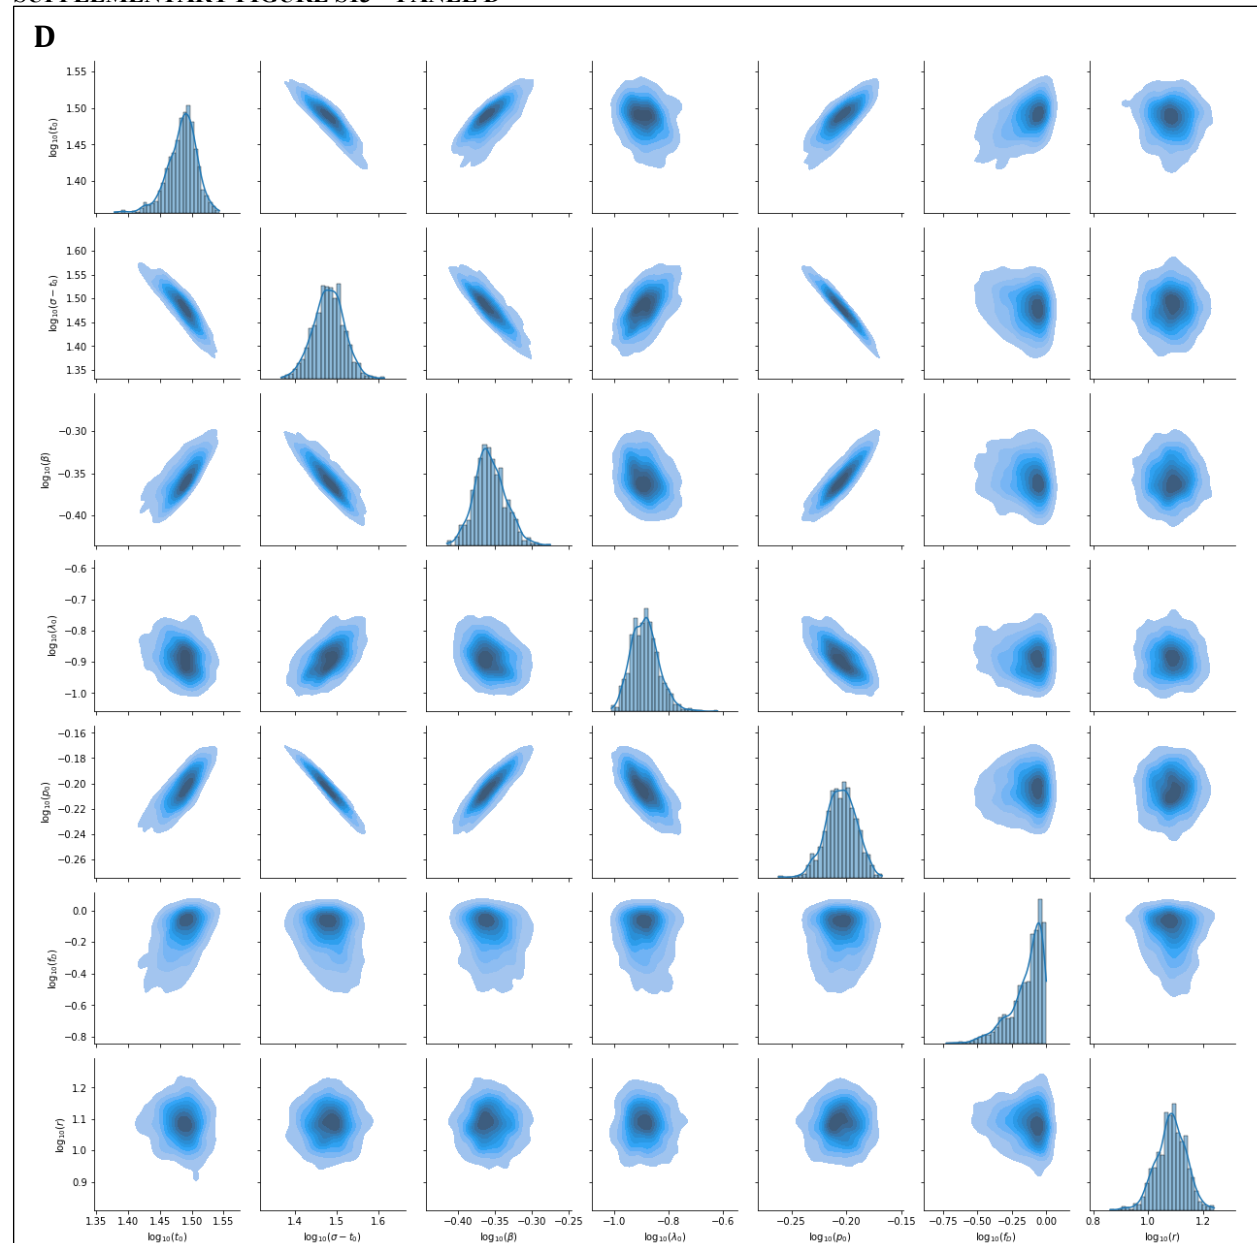

**Supplementary Fig. S13.** Evaluation of PyBNF's `am` method using Test Problem 4H (Supplementary File S4, Philadelphia), which is discussed in Supplementary Methods. **(D)** Pairs plot for samples generated using PyBNF's `am` method (cf. Panel E). Off-diagonal panels represent two-dimensional marginalizations of the multivariate parameter posterior and illustrate relationships between pairs of parameters, as indicated. For each off-diagonal panel, the x- and y-axes indicate parameter values, and color indicates probability density. Darker shades indicate higher density. Diagonal panels represent marginal posteriors, which are also shown in Panel B. Each marginal posterior is presented as a histogram and as a smooth curve, which was found via kernel density estimation (KDE) as explained in Supplementary Methods. Each two-dimensional marginalization is presented as a contour plot, which was found via KDE.

## SUPPLEMENTARY FIGURE S13 – PANEL E

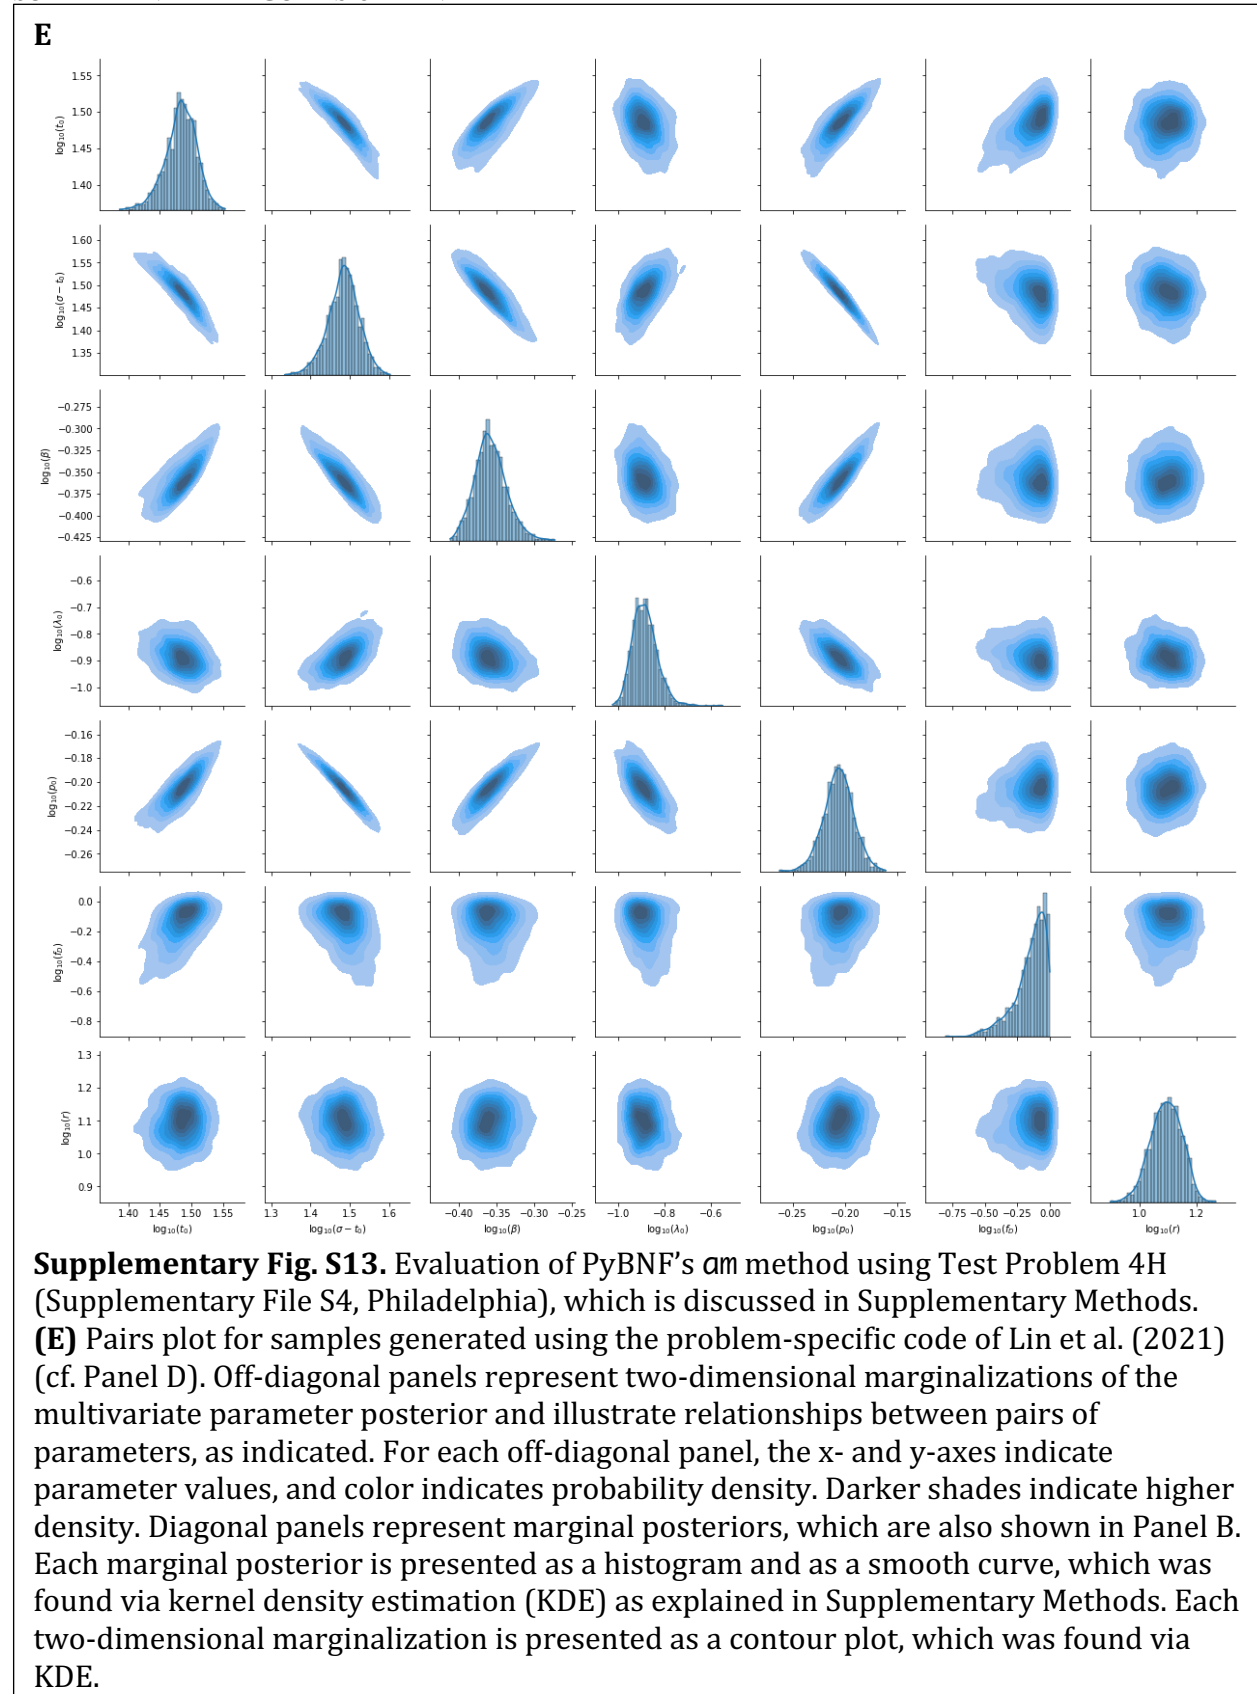

## SUPPLEMENTARY FIGURE S14 – PANEL A

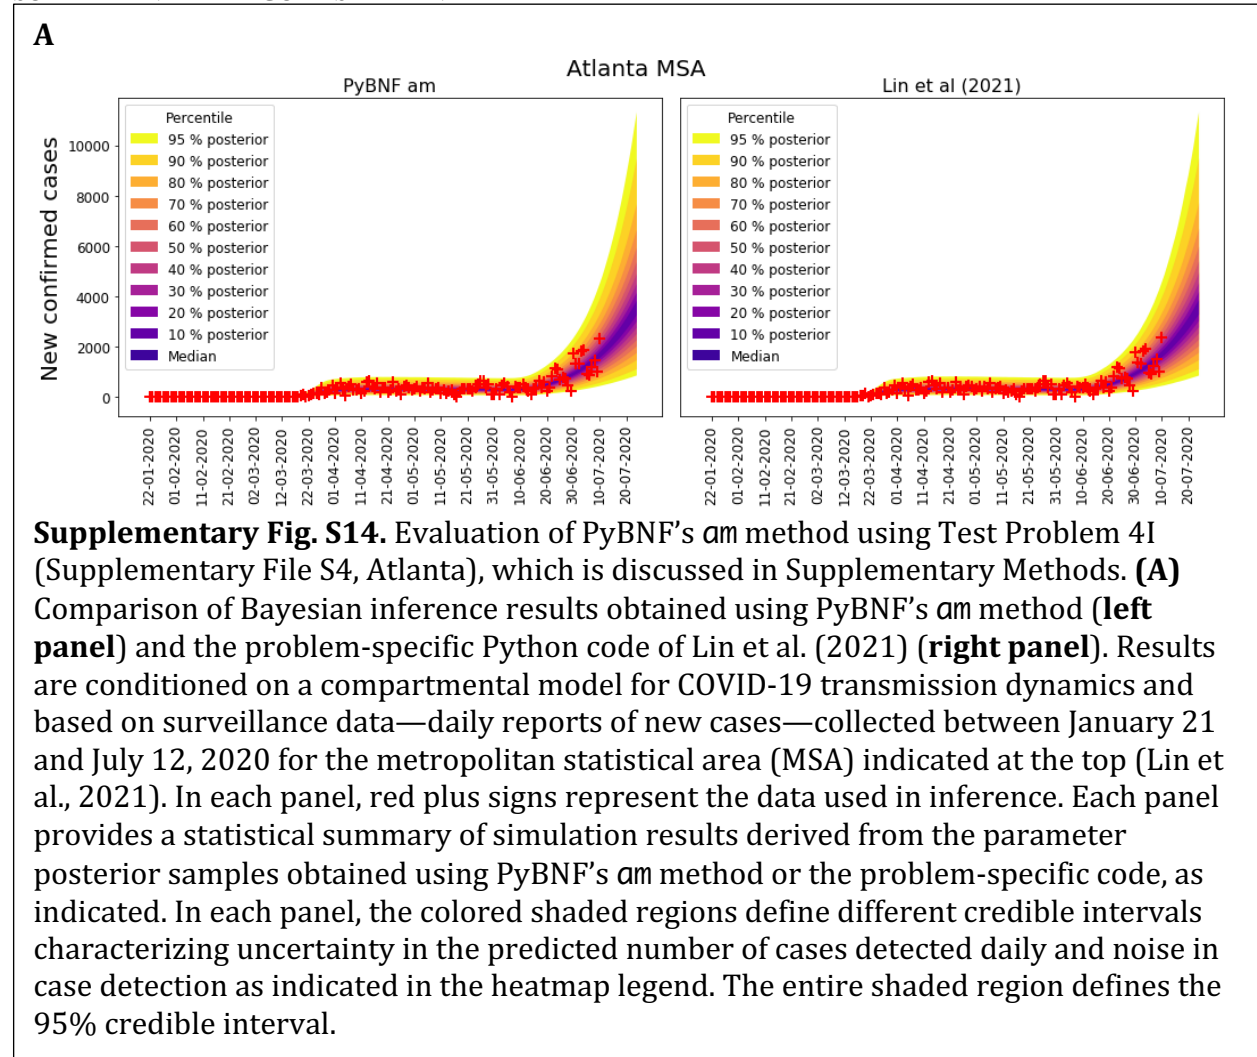

## SUPPLEMENTARY FIGURE S14 – PANEL B

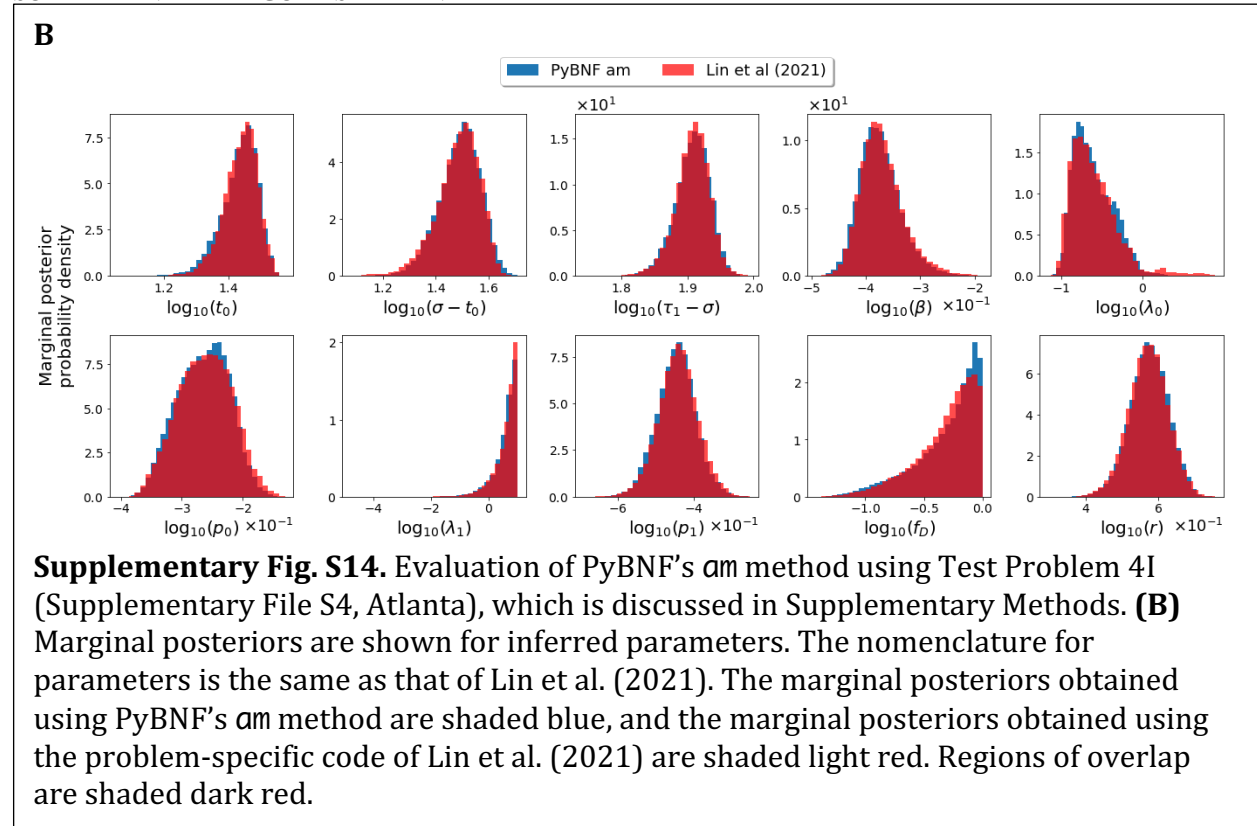

## SUPPLEMENTARY FIGURE S14 – PANEL C

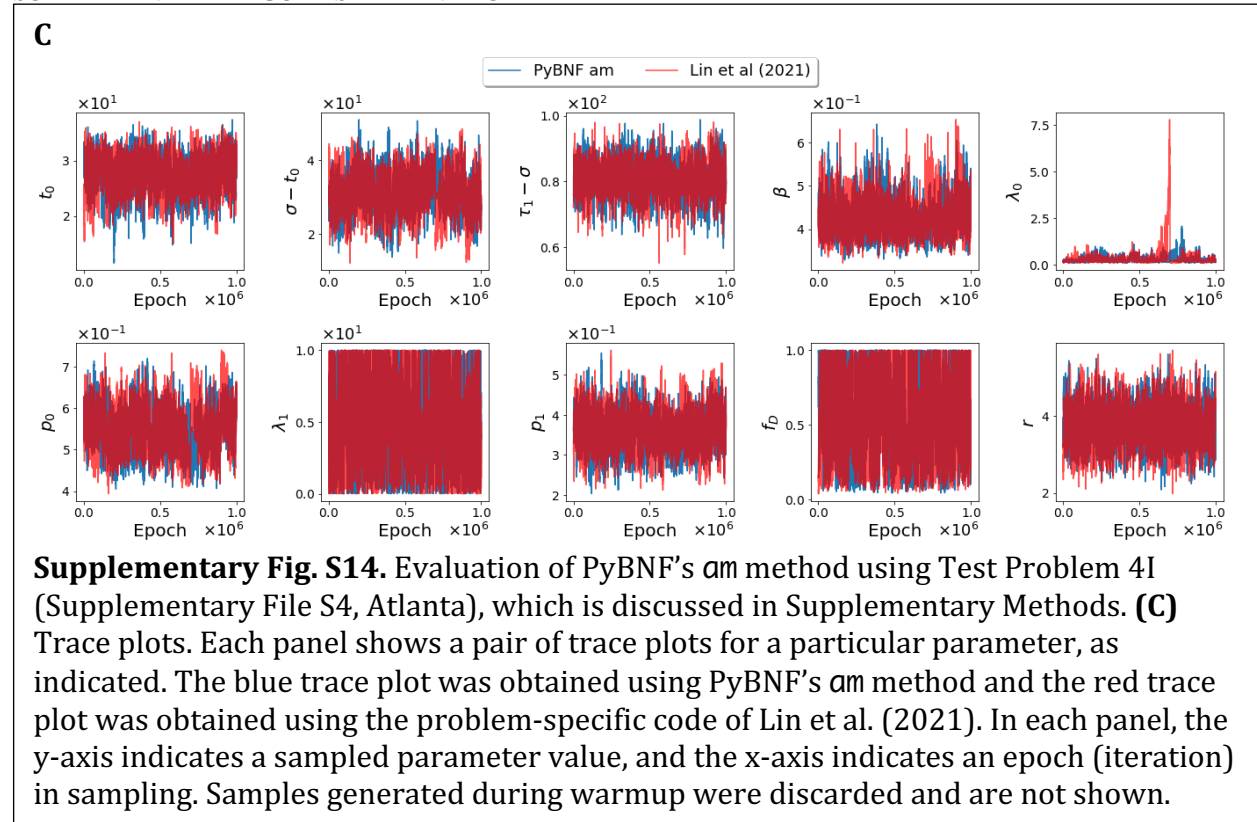



## SUPPLEMENTARY FIGURE S14 – PANEL D

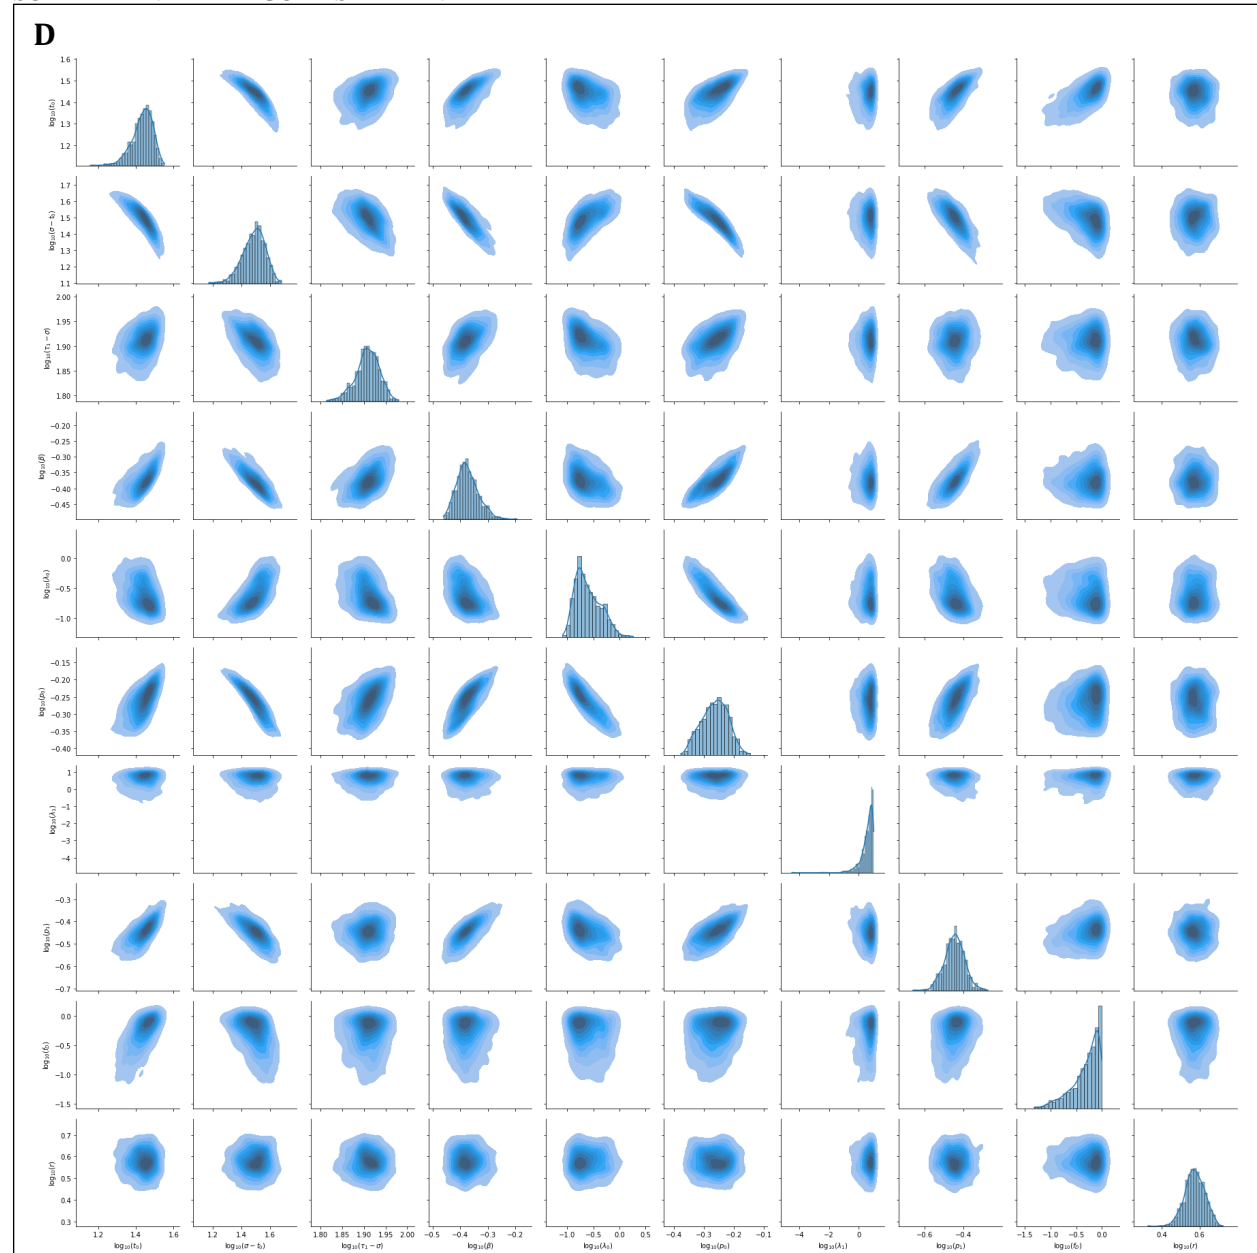

**Supplementary Fig. S14.** Evaluation of PyBNF’s *am* method using Test Problem 4I (Supplementary File S4, Atlanta), which is discussed in Supplementary Methods. **(D)** Pairs plot for samples generated using PyBNF’s *am* method (cf. Panel E). Off-diagonal panels represent two-dimensional marginalizations of the multivariate parameter posterior and illustrate relationships between pairs of parameters, as indicated. For each off-diagonal panel, the x- and y-axes indicate parameter values, and color indicates probability density. Darker shades indicate higher density. Diagonal panels represent marginal posteriors, which are also shown in Panel B. Each marginal posterior is presented as a histogram and as a smooth curve, which was found via kernel density estimation (KDE) as explained in Supplementary Methods. Each two-dimensional marginalization is presented as a contour plot, which was found via KDE.

## SUPPLEMENTARY FIGURE S14 – PANEL E

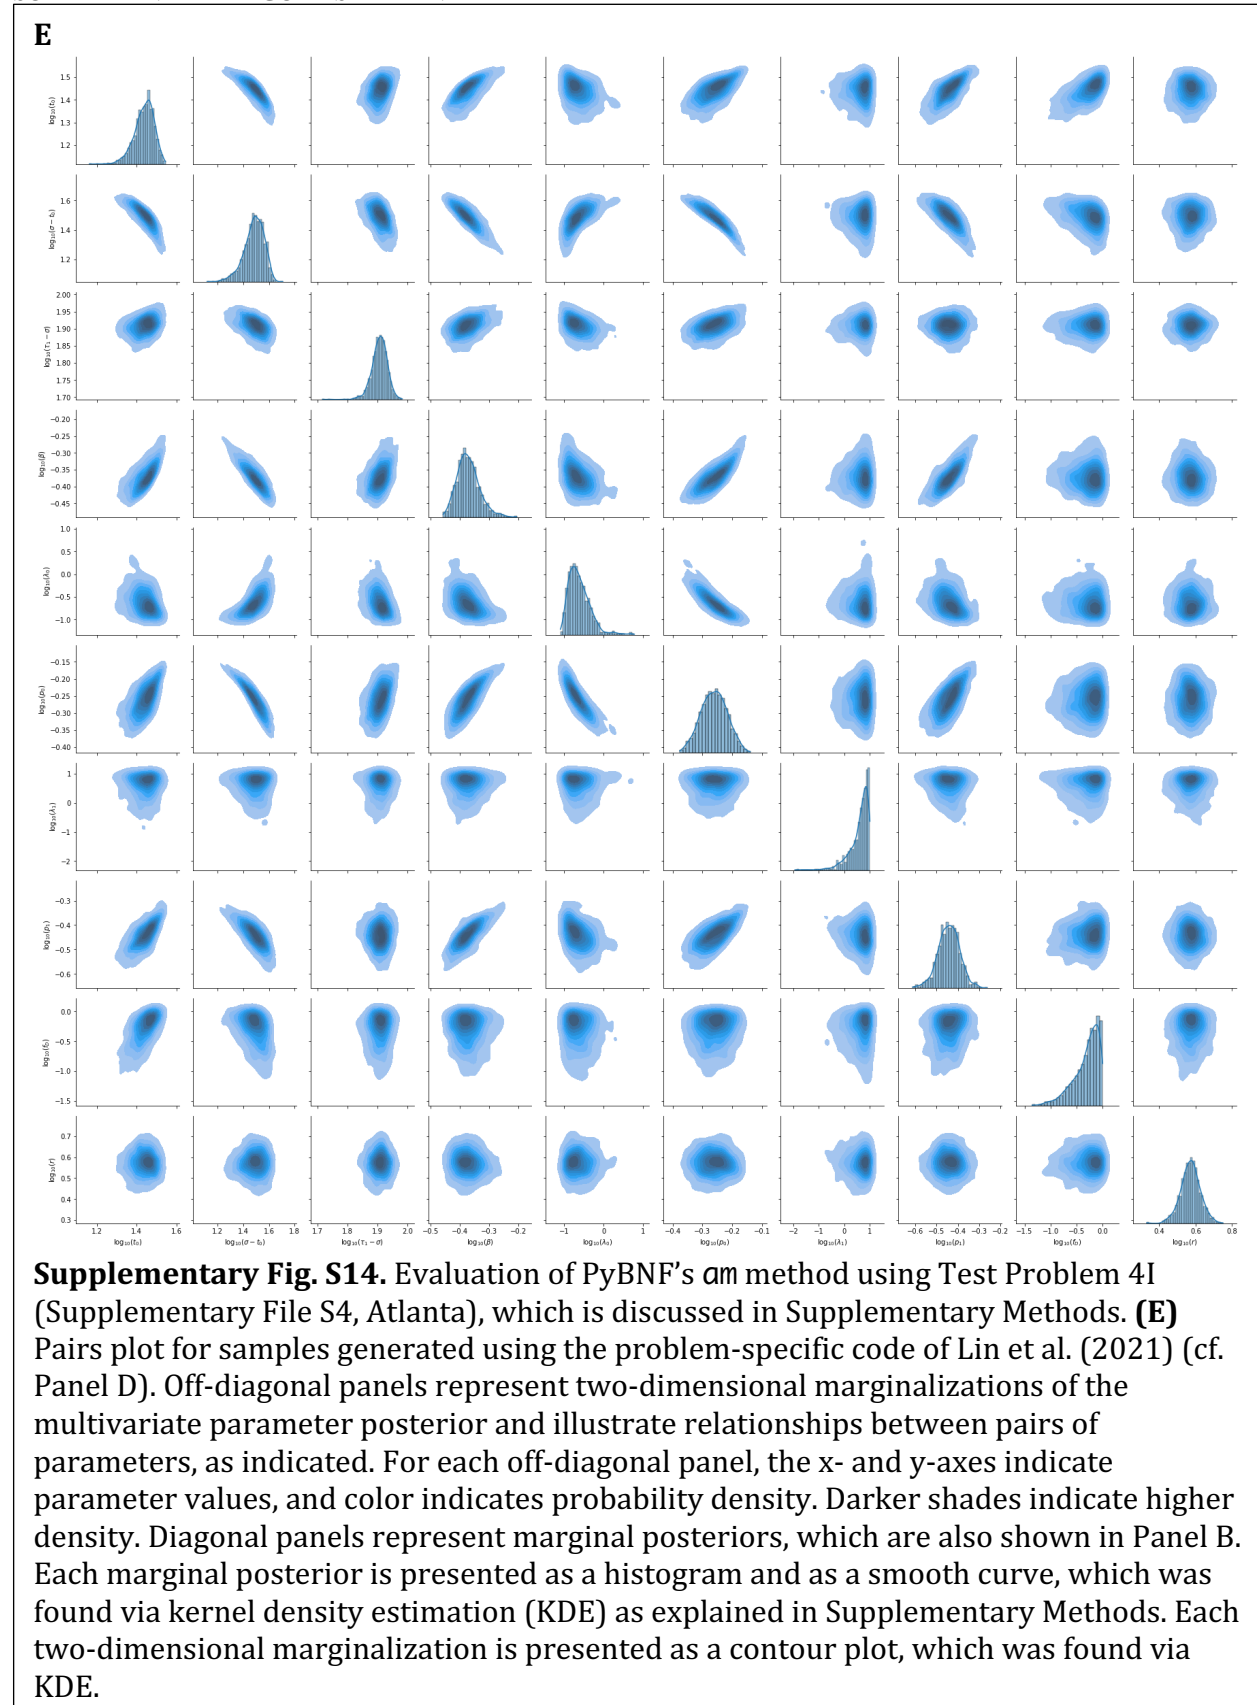

## SUPPLEMENTARY FIGURE S15 – PANEL A

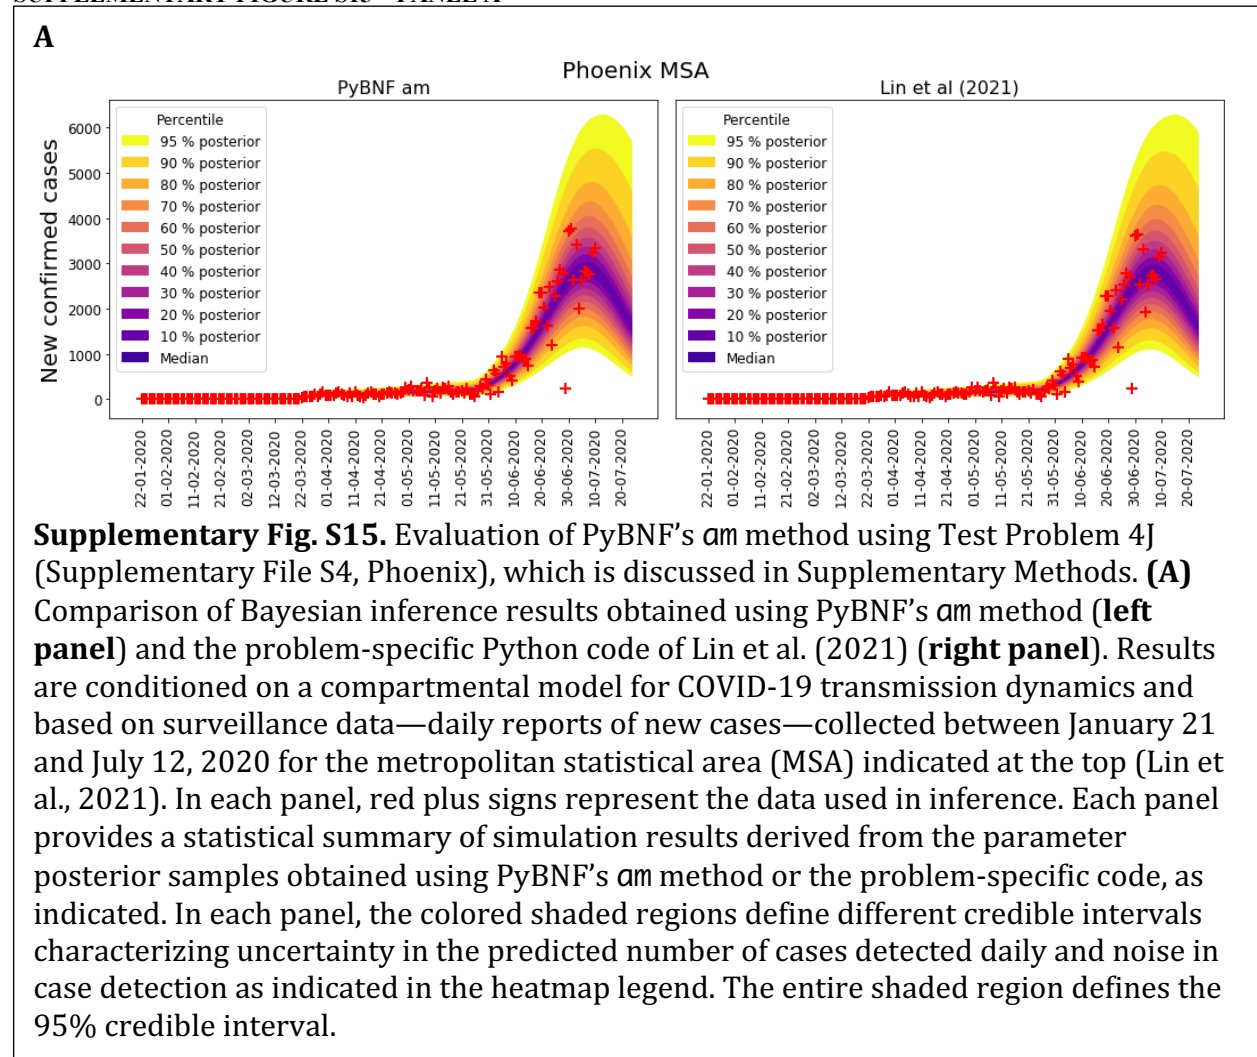

## SUPPLEMENTARY FIGURE S15 – PANEL B

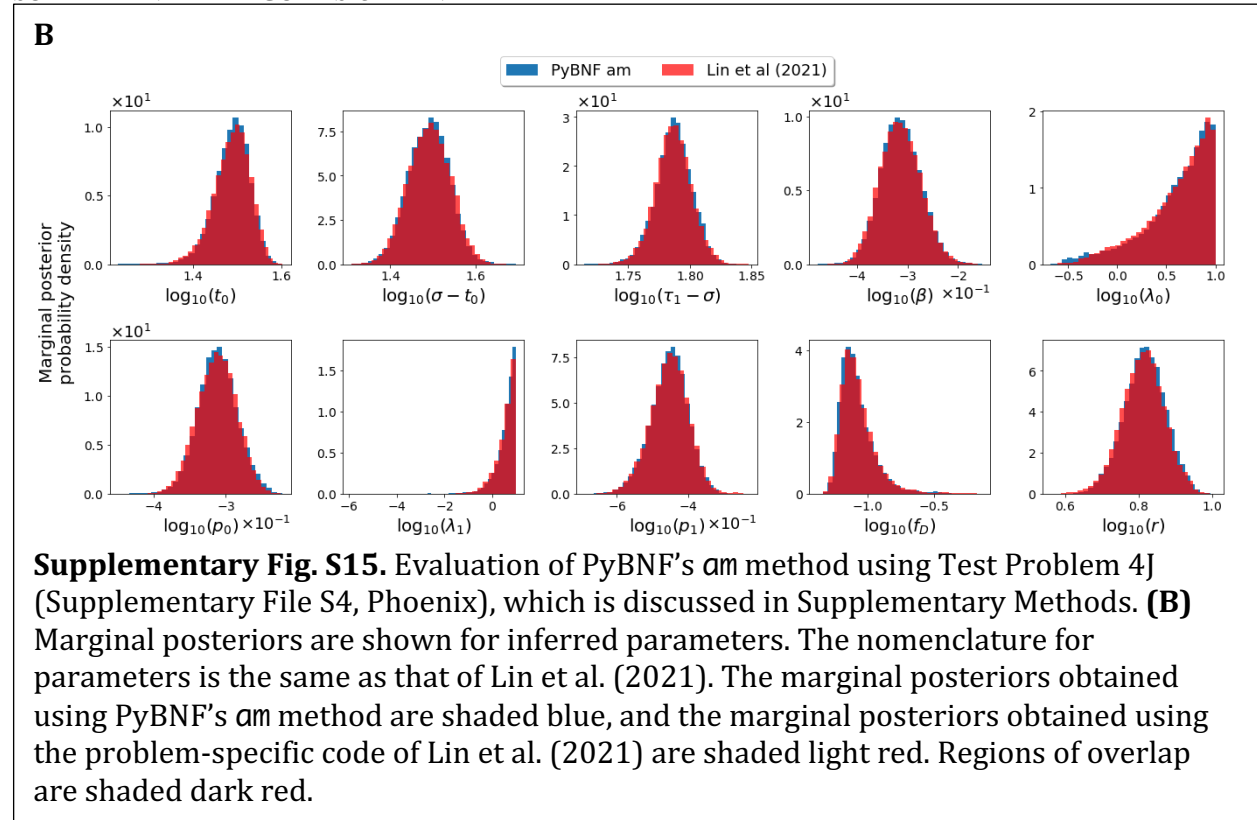

## SUPPLEMENTARY FIGURE S15 – PANEL C

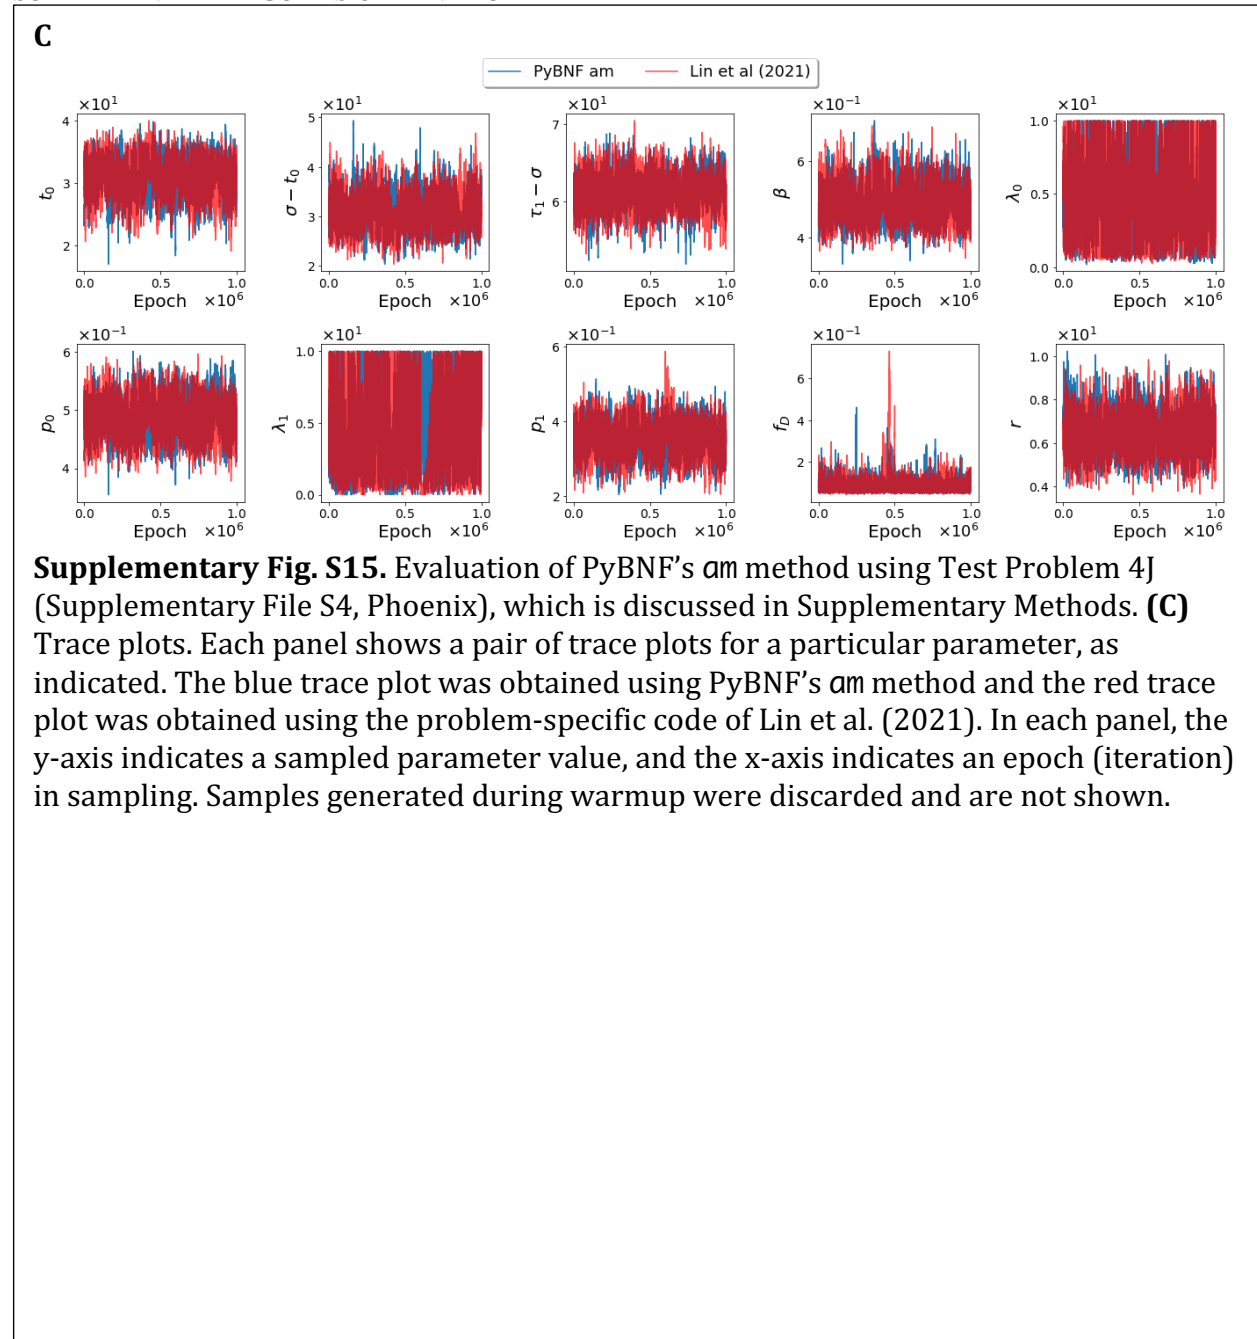

## SUPPLEMENTARY FIGURE S15 – PANEL D

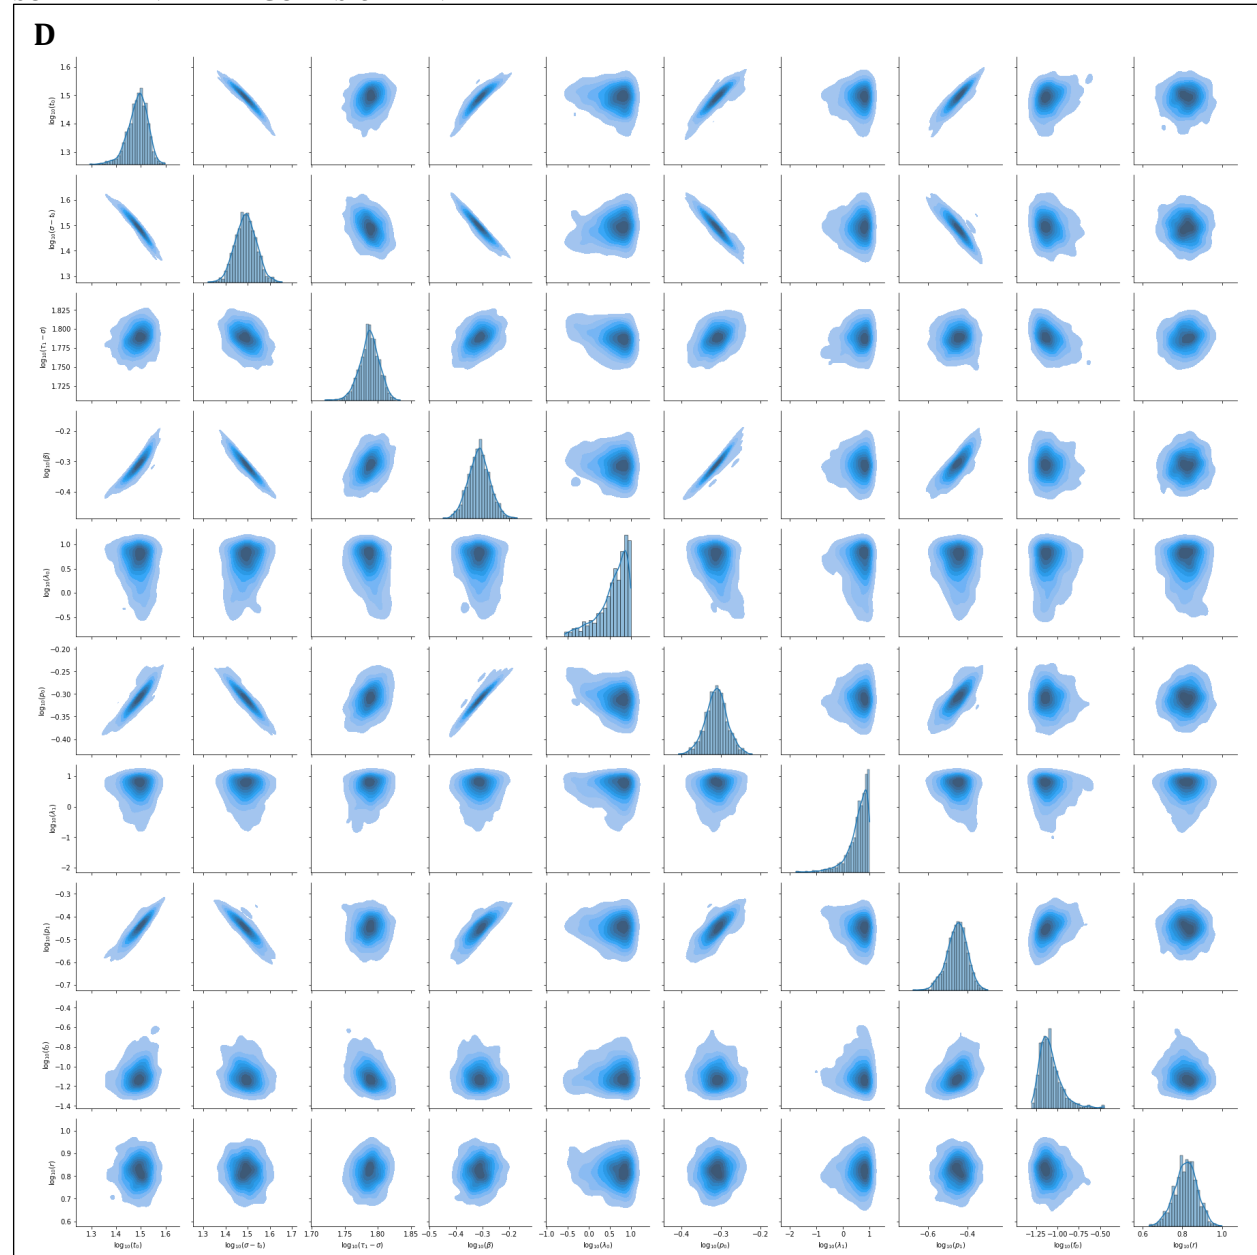

**Supplementary Fig. S15.** Evaluation of PyBNF’s *am* method using Test Problem 4J (Supplementary File S4, Phoenix), which is discussed in Supplementary Methods. **(D)** Pairs plot for samples generated using PyBNF’s *am* method (cf. Panel E). Off-diagonal panels represent two-dimensional marginalizations of the multivariate parameter posterior and illustrate relationships between pairs of parameters, as indicated. For each off-diagonal panel, the x- and y-axes indicate parameter values, and color indicates probability density. Darker shades indicate higher density. Diagonal panels represent marginal posteriors, which are also shown in Panel B. Each marginal posterior is presented as a histogram and as a smooth curve, which was found via kernel density estimation (KDE) as explained in Supplementary Methods. Each two-dimensional marginalization is presented as a contour plot, which was found via KDE.

## SUPPLEMENTARY FIGURE S15 – PANEL E

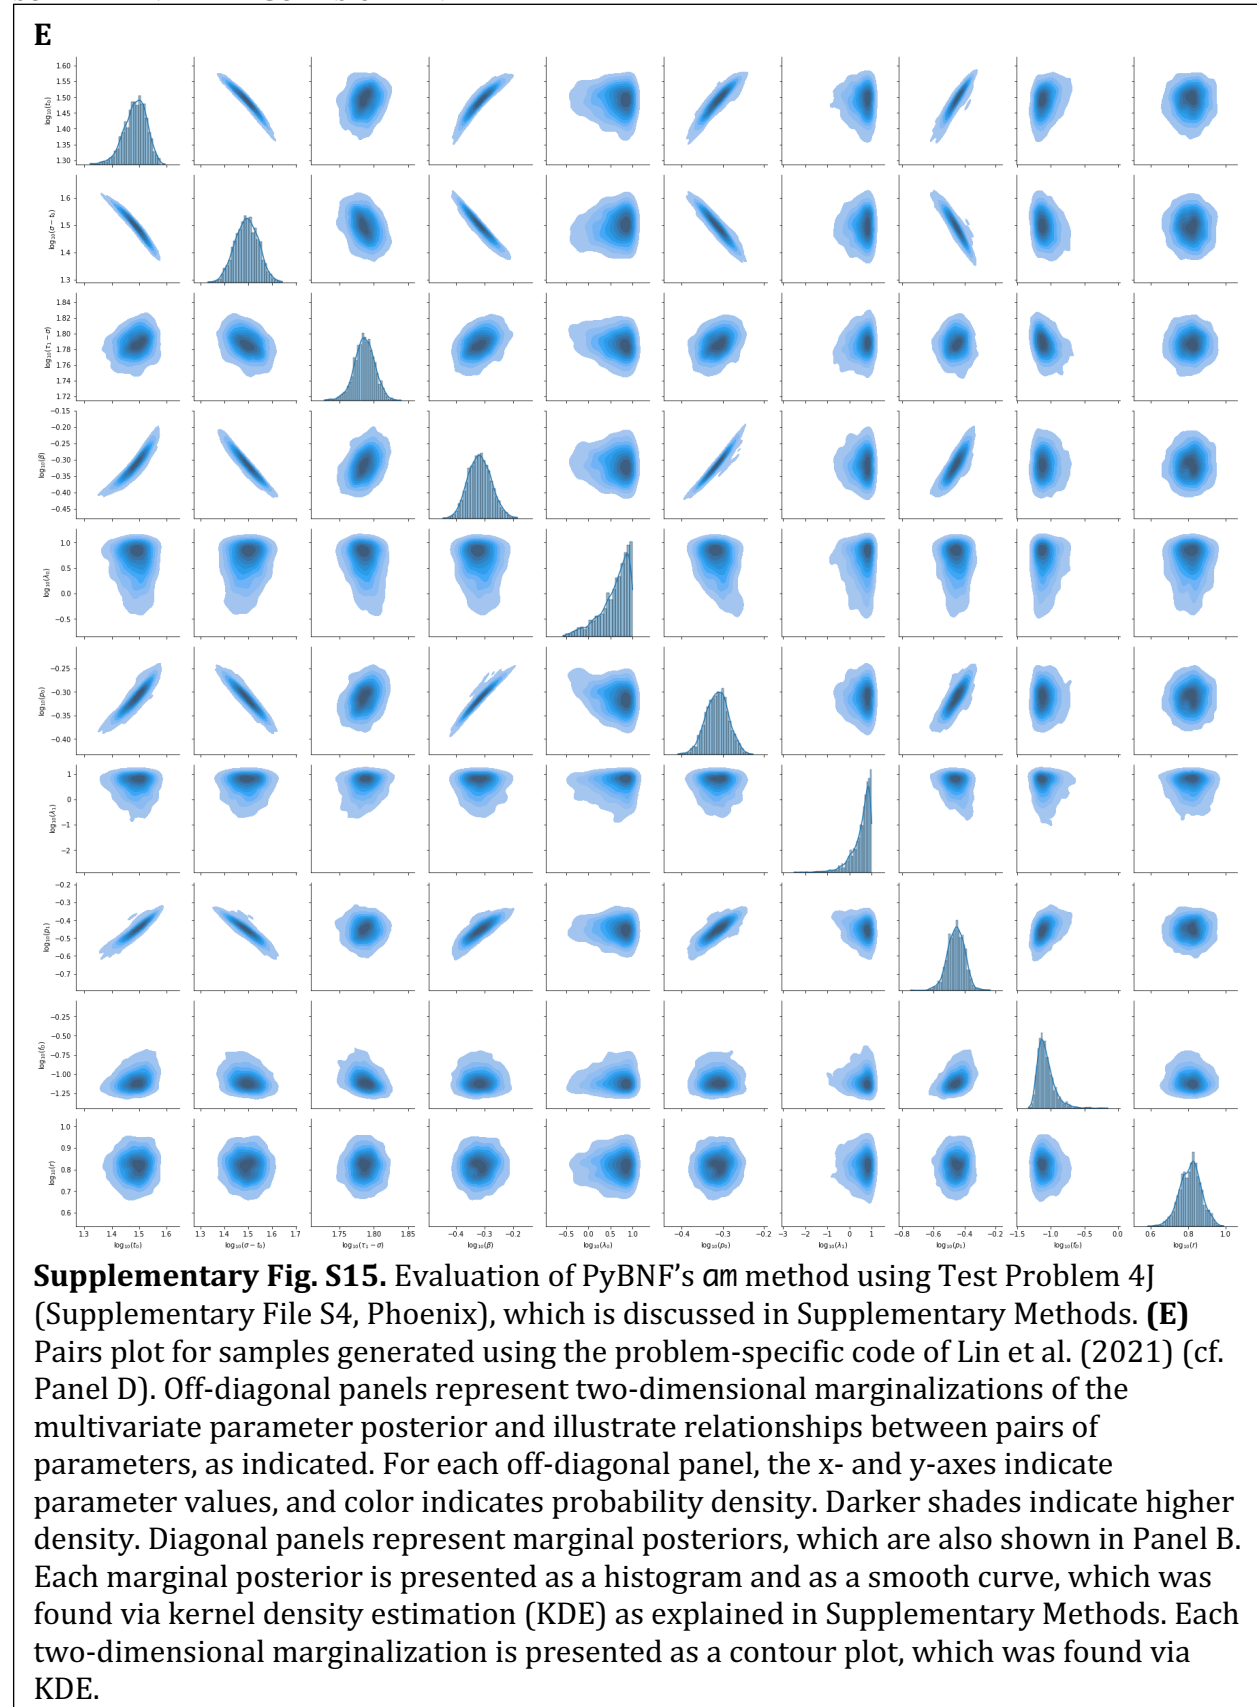

## SUPPLEMENTARY FIGURE S16 – PANEL A

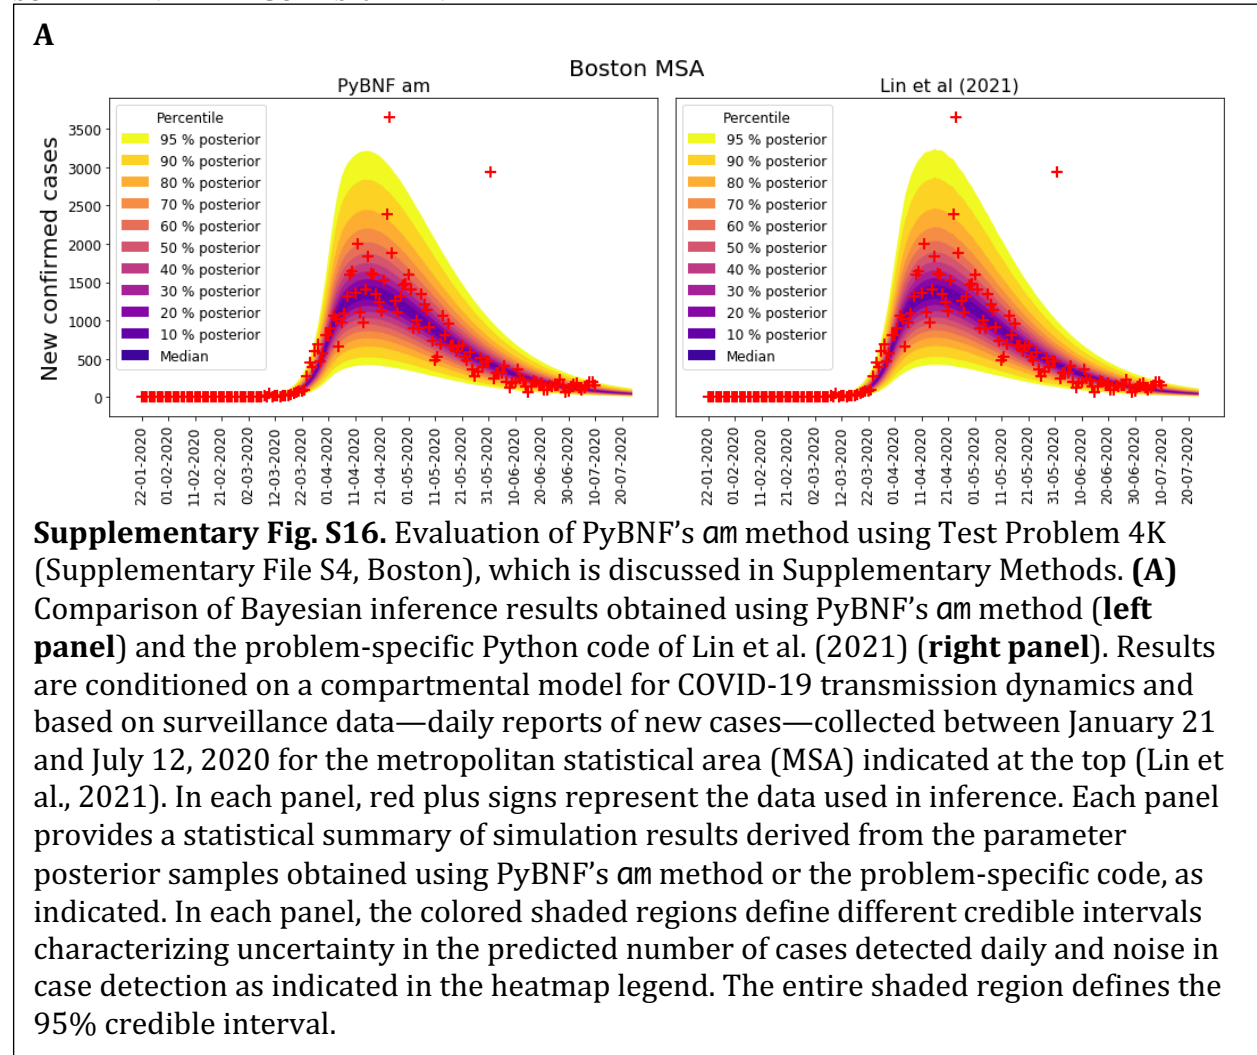



## SUPPLEMENTARY FIGURE S16 – PANEL B

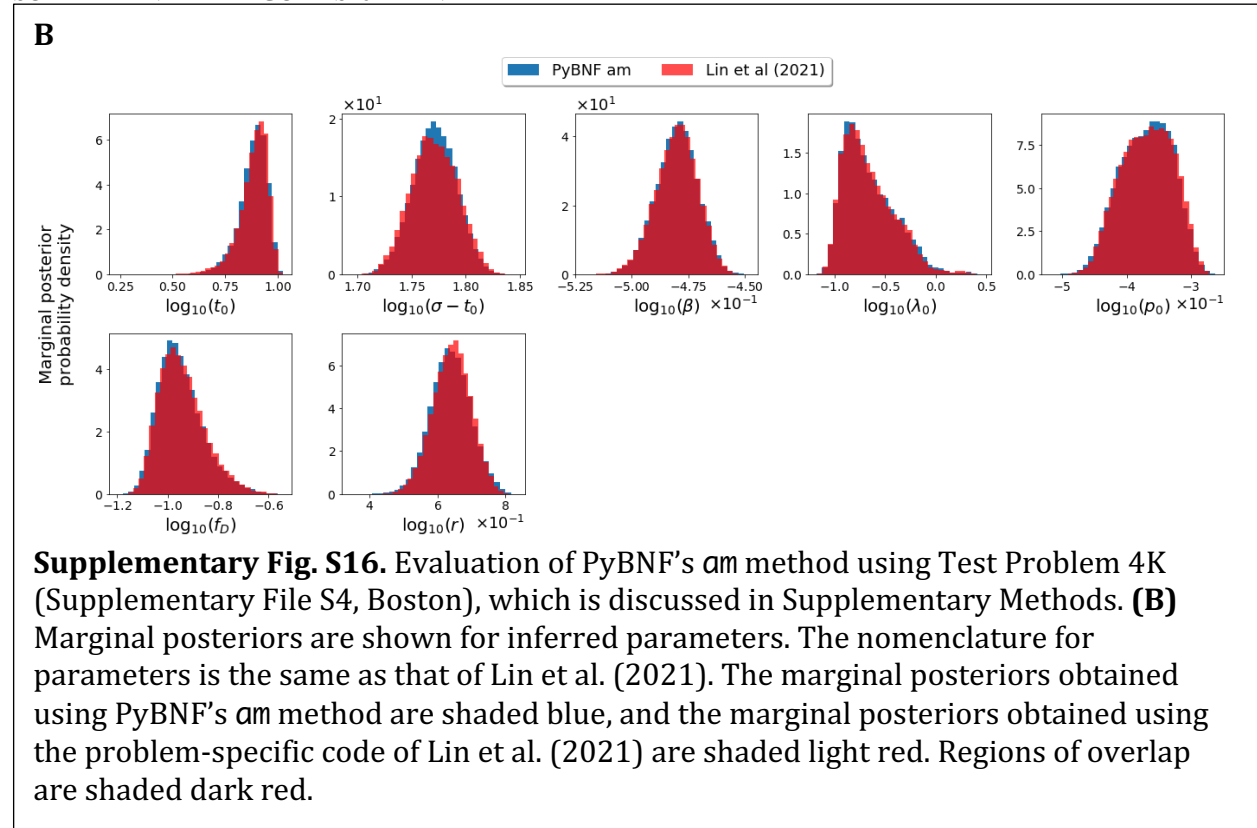

## SUPPLEMENTARY FIGURE S16 – PANEL C

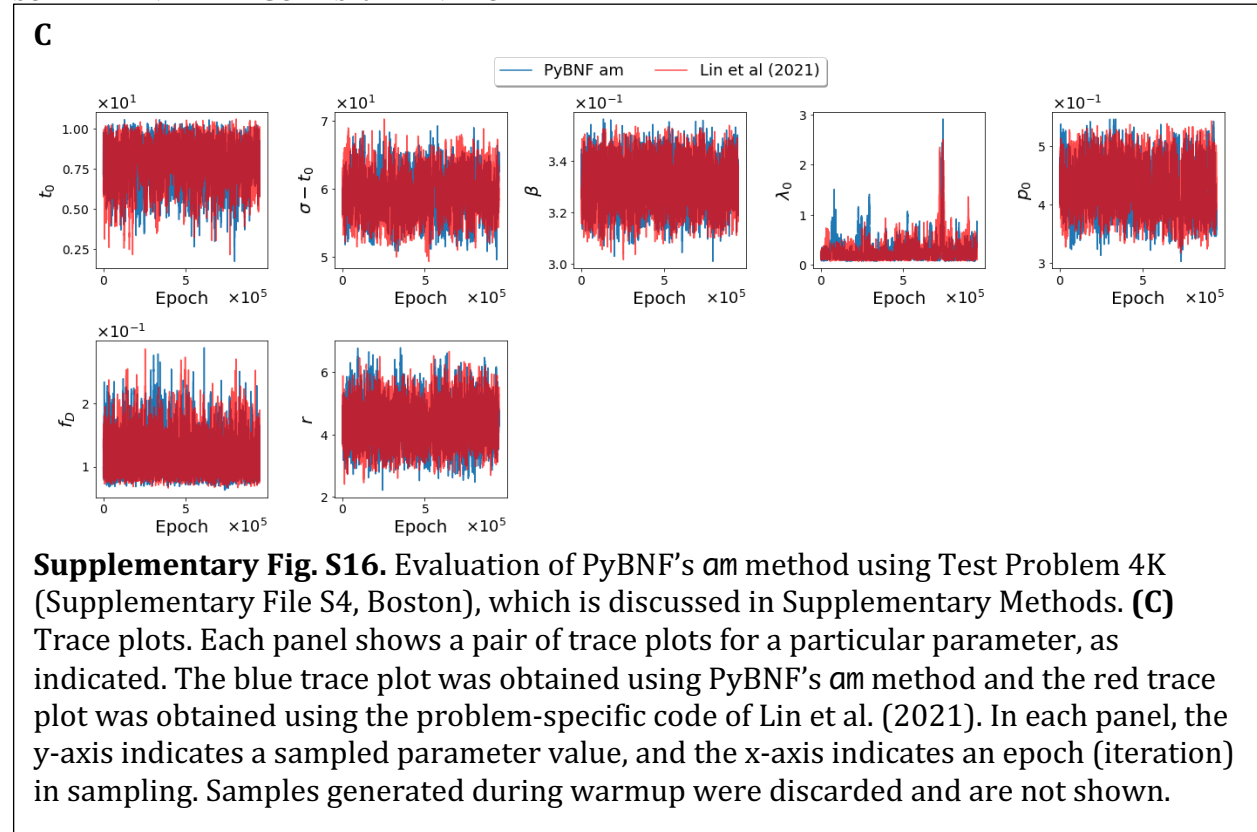

## SUPPLEMENTARY FIGURE S16 – PANEL D

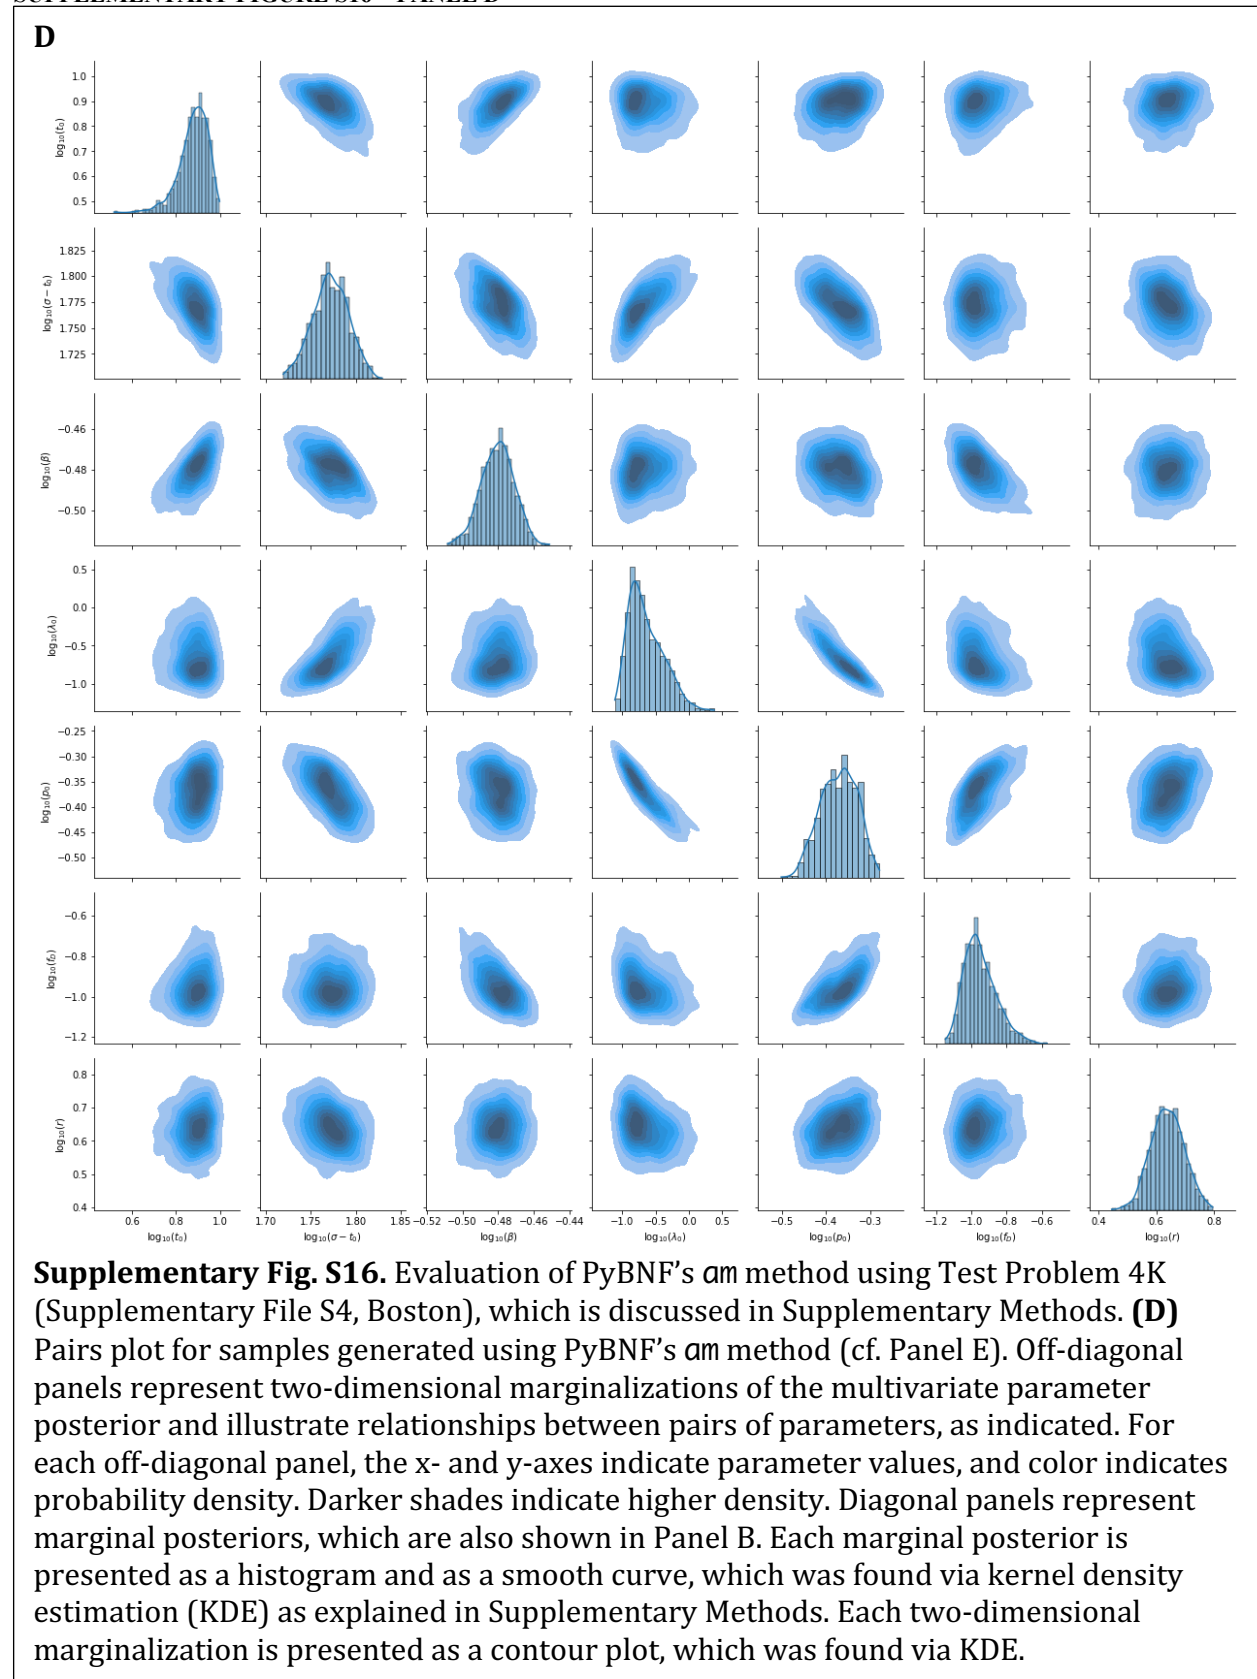

## SUPPLEMENTARY FIGURE S16 – PANEL E

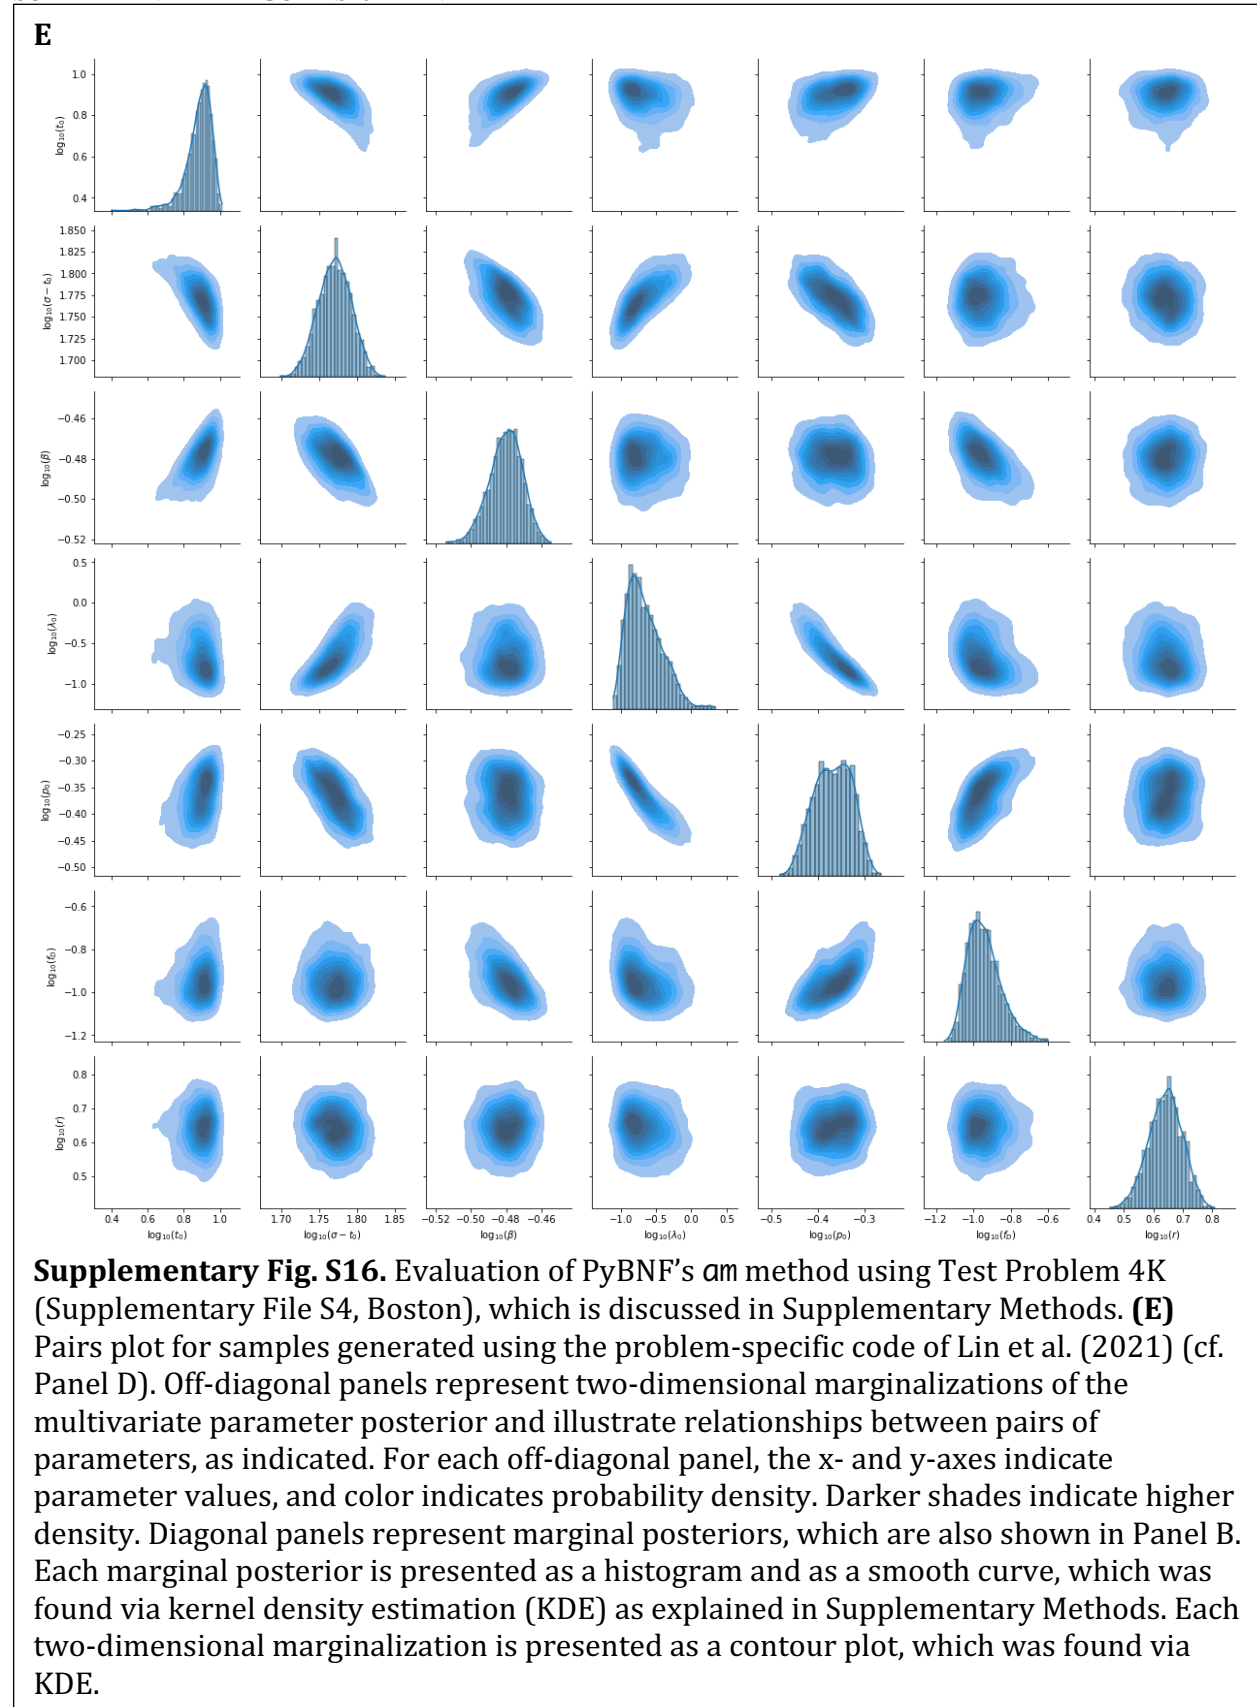

## SUPPLEMENTARY FIGURE S17 – PANEL A

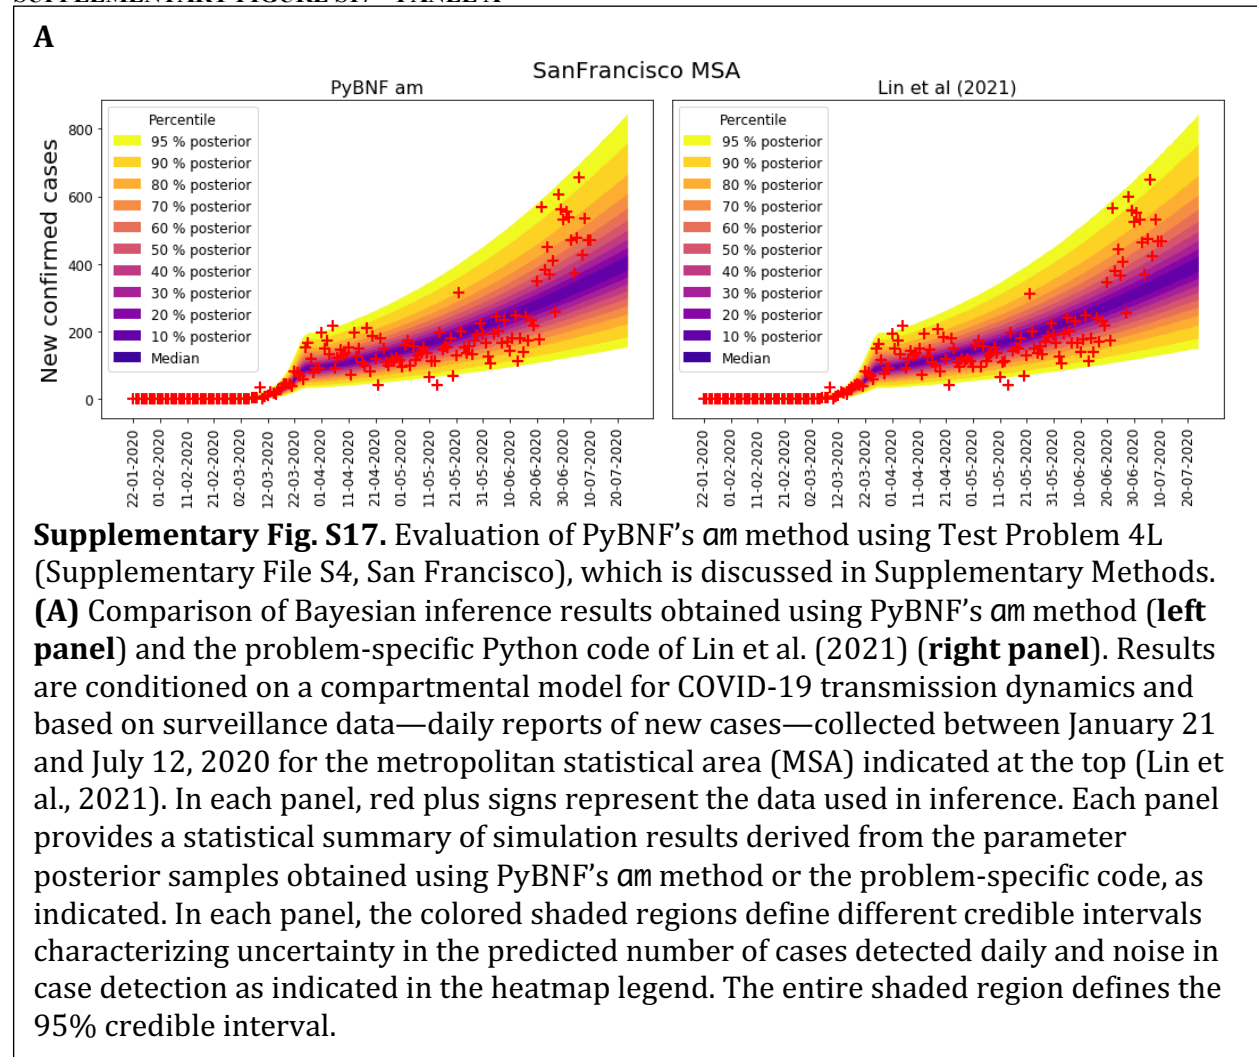

## SUPPLEMENTARY FIGURE S17 – PANEL B

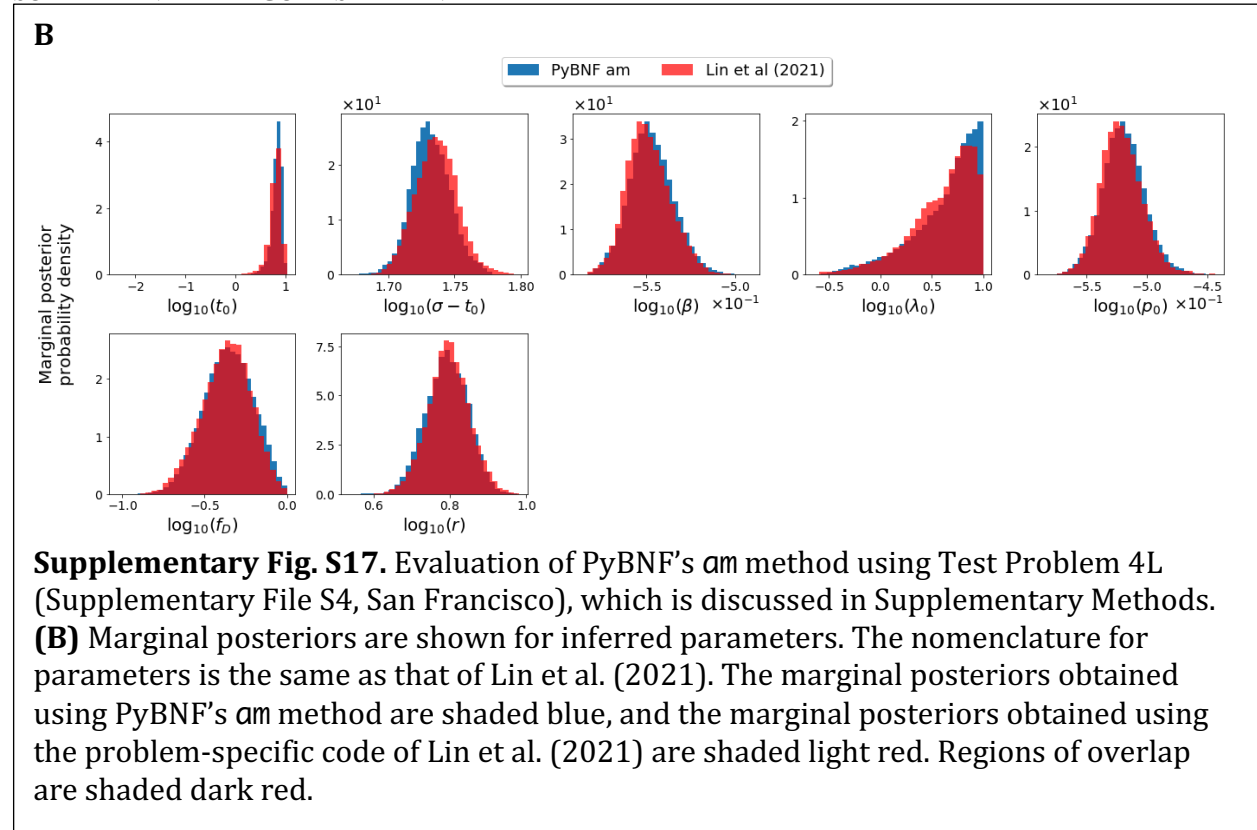

## SUPPLEMENTARY FIGURE S17 – PANEL C

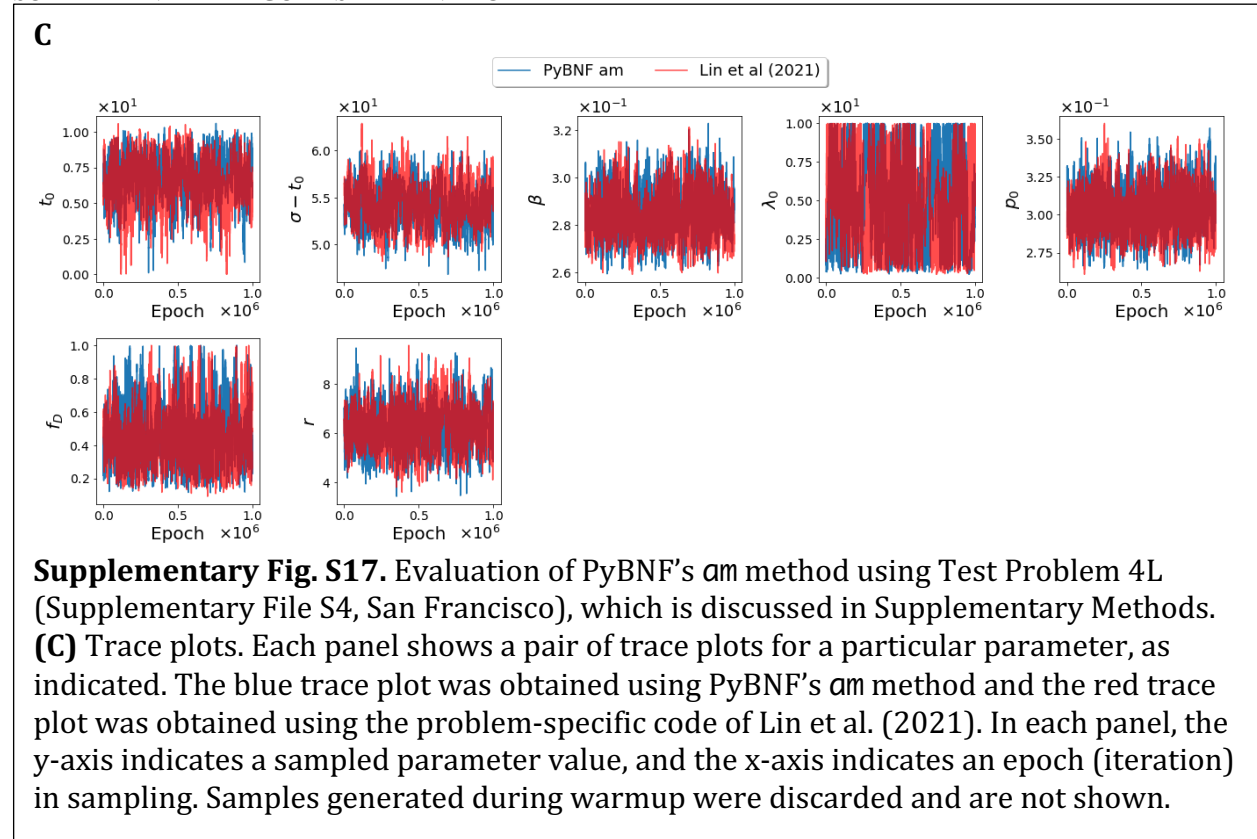

## SUPPLEMENTARY FIGURE S17 – PANEL D

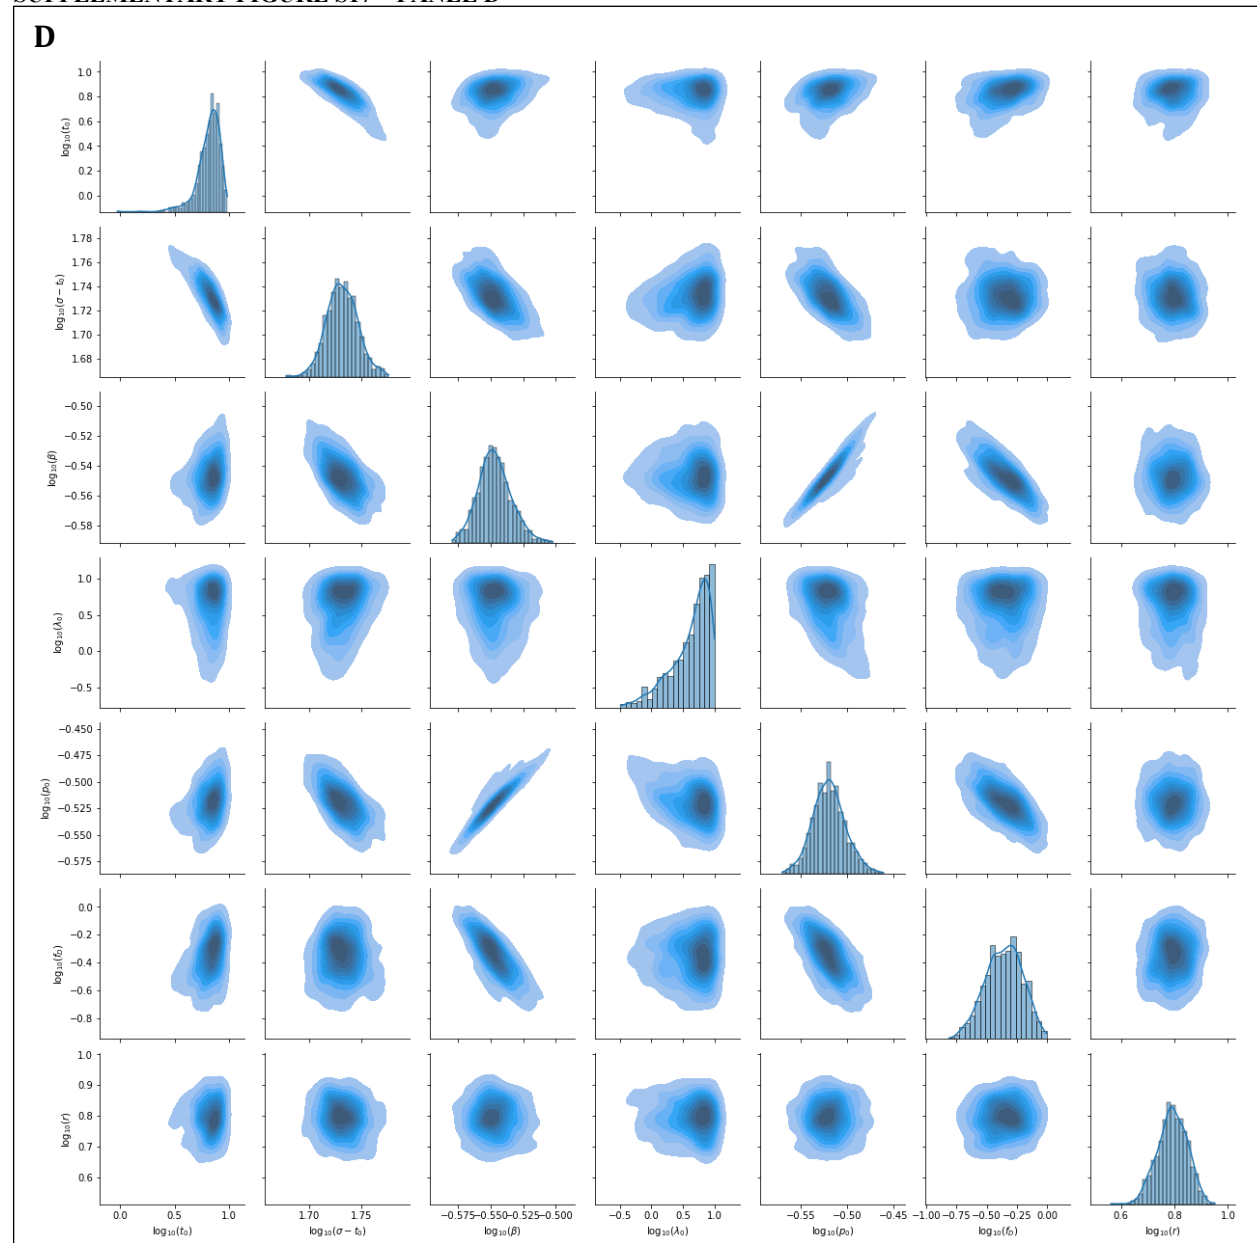

**Supplementary Fig. S17.** Evaluation of PyBNF's *am* method using Test Problem 4L (Supplementary File S4, San Francisco), which is discussed in Supplementary Methods. **(D)** Pairs plot for samples generated using PyBNF's *am* method (cf. Panel E). Off-diagonal panels represent two-dimensional marginalizations of the multivariate parameter posterior and illustrate relationships between pairs of parameters, as indicated. For each off-diagonal panel, the x- and y-axes indicate parameter values, and color indicates probability density. Darker shades indicate higher density. Diagonal panels represent marginal posteriors, which are also shown in Panel B. Each marginal posterior is presented as a histogram and as a smooth curve, which was found via kernel density estimation (KDE) as explained in Supplementary Methods. Each two-dimensional marginalization is presented as a contour plot, which was found via KDE.



## SUPPLEMENTARY FIGURE S17 – PANEL E

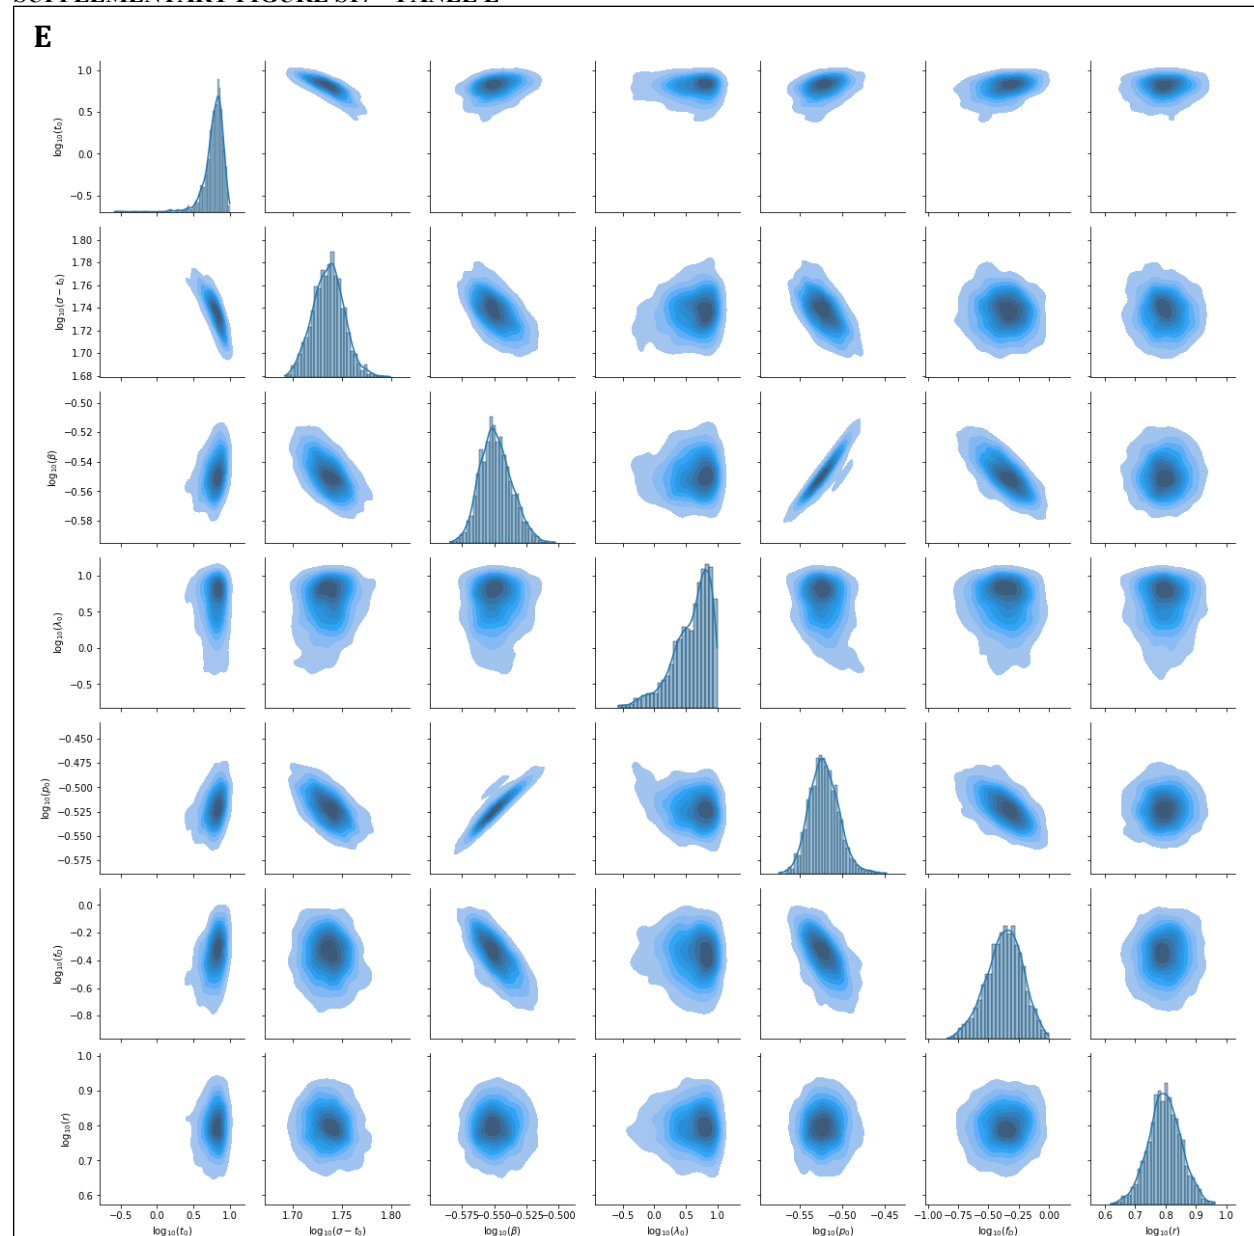

**Supplementary Fig. S17.** Evaluation of PyBNF's *am* method using Test Problem 4L (Supplementary File S4, San Francisco), which is discussed in Supplementary Methods. **(E)** Pairs plot for samples generated using the problem-specific code of Lin et al. (2021) (cf. Panel D). Off-diagonal panels represent two-dimensional marginalizations of the multivariate parameter posterior and illustrate relationships between pairs of parameters, as indicated. For each off-diagonal panel, the x- and y-axes indicate parameter values, and color indicates probability density. Darker shades indicate higher density. Diagonal panels represent marginal posteriors, which are also shown in Panel B. Each marginal posterior is presented as a histogram and as a smooth curve, which was found via kernel density estimation (KDE) as explained in Supplementary Methods. Each two-dimensional marginalization is presented as a contour plot, which was found via KDE.

## SUPPLEMENTARY FIGURE S18 – PANEL A

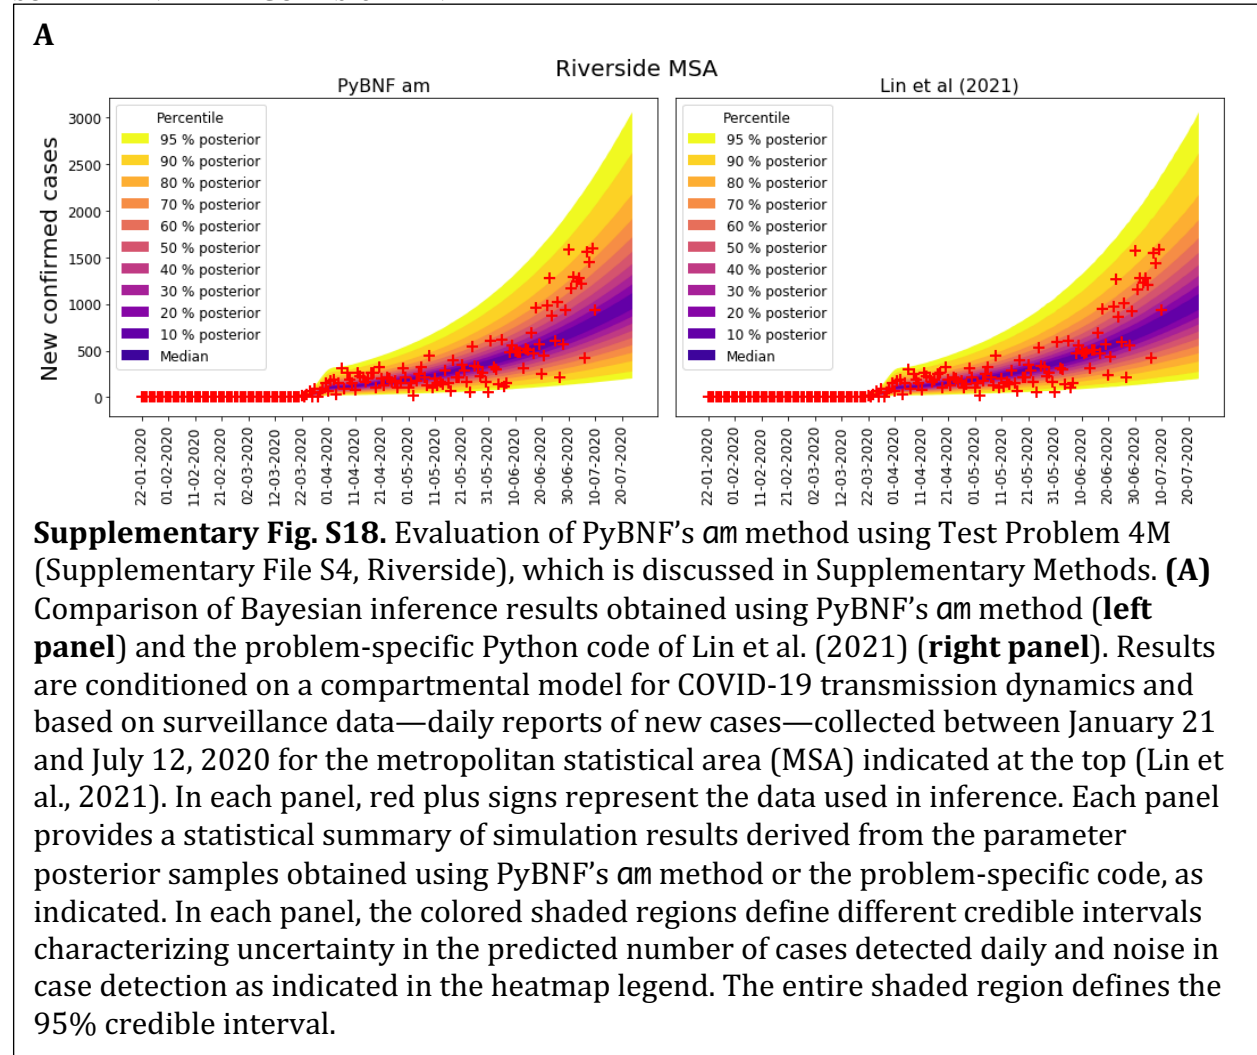

## SUPPLEMENTARY FIGURE S18 – PANEL B

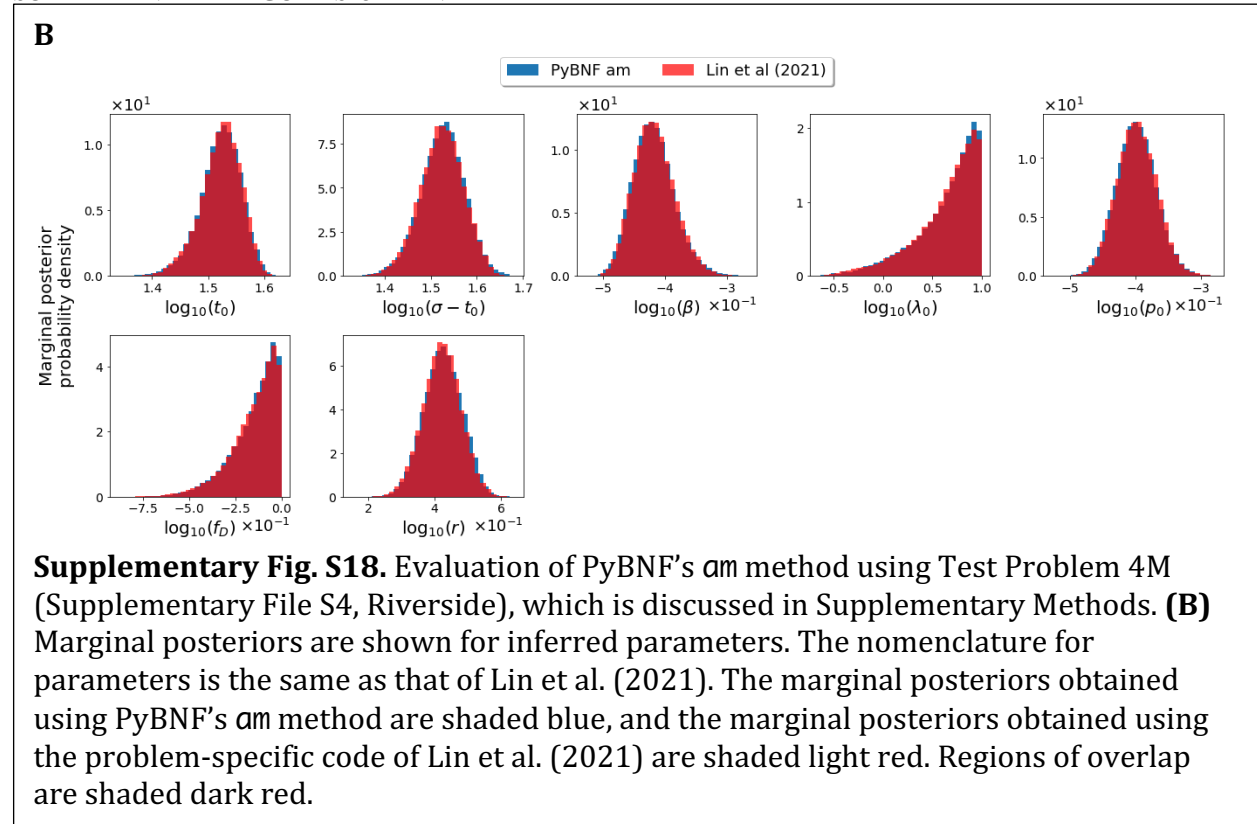

## SUPPLEMENTARY FIGURE S18 – PANEL C

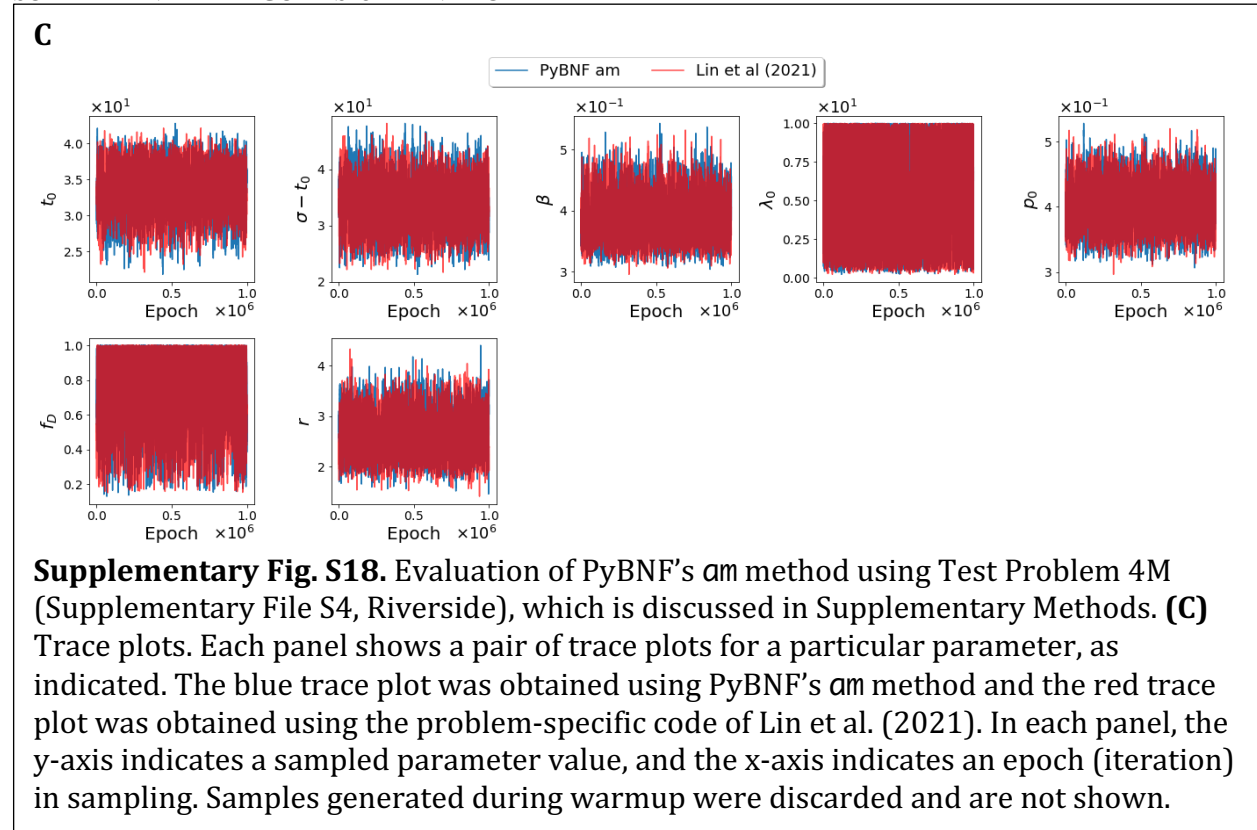

## SUPPLEMENTARY FIGURE S18 – PANEL D

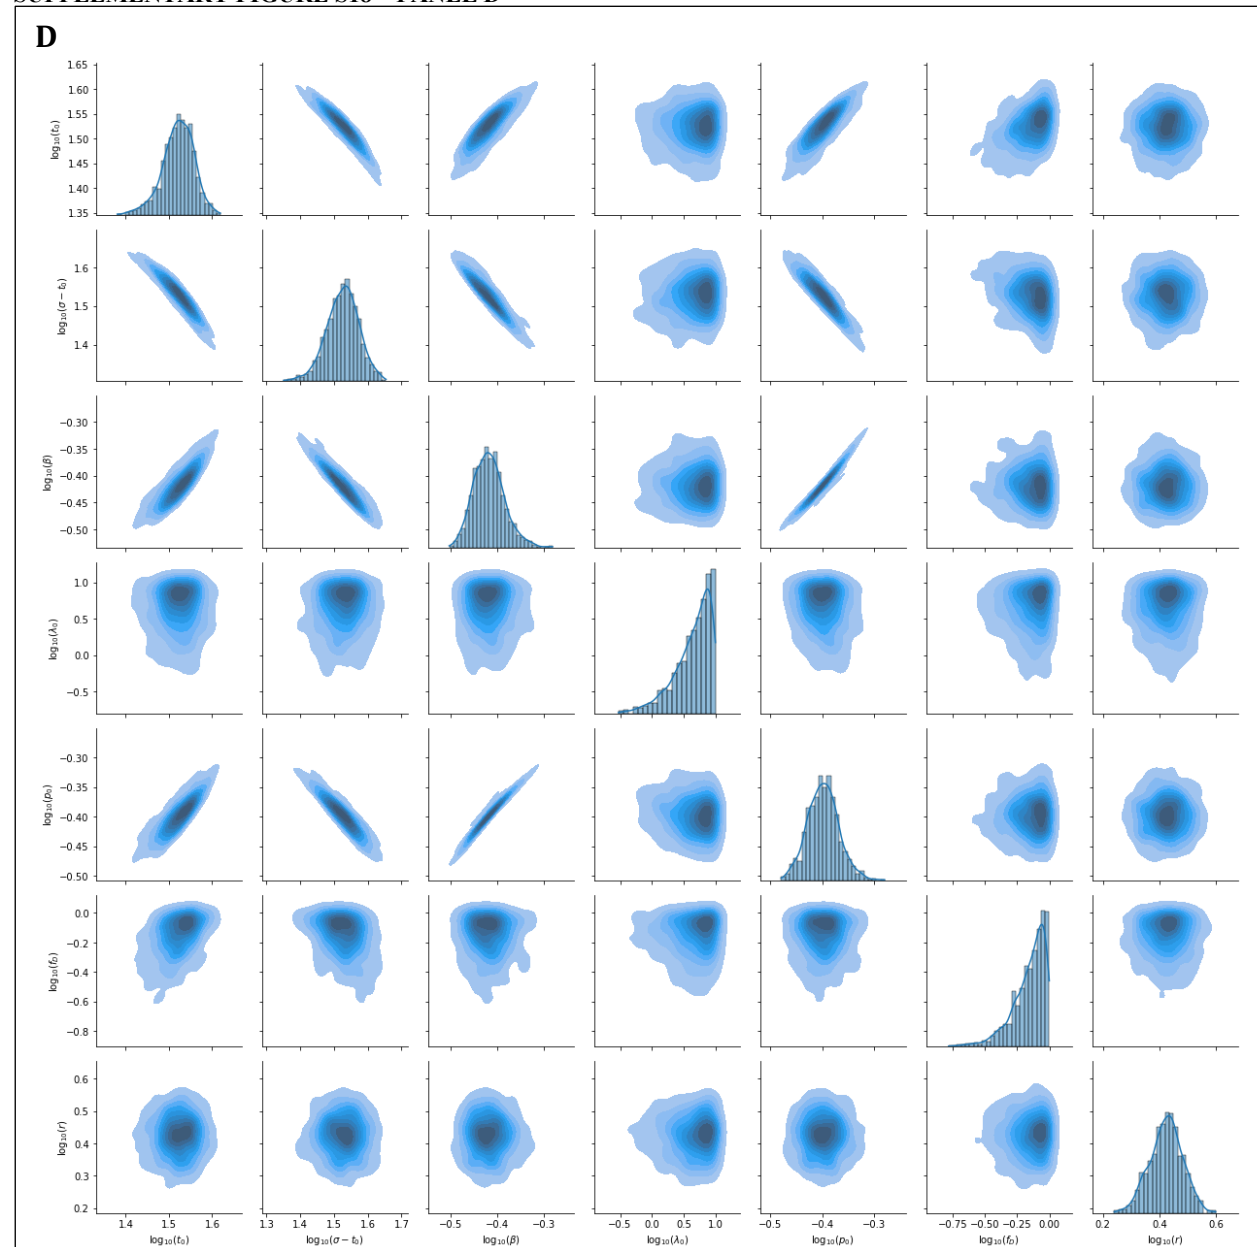

**Supplementary Fig. S18.** Evaluation of PyBNF's *am* method using Test Problem 4M (Supplementary File S4, Riverside), which is discussed in Supplementary Methods. **(D)** Pairs plot for samples generated using PyBNF's *am* method (cf. Panel E). Off-diagonal panels represent two-dimensional marginalizations of the multivariate parameter posterior and illustrate relationships between pairs of parameters, as indicated. For each off-diagonal panel, the x- and y-axes indicate parameter values, and color indicates probability density. Darker shades indicate higher density. Diagonal panels represent marginal posteriors, which are also shown in Panel B. Each marginal posterior is presented as a histogram and as a smooth curve, which was found via kernel density estimation (KDE) as explained in Supplementary Methods. Each two-dimensional marginalization is presented as a contour plot, which was found via KDE.

## SUPPLEMENTARY FIGURE S18 – PANEL E

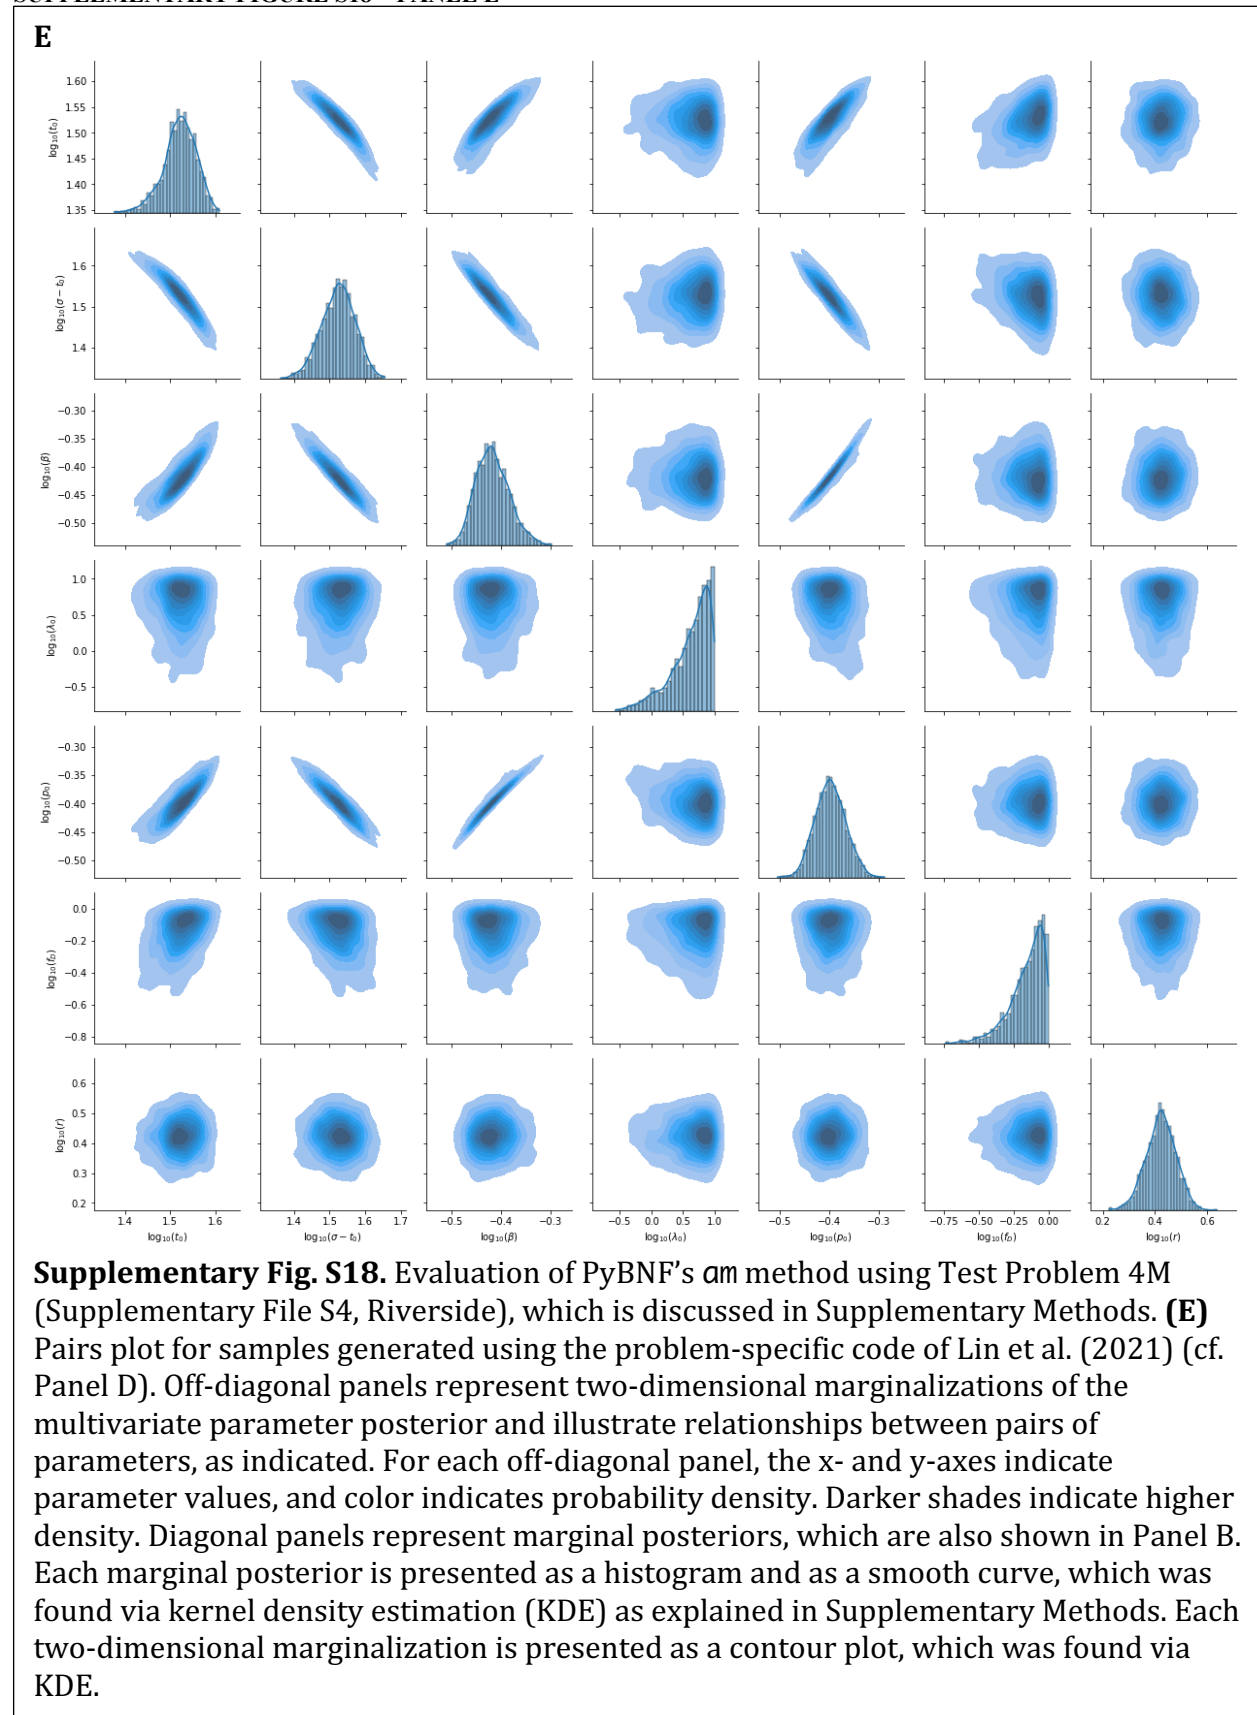

## SUPPLEMENTARY FIGURE S19 – PANEL A

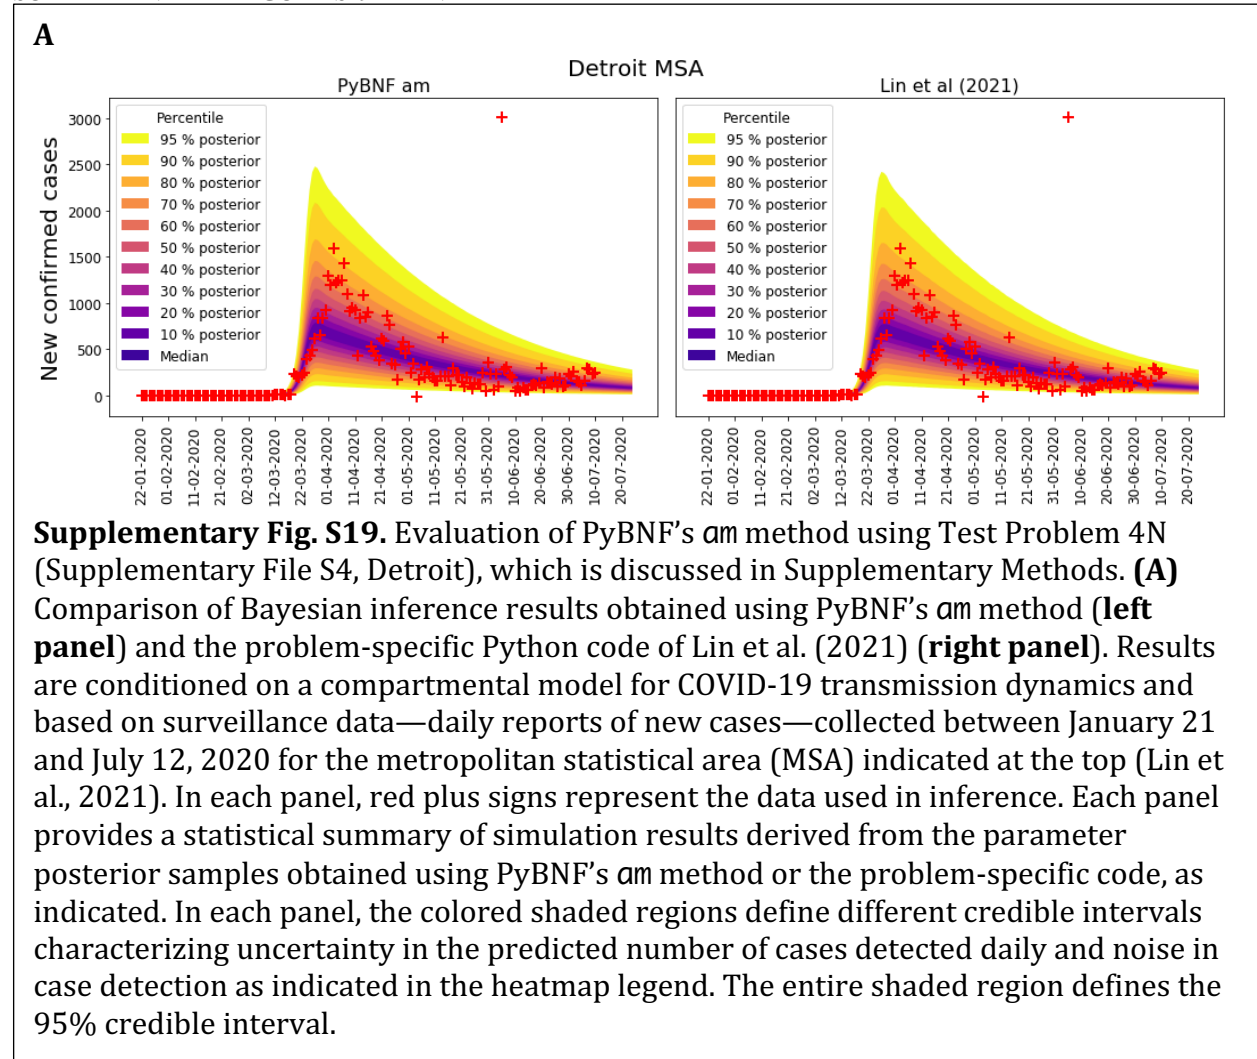

## SUPPLEMENTARY FIGURE S19 – PANEL B

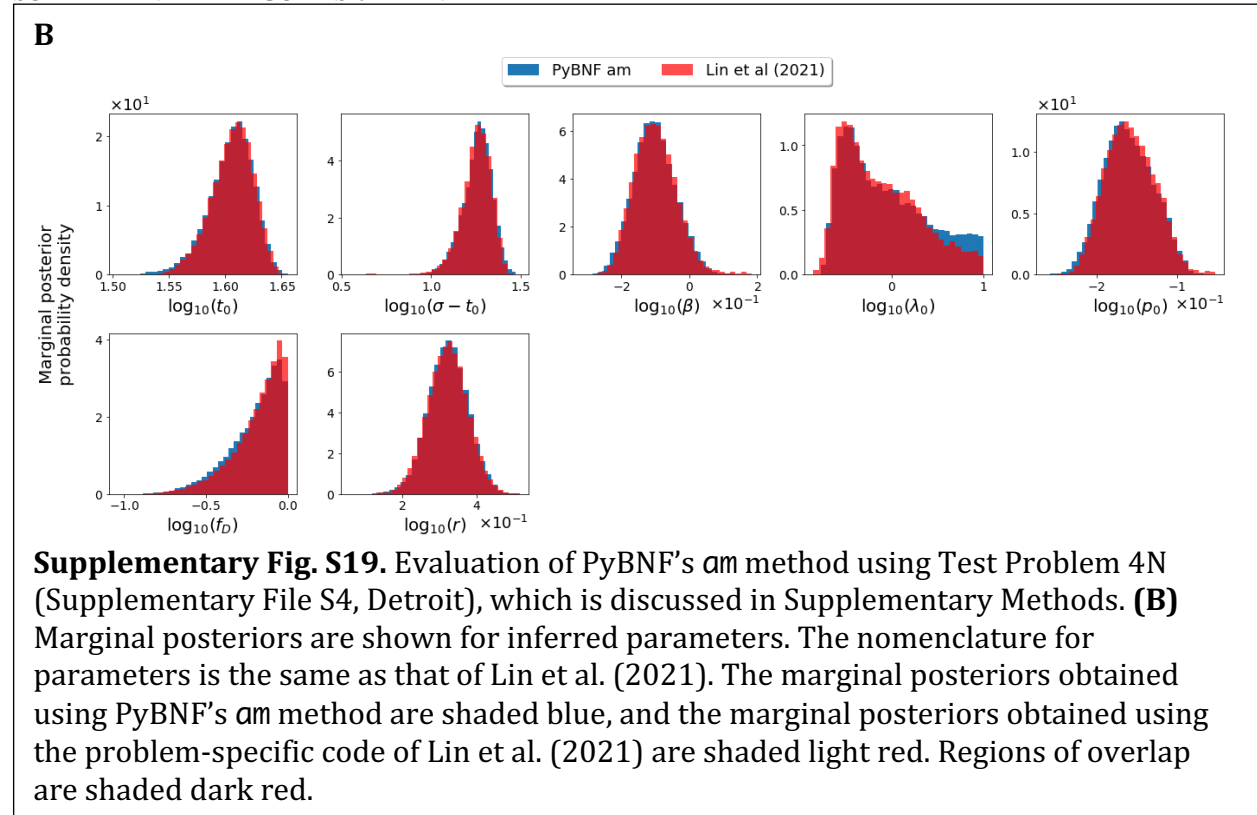



## SUPPLEMENTARY FIGURE S19 – PANEL C

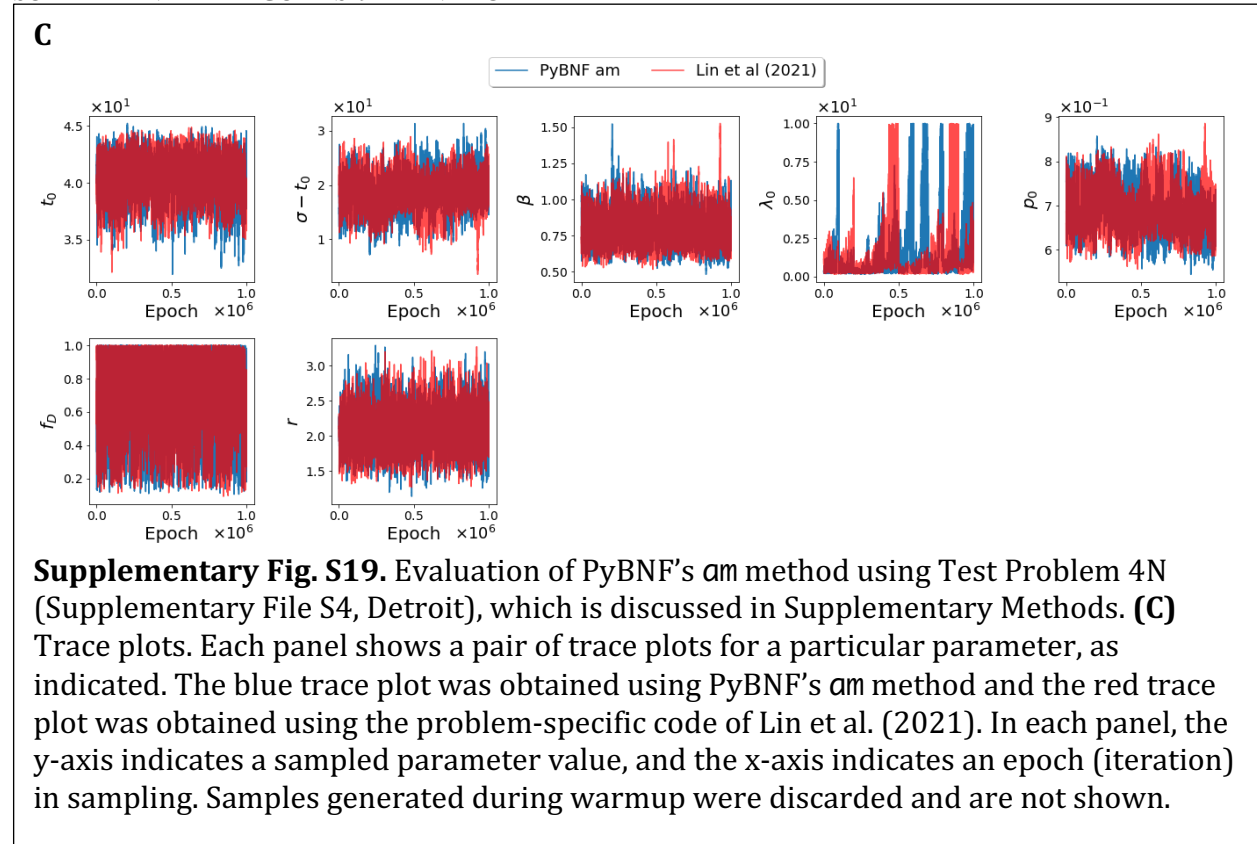

## SUPPLEMENTARY FIGURE S19 – PANEL D

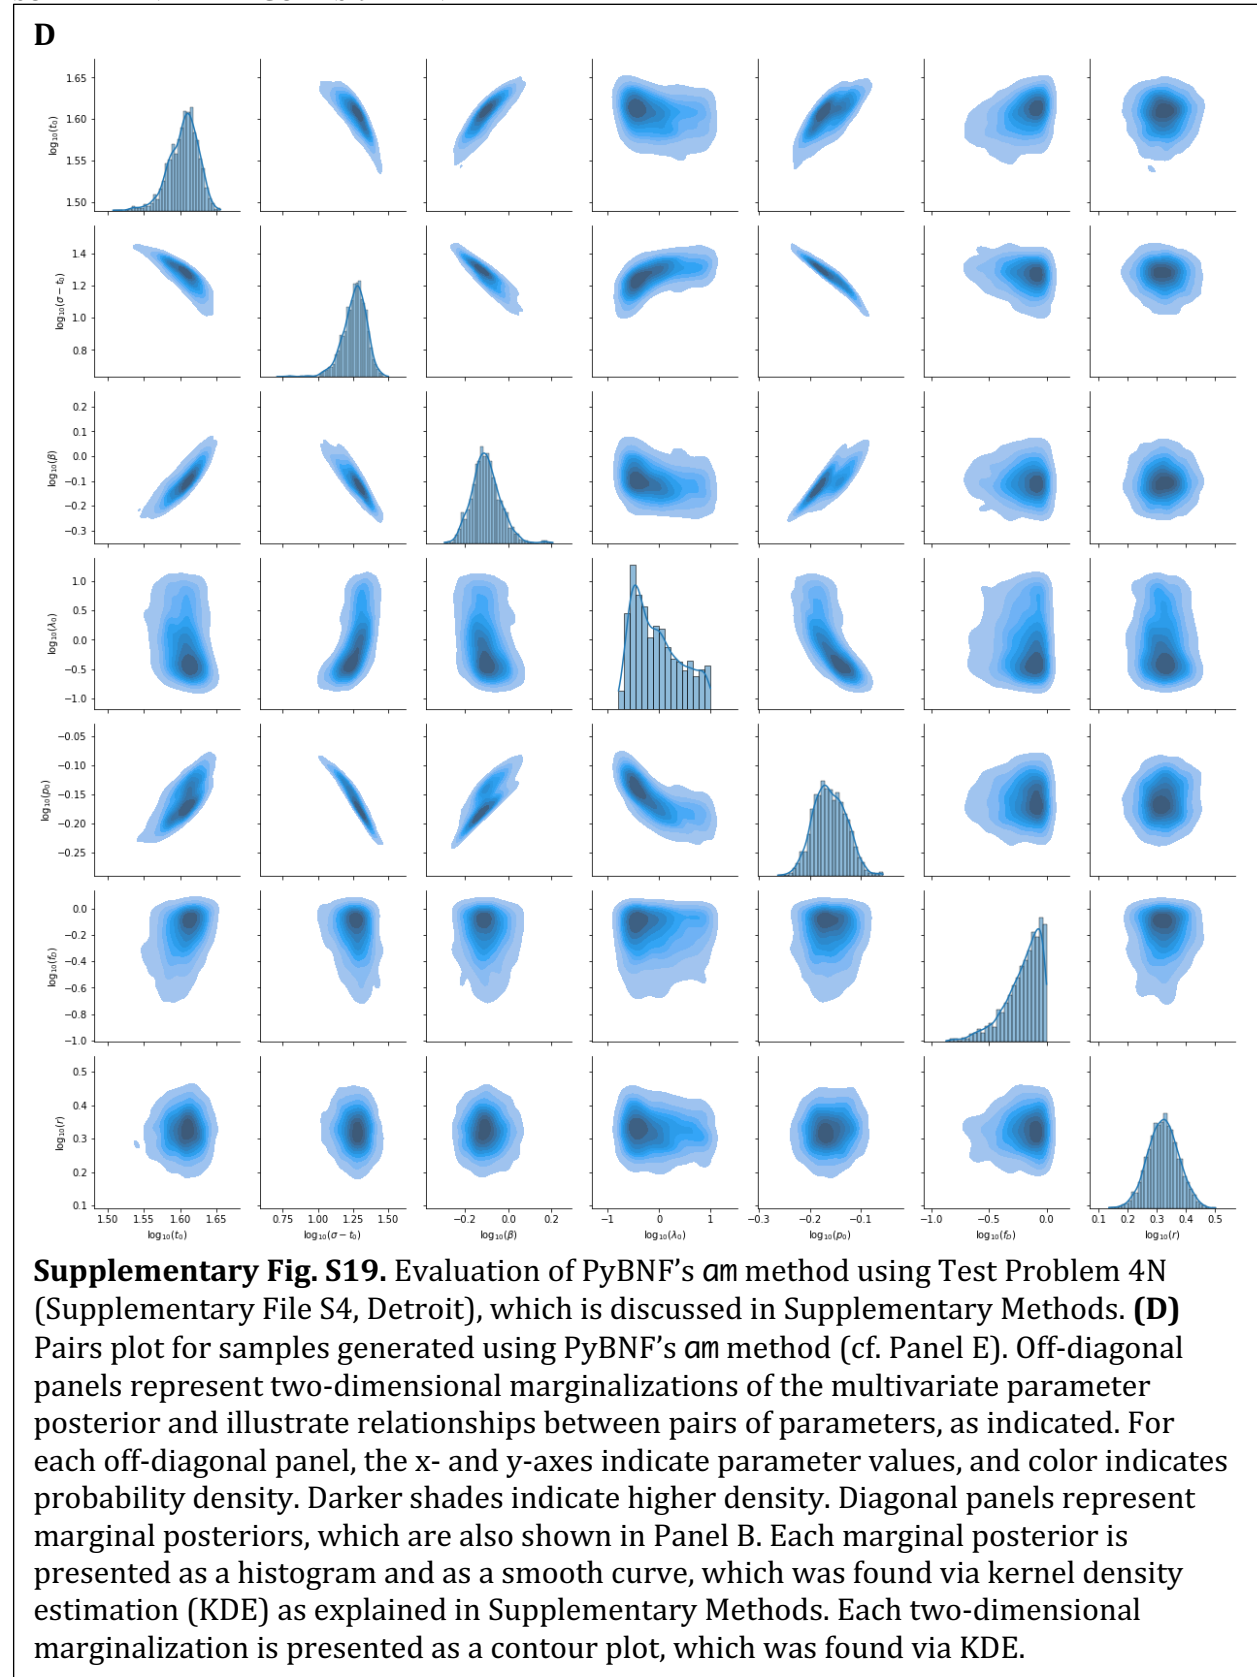

## SUPPLEMENTARY FIGURE S19 – PANEL E

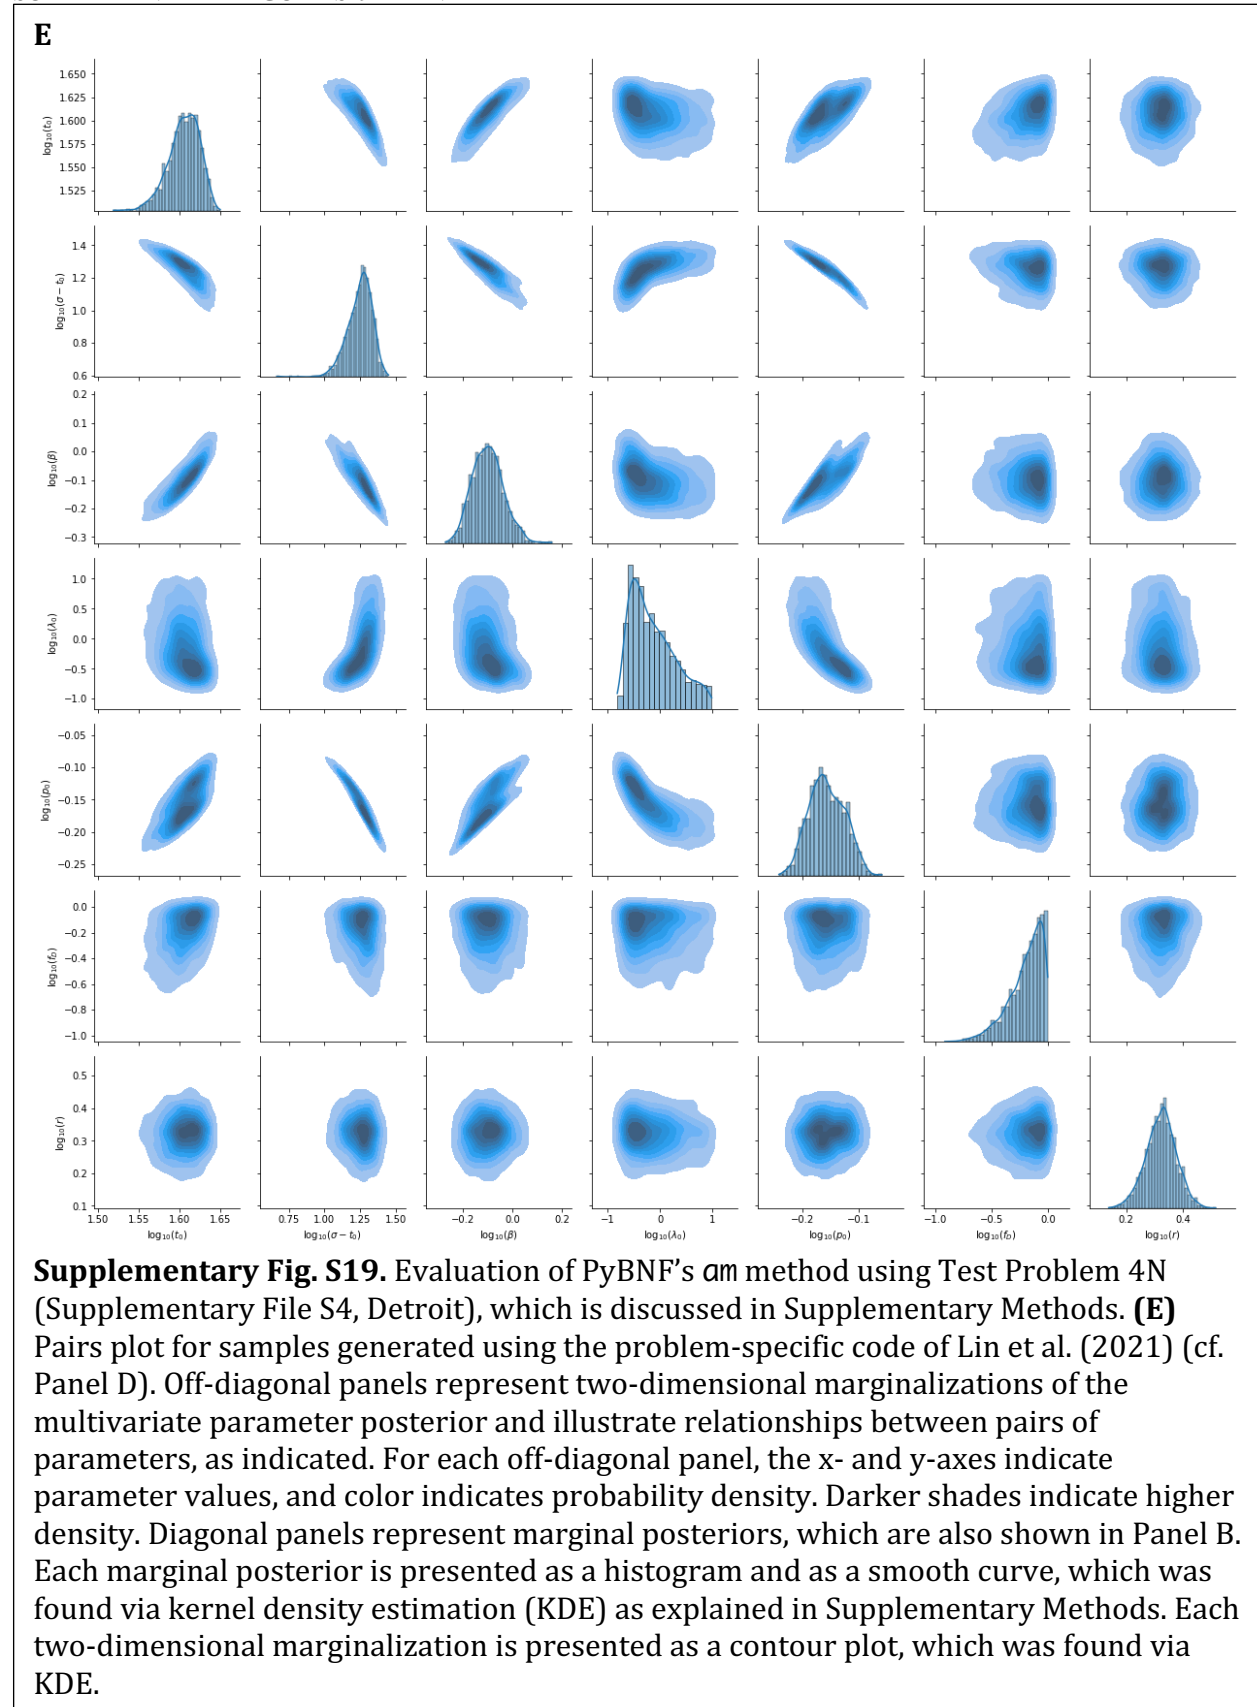

## SUPPLEMENTARY FIGURE S20 – PANEL A

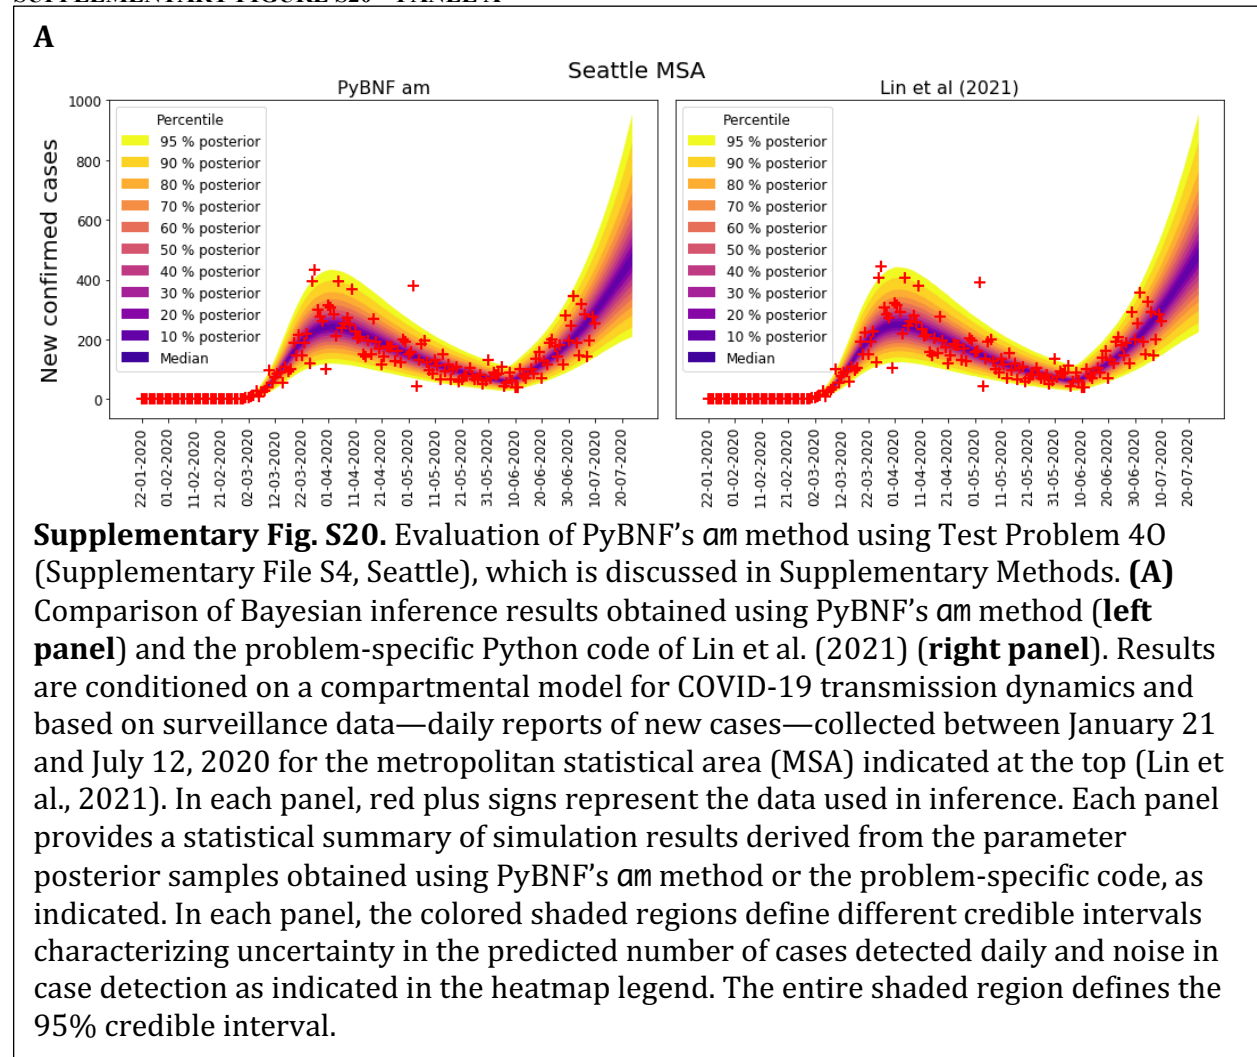

## SUPPLEMENTARY FIGURE S20 – PANEL B

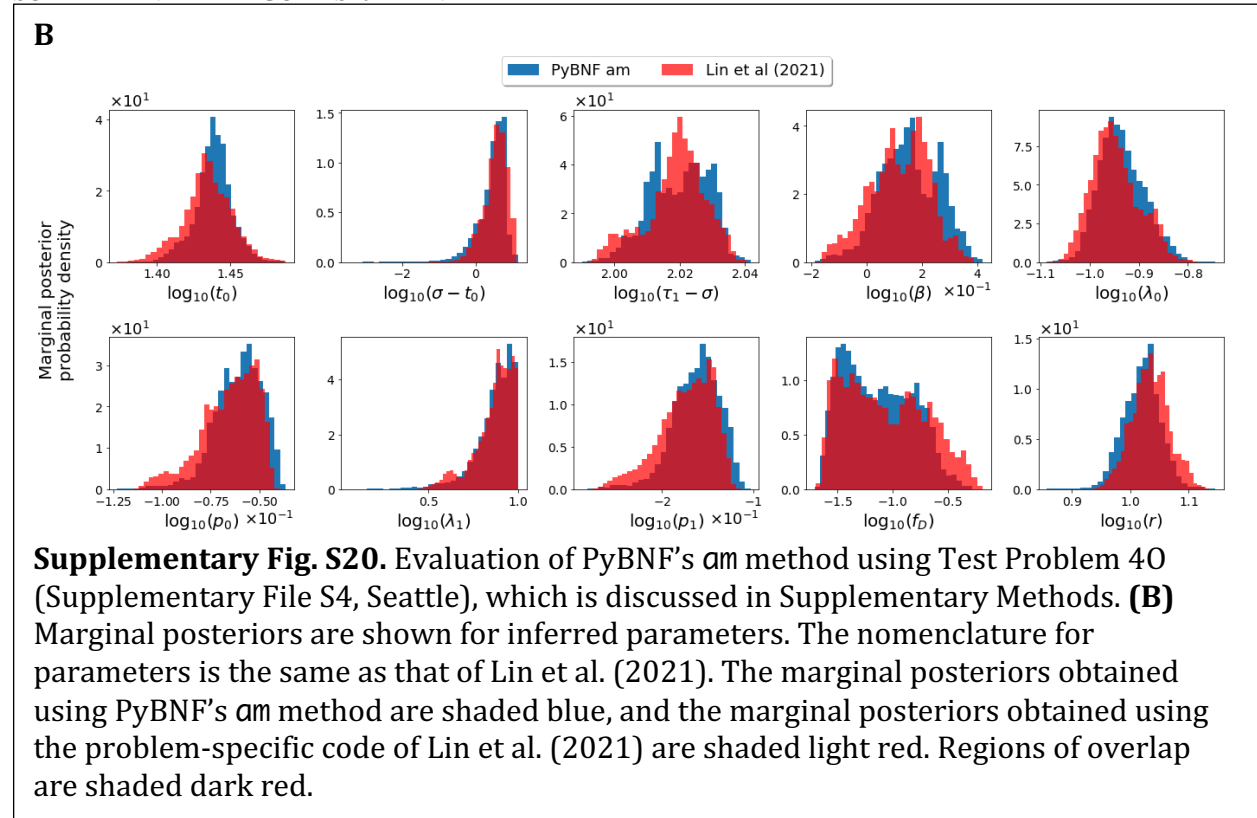

## SUPPLEMENTARY FIGURE S20 – PANEL C

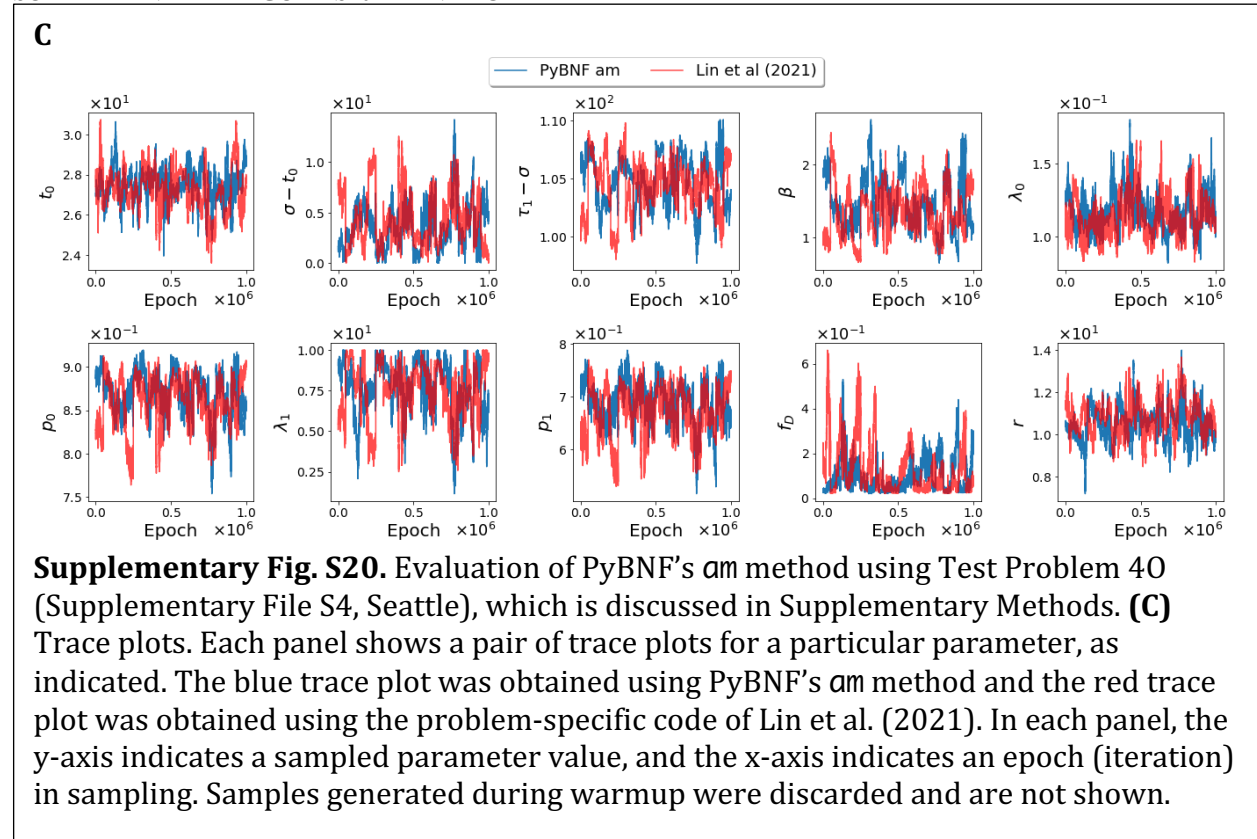

## SUPPLEMENTARY FIGURE S20 – PANEL D

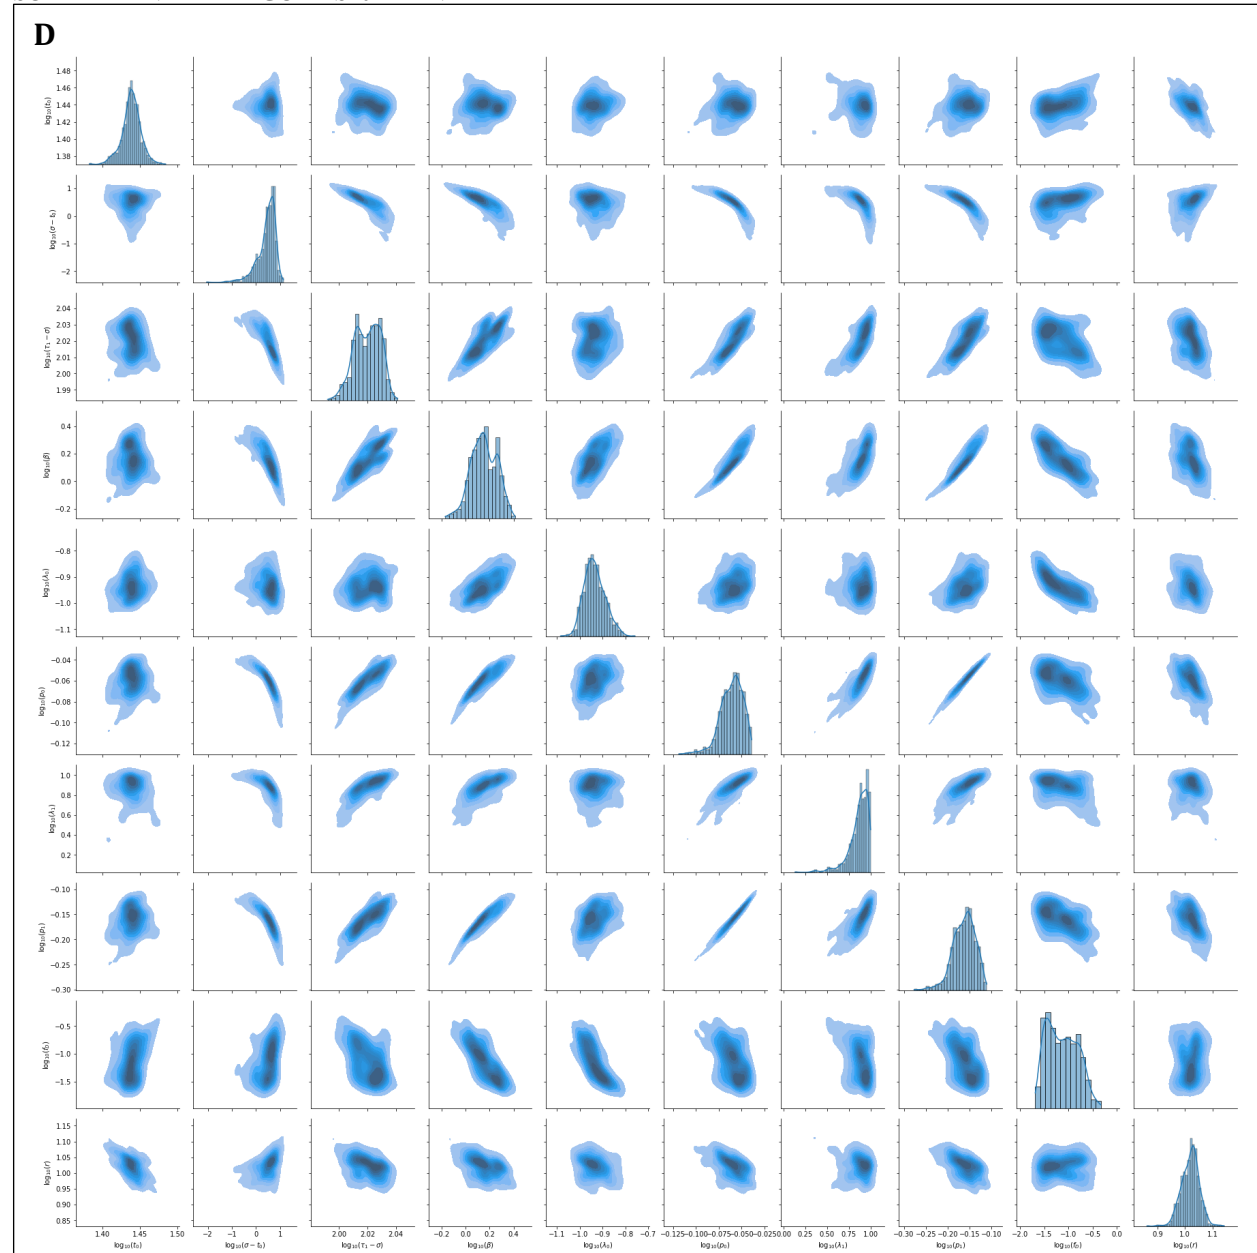

**Supplementary Fig. S20.** Evaluation of PyBNF’s *am* method using Test Problem 40 (Supplementary File S4, Seattle), which is discussed in Supplementary Methods. **(D)** Pairs plot for samples generated using PyBNF’s *am* method (cf. Panel E). Off-diagonal panels represent two-dimensional marginalizations of the multivariate parameter posterior and illustrate relationships between pairs of parameters, as indicated. For each off-diagonal panel, the x- and y-axes indicate parameter values, and color indicates probability density. Darker shades indicate higher density. Diagonal panels represent marginal posteriors, which are also shown in Panel B. Each marginal posterior is presented as a histogram and as a smooth curve, which was found via kernel density estimation (KDE) as explained in Supplementary Methods. Each two-dimensional marginalization is presented as a contour plot, which was found via KDE.

## SUPPLEMENTARY FIGURE S20 – PANEL E

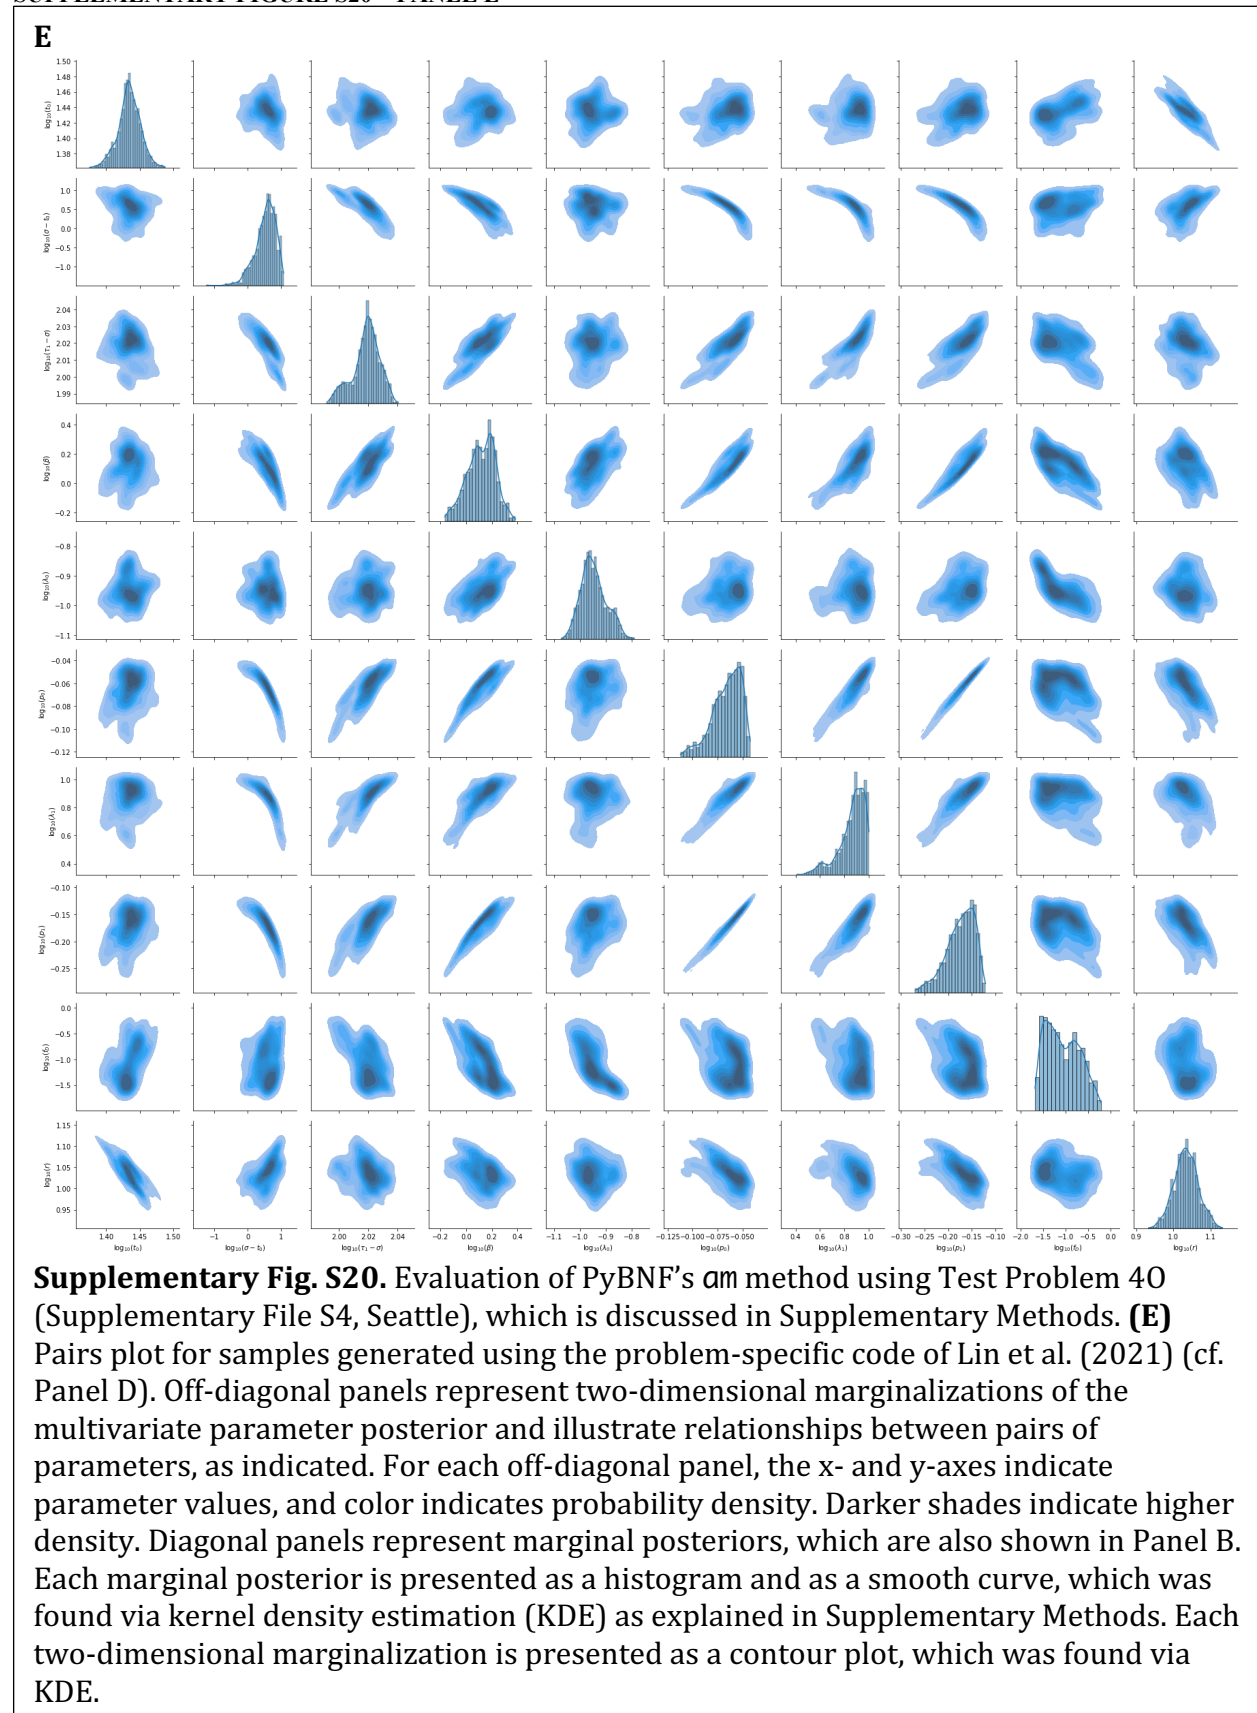

Supplement: btac004_supplementary_data.pdf [file btac004_supplementary_data.pdf]
